# Supplementary material for: A mass-weighted atmospheric isentropic coordinate for mapping chemical tracers and computing inventories
Source: Copernicus journal article supplement (doi:10.5194/acp-2020-841), 2020-08-19
Supplement: Supplementary file [file acp-2020-841-AC1-supplement.pdf]

## Response to Reviewers ACP-2020-841

We thank anonymous reviewers 1 and 2 for their valuable comments and efforts. We provide an updated manuscript, including updated figures, that incorporates the suggested changes and address specific comments below. In the following, the comments of the reviewer are presented in blue. Our responses are in black. Changes in the text are in red.

### Comments from Reviewer 1

(1) I think the introduction could provide a bit more information on the benefit of using coordinates based rather on physical than on geographical means, slightly following what is mentioned in the paragraph above.

We thank the reviewer for insightful suggestion and we agree that more information on the benefit together with the current application of isentropic coordinate would be helpful. We added the following sentences in the introduction:

**L30 – L42:** “A common approach to correct synoptic distortion is to use transformed coordinates rather than geographic coordinates (i.e., pressure-latitude), to take into account atmospheric dynamics and transport barriers. Such coordinate transformation has been used, for example, to reduce dynamically induced variability in the stratosphere using equivalent latitude rather than latitude as horizontal coordinate (Butchart and Remsberg, 1986), to diagnose tropopause profile using tropopause-based rather than surface-based vertical coordinate (Birner et al., 2002), to study transport regime in the Arctic using a horizontal coordinate based on Polar Dome (Bozem et al., 2019), and to study UTLS (Upper Troposphere Lower Stratosphere) tracer data by using tropopause-based, jet-based, and equivalent latitude coordinates (Irina et al., 2019). In the troposphere, a transformed coordinate, isentropic coordinate ( $\theta$ ) has been widely applied to evaluate the distribution of tracer data (Miyazaki et al., 2008; Parazoo et al., 2011, 2012). As air parcels move with synoptic disturbances,  $\theta$  and the tracer tend to be similarly displaced so that the  $\theta$ -tracer relationship is relatively conserved (Keppel-Aleks et al., 2011). Furthermore, vertical mixing tends to be rapid on  $\theta$  surfaces, so  $\theta$  and tracer contours are often nearly parallel (Barnes et al., 2016). However,  $\theta$  varies greatly with latitude and altitude over seasons due to changes in heating and cooling with solar insolation, which complicates the interpretation of  $\theta$ -tracer relationships on seasonal time scales.”

(2) One question which came to my mind is about the time scales for which this coordinate may be applicable. It is stated that  $M_{\theta_e}$  follows the synoptic distortions but is almost constant with respect to the seasonal cycle. So, would you then conclude that it is not applicable on the synoptic time scale? Or asked differently, is there a sort of a lower time scale limit?

$M_{\theta_e}$  moves in parallel with the corresponding  $\theta_e$  surface on the synoptic time scale, which is useful in correcting this dynamic-induced disturbances. When applied to sparse airborne observations,  $M_{\theta_e}$  is similar to  $\theta_e$  in correcting these disturbances on the short time scale. However,  $\theta_e$  surfaces move meridionally with season, which is not suitable to study the seasonal cycle, since a given  $\theta_e$  surface represents different part of the atmosphere in different seasons. Under this circumstance,  $M_{\theta_e}$ , which has less seasonality, is useful to map a tracer. The advantage of  $M_{\theta_e}$  is that, on the synoptic time scale, it corrects the synoptic disturbances, like  $\theta_e$ , to compute a mean tracer concentration with high accuracy, and on the seasonal scale, represents a similar part of the atmosphere, to be useful in mapping the seasonal cycle of a tracer. Besides, on the synoptic time scales,  $M_{\theta_e}$  may have an advantage over  $\theta_e$  in making it easier to compute atmospheric inventories.

(3) L74-77: From my point of view the mass integration which is currently in the supplement could be part of the main manuscript, since it is the central aspect of the first part of the manuscript. And about the mass integration, the upper boundary has only been introduced because you wanted to study the seasonal cycle of the tropospheric  $\text{CO}_2$ , right? So, let's say, if I want to study a distribution of species in the upper troposphere and lower stratosphere, the upper boundary would not be needed anymore (also surfaces of  $\theta_e$  become "flat" at a certain altitude and as such are an upper boundary).

We moved Supplementary S1 (i.e., method of mass integration) into Section 2.2 (**L81 – L94**). We have upper boundary at tropopause because we are only interested in  $\text{CO}_2$  distribution in the troposphere for our application. For other applications, for example, tracer distribution in the upper troposphere and lower stratosphere, the upper boundary is not necessary or should be set at the top of the stratosphere. We concluded in our discussion (**L425**) that the set of boundary conditions should be based on target of interest.

(4) Sec 4.1: Just out of curiosity, but have you looked at  $\text{CO}_2$  in a  $\theta_e - M_{\theta_e}$  coordinate system to study the seasonal cycle? Just similar to tracer distributions in an equivalent latitude-potential temperature coordinate system.

We haven't looked at it, but this is a good suggestion for future analysis.

(5) L36ff: It is mentioned that  $M_{\theta}$  has been used for Atom and HIPPO data. Is there any reference available? Or has it only be used for internal analysis?

The idea of  $M_{\theta e}$  stems from analysis of ATom and HIPPO data so it has only been used for internal analysis.

(6) L41: A bit more details at this point between the Linz study and this study would be beneficial for the reader (since potentially, not everyone interested in this tropospheric study might be familiar with the Linz study).

We thank the reviewer for the valuable suggestion. We added the following sentence to better describe Linz study:

**L49 – L50:** “We note that a similar concept to  $M_{\theta e}$  has been introduced in the stratosphere by Linz et al. (2016), in which  $M(\theta)$  is defined as the mass above the  $\theta$  surface, to study the relationship between age of air and diabatic circulation of the stratosphere.”

(7) L42:  $M_{\theta e}$  is mentioned here for the first time without being introduced before. This is only the case in the next paragraph.

The first time we mention  $M_{\theta e}$  is in the sentence “we have found it useful to transform potential temperature into a mass-based unit,  $M_{\theta}$ , which we define as the total mass of dry air under a given isentropic surface in the hemisphere.” This sentence occurs before line 42.

(8) Sec 2.1: For each reanalysis, the number of levels is given but no more information. Could you provide at least the altitude/pressure of the top level and potentially, the level list (how much levels are roughly in the troposphere)?

We thank the reviewer for the suggestion. We added the following sentences to describe the vertical levels of each reanalysis product in more detail.

**L69 – L74:** “All products have  $2.5^\circ$  horizontal resolution. NCEP2 has daily resolution and we average 6-hourly ERA-Interim fields and 3-hourly MERRA2 fields to yield daily fields. ERA-Interim has 32 vertical levels from 1000 mbar to 1 mbar, with approximately 20 to 27 levels in the troposphere. NCEP2 has 17 vertical levels from 1000 mbar to 10 mbar, with approximately 8 to 12 levels in the troposphere. MERRA2 has 42 vertical levels from 985 mbar to 0.01 mbar, with approximately 21 to 25 levels in the troposphere.”

(9) L72: It could also be mentioned here that the saturation mixing ratio of water vapor is a modified version of Wexler (1976).

Thanks for pointing it out. We now mention this in **L81:** “Following Bolton (1980), we compute water vapor mixing ratio ( $w$ ) from relative humidity (RH,  $\text{kg kg}^{-1}$ ) provided by the reanalysis products and the formula for saturation mixing ratio of water vapor ( $P_{s,v}$ , mbar) modified by Wexler (1976).”

(10) L79: Why did you not simply calculate the PV for NCEP2 data? I have no idea how well ERA- Interim and NCEP2 agree, but I wonder if it would not be better to calculate the PV for NCEP2 for consistency reasons.

NCEP2 potential vorticity is not directly available at pressure level, so we interpolated ERA-Interim PV to the NCEP2 fields. We have calculated PV for NCEP2 and applied the new upper boundary for NCEP2 mass integration.

(11) L81: Actually, what is meant with this? Do you refer to regions where pressure is not defined, such as the 850 hPa level over the Himalayan mountains?

Yes. We added the following sentence to make this description more clear.

L99-100: “ERA-Interim and NCEP2 include hypothetical levels below the true land/sea surface, for example, the 850 hPa level over the Himalayan, which we exclude in the calculation of  $M_{\theta_e}$ .”

(12) L90: Could you provide the range of  $\theta_e$  values for which  $M_{\theta_e}$  has been calculated?

The  $\theta_e$ - $M_{\theta_e}$  lookup table provided spans from the lowest to the highest  $\theta_e$  surface in the troposphere of each day. Therefore the range of  $\theta_e$  of  $M_{\theta_e}$  is different day by day but contains all value in the troposphere. We added the following sentence to better describe the  $\theta_e$  range.

**L108 – L110:** “We provide this look-up table for each hemisphere computed from ERA-Interim from 1980 to 2018 with daily resolution and from the lowest to the highest  $\theta_e$  surface in the troposphere with 1 K interval (see data availability).”

(13) L94: For Figure 2, it would potentially be good to add two more panels showing the same as Fig 2a,b but not for the zonal average but for an arbitrary longitude? This would potentially help in the discussion centered around the two branches of the Hadley Circulation (L102ff). I also wonder if a  $\theta_e$  vs  $M_{\theta_e}$  plot for one or more time steps might be beneficial for the reader to get a more comprehensive idea on the relation between the two quantities and the evolution of these quantities with time.

We thank the reviewer for the suggestion. We added another two panels in new Figure 3, showing Jan-2009 average and July-2009 average  $M_{\theta_e}$  cross sections at 180E and 100E. This figure also clearly shows the difference in summer to winter  $M_{\theta_e}$  displacements over the ocean and land. We find that adding more time steps, by adding more line types, only makes the figure too noisy to visualize. We think summer and winter  $M_{\theta_e}$  cross section alone could help to sharply focus on the seasonal variability of  $M_{\theta_e}$ , without being distracted with too many details. For the new panels, we added more description of  $M_{\theta_e}$  displacements as the zonal average and at these two meridians as following.

**L123 – L141:”**  $M_{\theta_e}$  surfaces at given meridians (Figure 3) in the Northern Hemisphere show clear zonal asymmetry, with larger and more complex displacements compared to the zonal averages, associated with differential heating by land and ocean, and orographic stationary Rossby waves (Hoskins and Karoly, 1981; Wills and Schneider, 2018). For example, over the Northern Hemisphere ocean at 180°E (Figure 3a) and from the summer to winter,  $M_{\theta_e}$  surfaces move poleward in the mid- to high latitude (e.g. poleward of 45°N), but move equatorward in the mid- to low latitude lower troposphere (e.g. equatorward of 45°N, 900 – 700 mbar), with the magnitude smaller than 10 degrees latitude in both. Whereas, over the Northern Hemisphere land at 100°E (Figure 3b) and from the summer to winter,  $M_{\theta_e}$  surfaces moves equatorward by up to 30 degrees latitude, except high latitude middle troposphere (e.g. poleward of 70°N, ~ 500 mbar), where the flat  $M_{\theta_e}$  surfaces lead to slightly poleward displacements. In the Southern Hemisphere, in contrast, the summer to winter displacements of the 180°E and 100°E sections are similar to the zonal average.

At lower latitudes, the zonal averages of  $M_{\theta_e}$  and  $\theta_e$  both exhibit strong secondary maxima near the surface associated with the Hadley circulation (Equatorward of 30° N/S) and in the summer, driven by high water vapor. From the contours in Figure 2, this surface branch of high  $M_{\theta_e}$  and  $\theta_e$  appears disconnected from the upper tropospheric branch. In fact, these two branches are connected through air columns undergoing deep convection, which are not resolved in the zonal means shown in Figure 2, but are resolved in some meridians (e.g. Figure 3a). We also note that, over the land at 100°E (Figure 3b), the two disconnected  $M_{\theta_e}$  and  $\theta_e$  branches in the Northern Hemisphere summer are displaced poleward compared to the zonal average, consistent with a northward shift of intertropical convergence zone (ITCZ) over southern Asia. The existence of these two branches may limit some applications of  $M_{\theta_e}$ , as discussed in Section 4.”

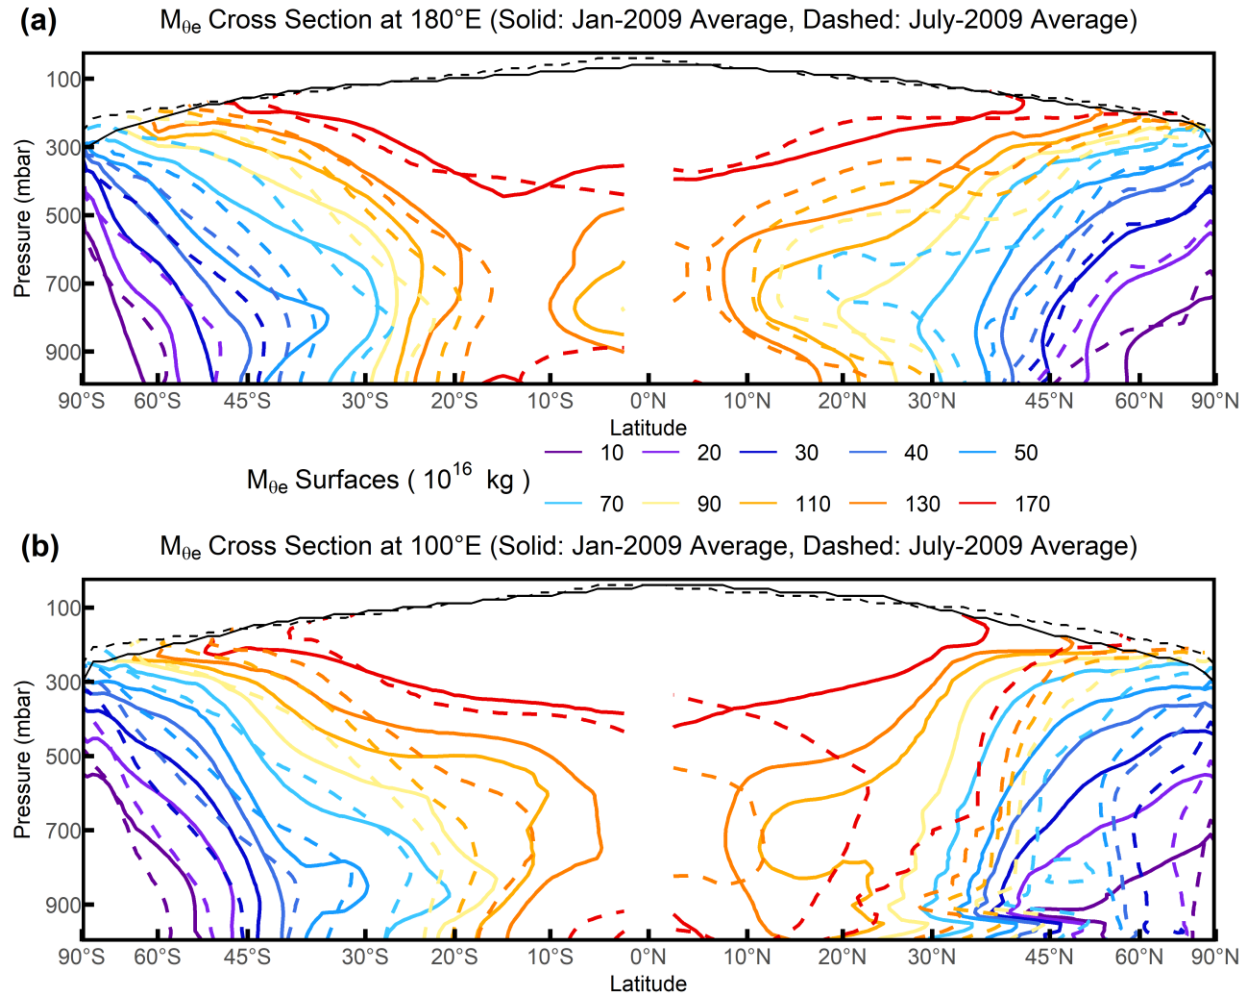

Figure 3: (a)  $M_{\theta_e}$  surfaces at 180°E as Jan-2009 average (solid lines) and July-2009 average (dashed lines). This cross section is mostly over the Pacific Ocean. (b)  $M_{\theta_e}$  surfaces at 100°E as Jan-2009 average (solid lines) and July-2009 average (dashed lines). This cross section is mostly over the Eurasia land in the Northern Hemisphere.  $M_{\theta_e}$  and tropopause are computed from ERA-Interim.

(14) L96/97: This sentence confuses me. To which degree are they parallel? As stated the seasonal cycle is not similar between the two quantities. Do you mean that an  $M_{\theta_e}$  surface between two  $\theta_e$  surfaces is always parallel to these surfaces?

Given a specific  $\theta_e$  surface, the  $M_{\theta_e}$  surface with the given  $\theta_e$  value is parallel to the  $\theta_e$  surface geographically, since the way we compute the  $M_{\theta_e}$  surface is summing all air mass with a lower equivalent potential temperature to the given  $\theta_e$  surface. In other words, on a given  $\theta_e$  surface, the  $M_{\theta_e}$  value has to be the same. To avoid any misleading, we updated the sentence as following.

**L114 – L116:** “By definition, each  $M_{\theta_e}$  surface is exactly aligned with a corresponding  $\theta_e$  surface, and  $M_{\theta_e}$  surfaces have the same characteristics as  $\theta_e$  surfaces, which decrease with latitude and generally increase with altitude.”

(15) L106-108: Is the displacement related to the monsoon circulations over the NH, in particular to the Asian monsoon?

We suspect that this tilting and displacement could be explained by different energy fluxes between land and the ocean, which might be related to the monsoon circulation. From the updated Figure 3, it is also clear that the summer to winter displacement of  $M_{\theta_e}$  surfaces are different between land and ocean.

(16) Discussion about Fig.4 : Are the fractions shown in Fig 4 constant with time?

The mass fraction is almost constant with time with slightly seasonal variation in the lower troposphere and high or low  $M_{\theta_e}$  bands. We added the following sentence for discussion.

**L151 – L154:** “The contribution from the surface to 800 mbar increases as  $M_{\theta_e}$  increases above 120 ( $10^{16}$  kg). The mass fraction shows only small variations with season, with the lower troposphere (Surface to 800 mbar) contributing slightly less in the low  $M_{\theta_e}$  bands and slightly more in the high  $M_{\theta_e}$  bands in the summer, which is closely related to the seasonal tilting of corresponding  $\theta_e$  surfaces.”

(17) L122: Why do you focus on 2009? Has this year been randomly picked?

The choice of 2009 is arbitrary, and mostly because the first year of HIPPO campaign is in the year of 2009. We edited the following:

**L113:** “Figure 2 shows snapshots of the distribution of zonal average  $\theta_e$  and  $M_{\theta_e}$  with latitude and pressure at two arbitrary time slices (1 January 2009, 1 July 2009)”

(18) L123: Is there a known reason why MERRA2 has this low bias? Did you check for differences in the temperature field (i.e., difference in potential temperature) and/or water content?

We use  $M_{\theta_e}$  computed from ERA-Interim as a target to compare with  $M_{\theta_e}$  computed from MERRA2 and NCEP2. Among these two, MERRA2 shows a smaller difference regarding to ERA-Interim. This does not mean MERRA-2 has a low bias but shows that the difference between MERRA2 and ERA-Interim is smaller than the difference between NCEP2 and ERA-Interim. We do not well understand the reason that MERRA2 shows a smaller difference, but we suspect that it is related to the methodology of different reanalysis products.

We also checked the difference in temperature field at the same longitude, latitude and pressure between three reanalysis products. ERA-Interim and MERRA2 generally shows the smallest difference. The standard deviation of this differences in the year of 2009 is 0.72 K between ERA-Interim and MERRA2, which is about half of that (1.47K) between ERA-Interim and NCEP2.

(19) Sec. 3.3: Just a note, ERA-Interim also has temperature tendencies, but I think they are only available for the forecast stream and on model levels.

We thank the reviewer for pointing this out. We need temperature tendencies in the reanalysis rather than forecast.

(20) Fig. 6: Is the deviation between the blue and black curves around end of September/beginning of October a re-occurring event? Or is a random deviation for this year? How does this analysis look for other isentropes, maybe a second example could be given in the supplement? And how is the inter-annual variability?

We thank the reviewer for this interesting question. In response, we repeated the analysis on the 300 K  $\theta_e$  surfaces for another five years (2010-2011, and 2016-2018) and found that this is indeed a re-occurring feature. This feature also occurs on some lower surfaces (e.g. 290 K) but not higher surfaces. We hypothesize that this event is potentially due to the assumption we made  $Q_{mst}$  approximates the sum of  $Q_{ice}$  and  $Q_{evap}$ , and/or the underestimation of cooling of the radiative term or moisture term in the mid- to high latitude in MERRA2. We note that an underestimation of cooling would underestimate the equatorward shift of the  $M_{\theta_e}$  surface, which leads to the underestimation of  $\frac{dM_{\theta_e}}{dt}$ . We now provide further discussion about this feature, and include results for different years and on different moist isentropes in the supplement:

**L210 – L214:** “Figure 7a shows poorer agreement from late August to October, which we also find in other years (Figure S1 and S2), and on lower (e.g.,  $\theta_e = 290K$ , Figure S3) but not higher surfaces (e.g.,  $\theta_e = 310K$ , Figure S4), where the two methods agree better. The poor agreement may reflect a partial breakdown of the assumption that  $Q_{mst}$  approximates the sum of  $Q_{ice}$  and  $Q_{evap}$ , but further analysis is beyond the scope of this study.”

(a)

Year: 2010

$\theta_e$  surface: 300 (K)

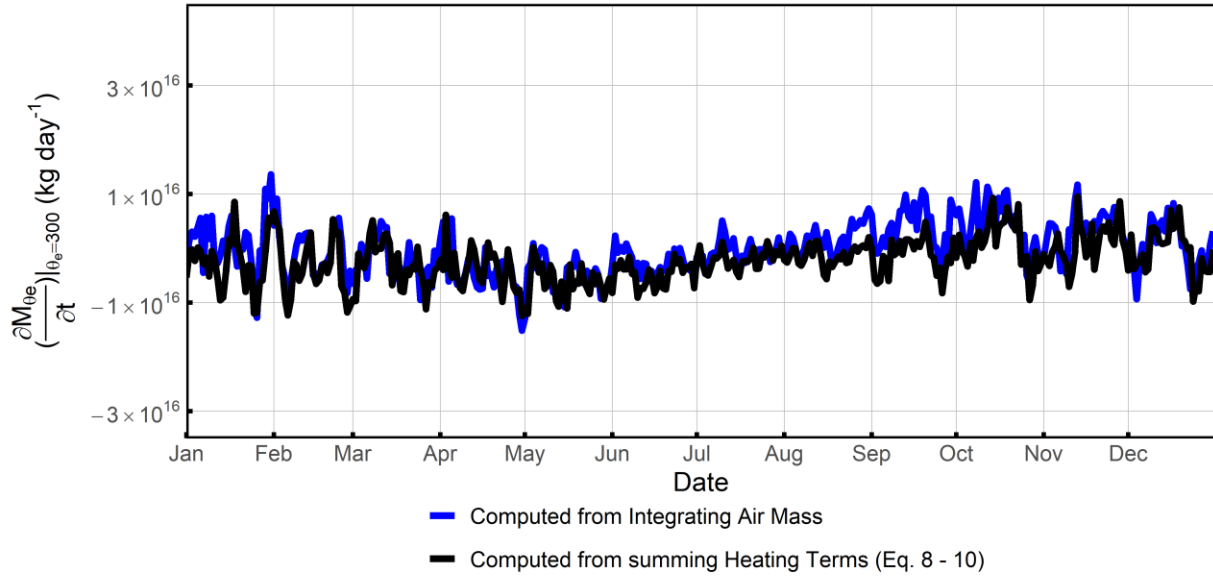

(b)

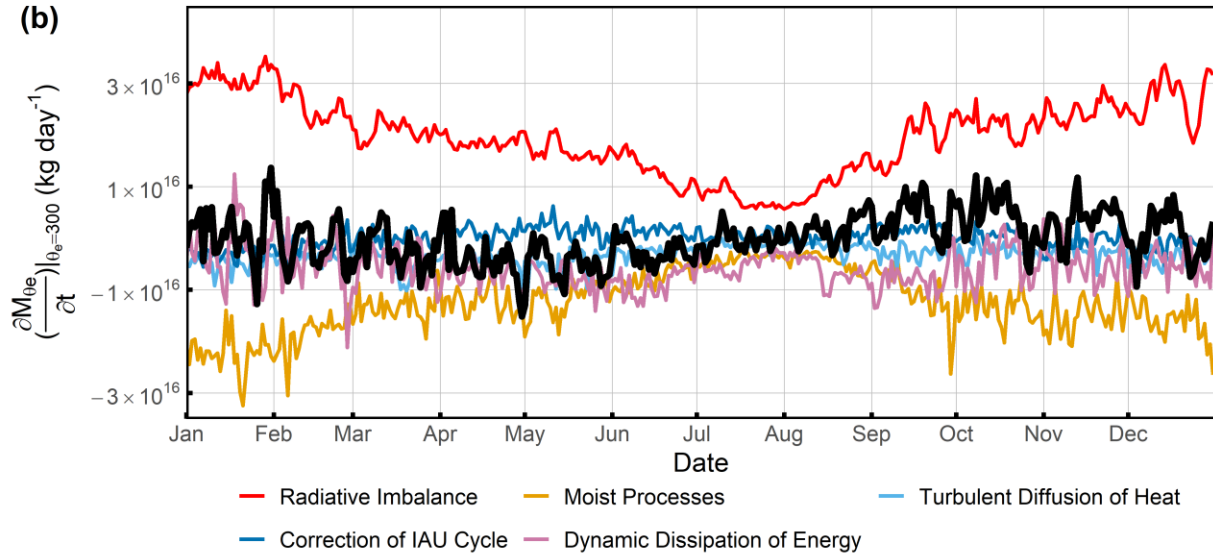

Figure S1: (a) Temporal variation of  $M_{\theta_e}$  in the Northern Hemisphere at  $\theta_e = 300$  K computed by integrating air mass (blue line) and estimated from the sum of five heating terms (Table 1) in MERRA-2 (black line). (b) The heating variables decomposed into five contributions as indicated (see Table 1). Results shown are for year 2010.

(a)

Year: 2011

$\theta_e$  surface: 300 (K)

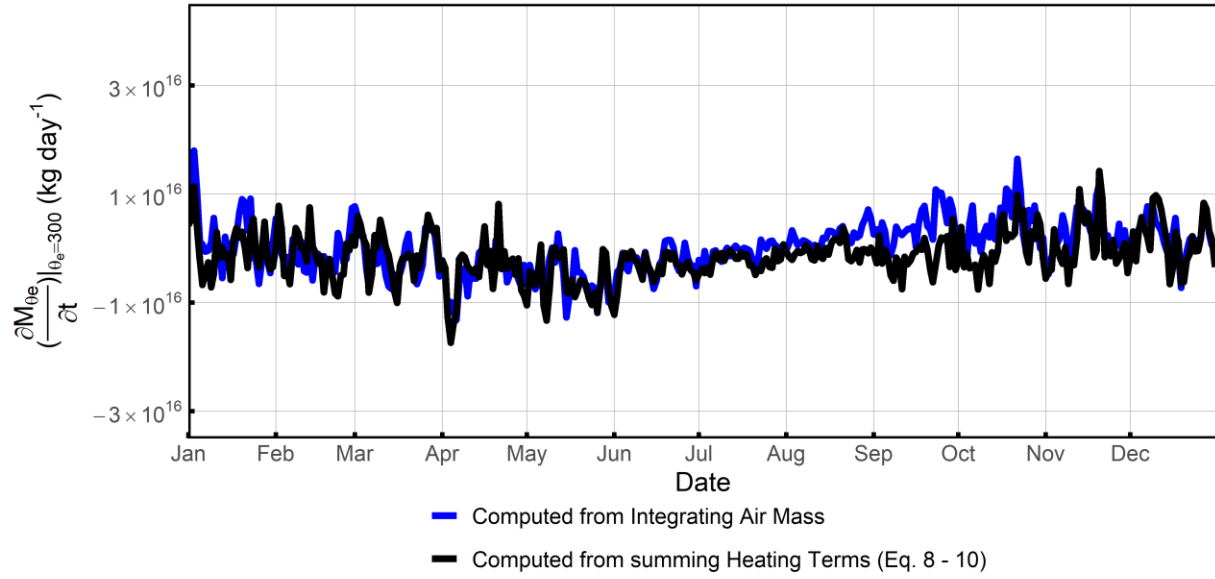

(b)

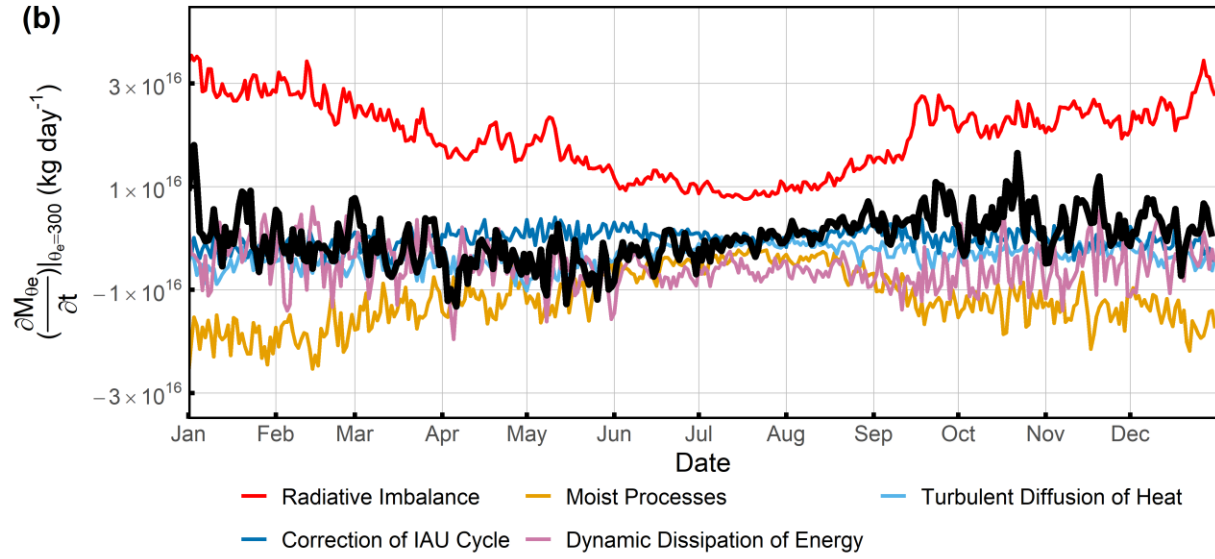

Figure S2: Similar to Figure S1, but for the year of 2011.

(a)

Year: 2009

$\theta_e$  surface: 290 (K)

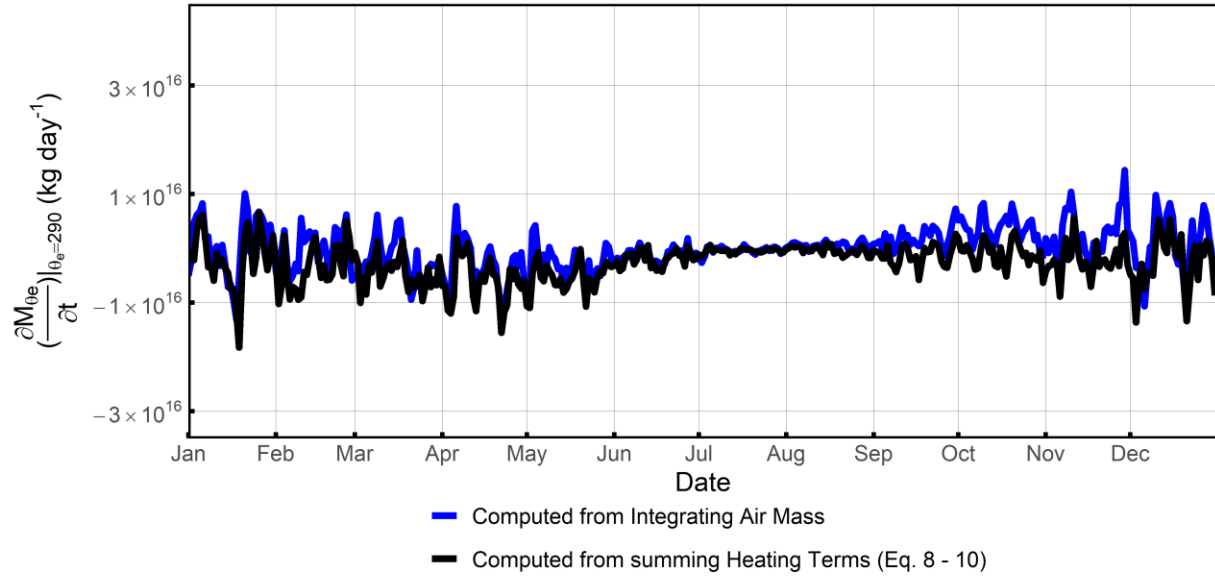

(b)

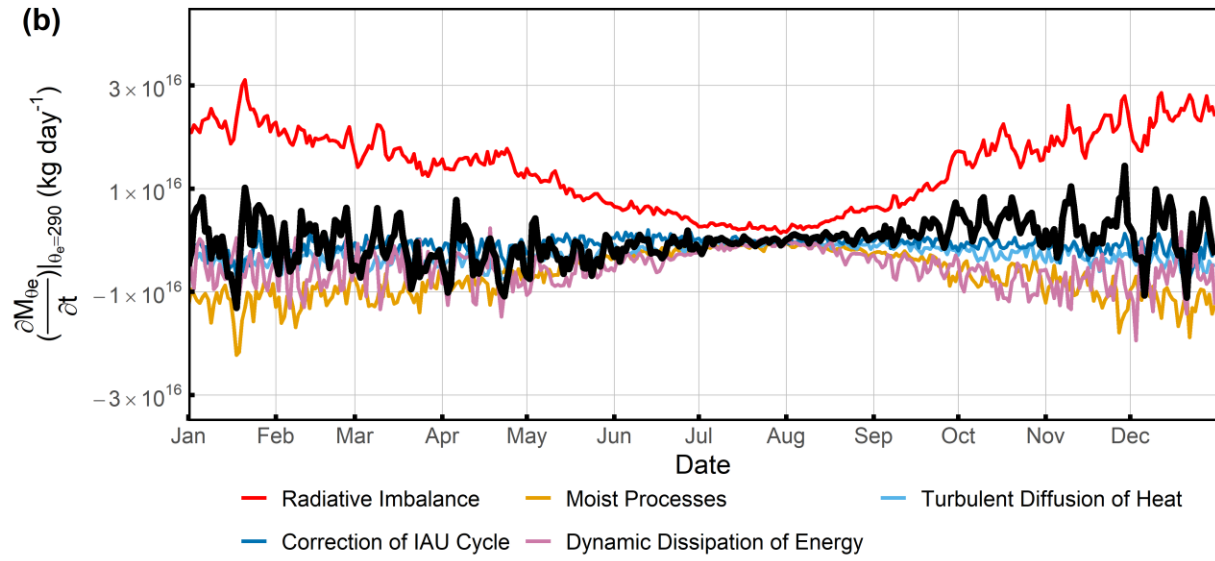

Figure S3: Similar to Figure S1, but for the year of 2009 and on the 290K  $\theta_e$  surface.

(a)

Year: 2009

$\theta_e$  surface: 310 (K)

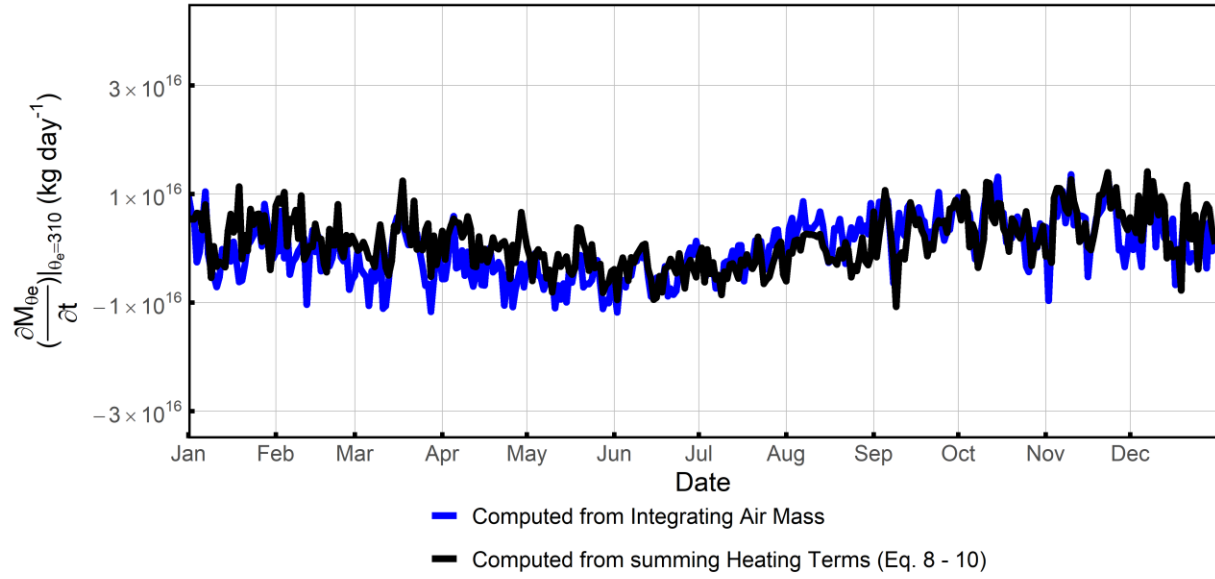

(b)

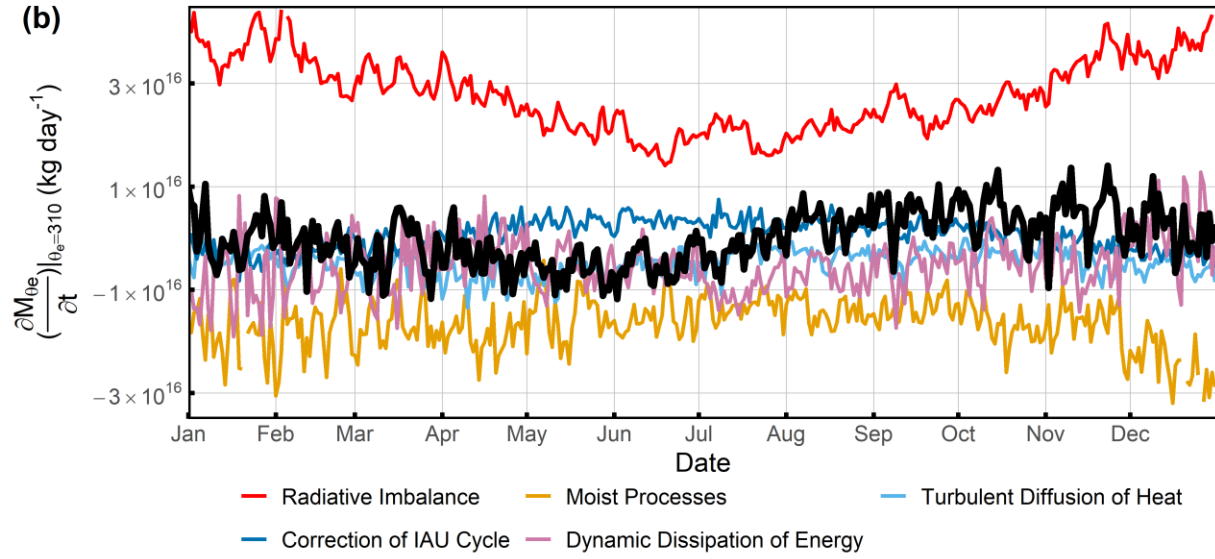

Figure S4: Similar to Figure S3, but on the 310K  $\theta_e$  surface.

(21) L177: What is meant with the term dynamic dissipation of energy?

Dynamic dissipation of energy means the dissipation of the kinetic energy of turbulence (the energy associated with turbulent eddies in a fluid flow). This is the rate at which the turbulence energy is absorbed by breaking the eddies down into smaller and smaller eddies until it is ultimately converted into heat by viscous forces. To avoid any misleading of the word, we replace all ‘Dynamic Dissipation of Energy’ with ‘Dissipation of Kinetic Energy of Turbulence’. This term comes from ‘MERRA-2: File Specification’ (<https://gmao.gsfc.nasa.gov/pubs/docs/Bosilovich785.pdf>).

(22) L191/192: Is there a reference for the NCAR UCATS and the Harvard QCL instruments?

We added reference for the NCAR UCATS and Harvard QCLS instruments.

(23) L193: What is meant with near-surface?

We filtered out all airborne observations within ~ 100 seconds since the take off and within ~ 600 seconds before the landing. This filter is decided manually to discard observation potentially polluted during the take off and landing of the aircraft. We expanded the following sentence:

**L230 - 231:** “Furthermore, we exclude all near-surface observations within ~ 100 seconds of take-offs, within ~ 600 seconds of landings, and missed approaches, which usually show high CO<sub>2</sub> variability due to strong local influences.”

(24) L199: “.” instead of “,” after Figure 7b. Also the blue-red colorscale could be centered at 0.

Thanks. We changed as suggested. The updated figure is shown as following.

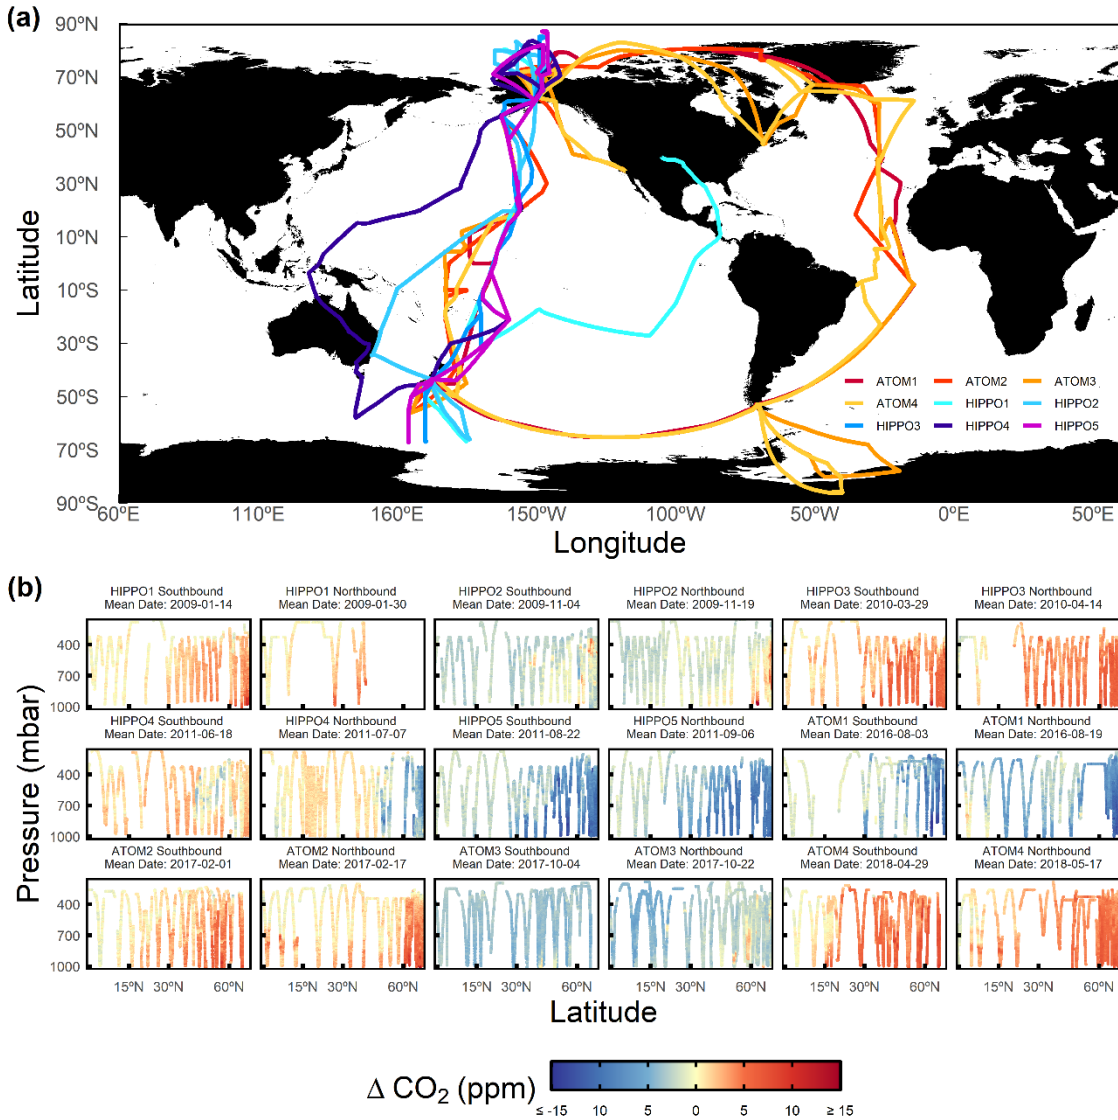

Figure 8: (a) HIPPO and ATom horizontal flight tracks coloured by campaigns. (b) Latitude and pressure cross-section of detrended CO<sub>2</sub> of each airborne campaign transect. CO<sub>2</sub> is detrended by subtracting MLO stiff cubic spline trend, which is computed by a stiff cubic spline function plus 4-harmonic functions with linear gain to MLO record.

(25) L228: Can you say something about why the airborne CO<sub>2</sub> leads by about 10 days?

This comparison uses airborne data from a wide range of  $M_{0e}$  (90 – 110  $10^{16}$  kg) and pressure (500 – 800, mbar), while  $M_0$  and pressure at MLO is about 90 - 100  $10^{16}$  kg and ~ 670 mbar. Therefore, we expect this small difference in amplitude and phase and this difference is within the  $1\sigma$  uncertainty of our estimation of airborne observation. We added following sentences to discuss the difference.

**L266 – L268:** “This small difference is within the  $1\sigma$  uncertainty of our estimation from airborne observation, and some difference is expected, since we choose a  $M_{\theta e}$ -pressure bin wider than the seasonal variation of  $M_{\theta e}$  and pressure at MLO.”

(26) L248: Can say something about how well  $CO_2$  is mixed on a surface of equivalent potential temperature?

Barnes et al. 2016 shows that  $\theta$  contours and  $CO_2$  contours are nearly parallel. Thus, much of synoptic transport is along surfaces of constant potential temperatures. Parazoo et al., 2011 & 2012 and Miyazaki et al., 2008 shows that  $CO_2$  tends to transport fast along moist isentropes especially along the mid-latitude storm track. Our analysis in Figure 13 based on Jena simulation also demonstrates that this assumption is reasonably well.

(27) L256/260: Should the  $CO_2$  be  $\Delta CO_2$ ?

Thanks. We changed as suggested.

(28) L257ff: Can say something about why the inventory is dominated by this  $M_{\theta e}$  fraction?

The inventory here is computed based on the detrended  $CO_2$ , therefore,  $\Delta Inventory$  is largely depended on the seasonal cycle of  $CO_2$ . In the low latitude (high  $M_{\theta e}$ ),  $CO_2$  doesn't deviate as much from its annual mean. In the mid- to high latitude (low  $M_{\theta e}$ ),  $CO_2$  has large seasonal cycle driven by temperate and boreal forests. Therefore,  $\Delta CO_2$  inventory is dominated by the high  $M_{\theta e}$  bands (mid- to high latitude). We added the following sentence.

**L299 – L302:** “The  $\Delta CO_2$  atmospheric inventory is dominated by the domain  $M_{\theta e} < 120$  (mid- to high latitude), which has large  $CO_2$  seasonal cycle driven by temperate and boreal ecosystem, with less than 4.1% contributed by the additional ~38.8% of the air mass outside this domain in the low latitude or upper troposphere (Fig. 11b), where  $\Delta CO_2$  differs less from the detrended baseline, which has been subtracted.”

(29) Figure 11: Please add a horizontal line at 0.

Thanks. We added a light grey grid, for better visualization:

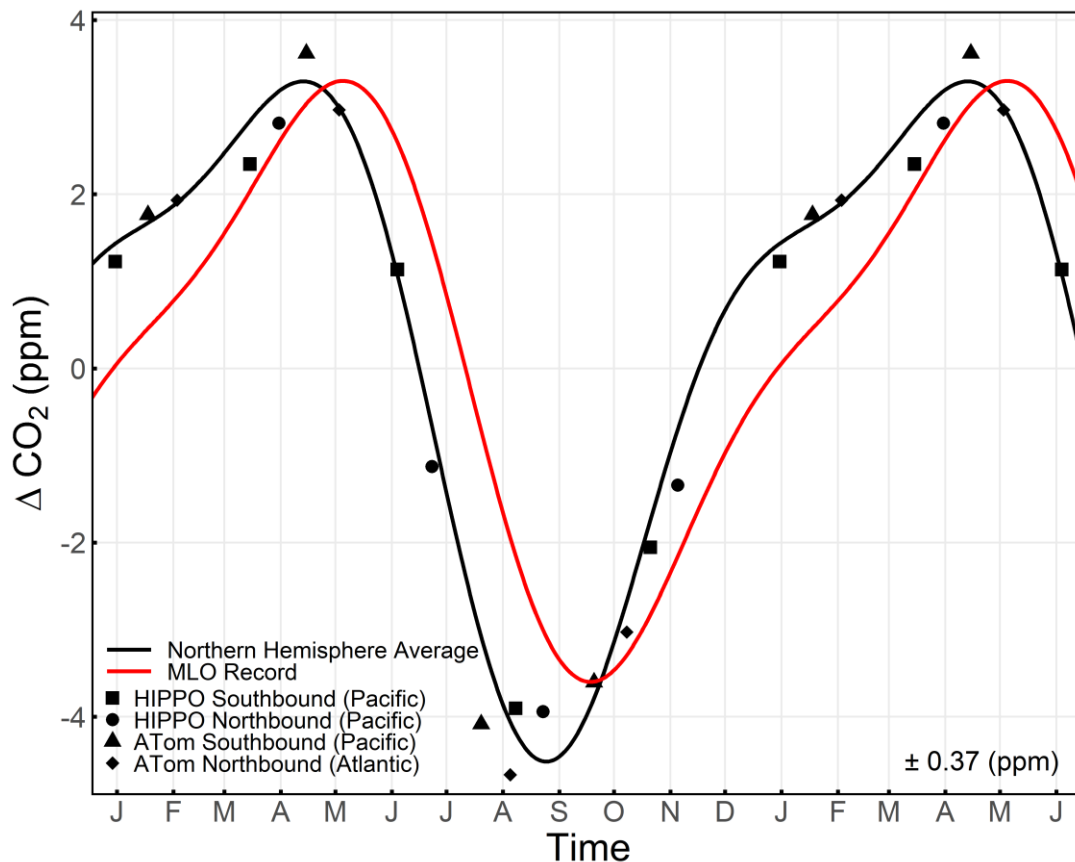

Figure 12: Comparison between the CO<sub>2</sub> seasonal cycle of Northern Hemisphere tropospheric average computed from airborne observation and the M<sub>0</sub> integration method (black points and line) and the mean cycle at MLO measured by Scripps CO<sub>2</sub> Program from 2009 to 2018 (red line). Both are detrended by subtracting a stiff cubic spline trend at MLO. We then compute a mass-weighted average detrended CO<sub>2</sub> for each airborne campaign transect, shown as black points, with campaigns and transects be presented in different shapes. The seasonal cycle of both are computed by a 2-harmonic fit to the detrended time series. The 1 $\sigma$  variability of the detrended average CO<sub>2</sub> values about the fit line is shown on the lower right. The first half year is repeated for clarity.

(30) L264: Which error are you referring to? The difference between the fit and the airborne data? Also would it make sense to add other CO<sub>2</sub> data from the NH, eg. from Barrow to have further points for comparison.

We are referring to the error of our computed Northern Hemisphere mass-weighted average CO<sub>2</sub> seasonal cycle. This is the deviation between our estimation from airborne data and the true average. This error comes from the limited coverage of airborne data in space and time as well as measurement irreproducibility. Since the true average is unknown, we have to simulate a true average in order to estimate the bias. We utilize the atmospheric CO<sub>2</sub> fields from the Jena CO<sub>2</sub> Inversion for this simulation. Since MLO is often viewed as the Northern Hemisphere average, we show the comparison of our estimation and MLO seasonal cycle only to focus on their differences. This comparison is not part of the error estimation. To make this description more clear, we edited the following sentence.

**L307 – 308:** “To address the error in our estimation of Northern Hemisphere mass-weighted average CO<sub>2</sub> seasonal cycle from HIPPO and Atom airborne observation,”

(31) L338: over → below?

Thanks. We changed as suggested.

#### Comments from reviewer 2

(1) The surfaces of  $M_{\theta_e}$  need to be better described. The definition of  $M_{\theta_e}$ , given in Eq. 2, results for e.g. the northern hemisphere in a mass of a volume that encloses the north pole, reaches from the surface to the dynamical tropopause, and has as a southern boundary a specific  $\theta_e$  surface. So the surface of this volume is more than just the southern boundary, and a statement like “ $M_{\theta_e}$  surfaces are always exactly parallel to  $\theta_e$  surfaces” is difficult to understand in this context. Bins of  $M_{\theta_e}$  in this context represent quasi differential volumes, which are more similar to surfaces of  $M_{\theta_e}$ . This should be explained more clearly. May be a 3-D visualization of the complete surface of a given  $M_{\theta_e}$  volume for a specific date would help illustrating this, but I’m nor sure how much distortion there would be due to synoptic disturbances that could make the volume and its surface unrecognizable.

We thank the reviewer for the suggestion. This comment is similar to comment 13 from the first reviewer, in which we’ve provided a detailed reply. We want to reiterate that,  $M_{\theta_e}$  labels the entire volume, but the corresponding  $M_{\theta_e}$  surface represents the upper surface for mass integration. Also, any  $M_{\theta_e}$  surface might intercept the Equator and tropopause. Given the  $\theta_e$  surface, the  $M_{\theta_e}$  surface is parallel to the  $\theta_e$  surface with the same  $\theta_e$  value, therefore, any  $M_{\theta_e}$  surface is parallel to the corresponding  $\theta_e$  surface. We think a 3-D plot would be too noisy to visualize. Alternately, we add a new Figure 3 to show Jan-2009 average and July-2009 average  $M_{\theta_e}$  cross sections at 180E (over the ocean in the Northern Hemisphere) and 100E (over the land in the Northern Hemisphere). For more information, one can refer to our reply to comment 13 of the first reviewer.

(2) L1: The term “inventories” in the title and throughout the manuscript is a bit misleading, as it might be mistaken as e.g. emission inventories. May be the authors can use a different term such as atmospheric abundances or atmospheric burden.

We thank the reviewer for the suggestion. We would use ‘atmospheric inventory’ rather than ‘inventory’ in the title and manuscript. We think this change would make it clear that we are talking about abundances of atmospheric tracer rather than emission inventories.

(3) L199: “Since“ use lower case

The ‘,’ before ‘Since’ should be ‘.’. We have fixed it.

(4) please add a doi wherever possible (e.g. Parazoo et al., 2008 is missing the doi)

We thank the reviewer for pointing it out. We have fixed it.

# A mass-weighted **atmospheric** isentropic coordinate for mapping chemical tracers and computing **atmospheric** inventories

Yuming Jin<sup>1</sup>, Ralph F. Keeling<sup>1</sup>, Eric J. Morgan<sup>1</sup>, Eric Ray<sup>2</sup>, Nicholas C. Parazoo<sup>3</sup>, Britton B. Stephens<sup>4</sup>

<sup>1</sup>Scripps Institution of Oceanography, University of California San Diego, La Jolla, CA 92093, USA

5 <sup>2</sup>National Oceanic and Atmospheric Administration, Boulder, CO 80305, USA

<sup>3</sup>Jet Propulsion Laboratory, California Institute of Technology, Pasadena, CA 91109, USA

<sup>4</sup>National Center for Atmospheric Research, Boulder, CO 80301, USA

*Correspondence to:* Yuming Jin ([y2jin@ucsd.edu](mailto:y2jin@ucsd.edu))

**Abstract.** We introduce a transformed isentropic coordinate  $M_{\theta_e}$ , defined as the dry air mass under a given equivalent potential  
10 temperature surface ( $\theta_e$ ) within a hemisphere. Like  $\theta_e$ , the coordinate  $M_{\theta_e}$  follows the synoptic distortions of the atmosphere,  
but unlike  $\theta_e$ , has a nearly fixed relationship with latitude and altitude over the seasonal cycle. Calculation of  $M_{\theta_e}$  is  
straightforward from meteorological fields. Using observations from the recent HIPPO and ATom airborne campaigns, we  
map the  $\text{CO}_2$  seasonal cycle as a function of pressure and  $M_{\theta_e}$ , where  $M_{\theta_e}$  is thereby effectively used as an alternative to  
latitude. We show that the  $\text{CO}_2$  cycles are more constant as a function of pressure using  $M_{\theta_e}$  as the horizontal coordinate  
15 compared to latitude. Furthermore, short-term variability of  $\text{CO}_2$  relative to the mean seasonal cycle is also smaller when the  
data are organized by  $M_{\theta_e}$  and pressure than when organized by latitude and pressure. We also present a method using  $M_{\theta_e}$  to  
compute mass-weighted averages of  $\text{CO}_2$  on a hemispheric scale. Using this method with the same airborne data and applying  
corrections for limited coverage, we resolve the average  $\text{CO}_2$  seasonal cycle in the Northern Hemisphere (mass weighted  
tropospheric climatological average for 2009-2018), yielding an amplitude of  $7.8 \pm 0.14$  ppm and a downward zero-crossing  
20 at Julian day  $173 \pm 6.1$  (i.e., late June).  $M_{\theta_e}$  may be similarly useful for mapping the distribution and computing inventories of  
any long-lived chemical tracer.

## 1 Introduction

The spatial and temporal distribution of long-lived chemical tracers like  $\text{CO}_2$ ,  $\text{CH}_4$ , and  $\text{O}_2/\text{N}_2$  typically includes regular  
seasonal cycles and gradients with latitude **and pressure** (Conway and Tans, 1999; Ehhalt, 1978; Randerson et al., 1997;  
25 Rasmussen and Khalil, 1981; Tohjima et al., 2012). These patterns are evident in climatological averages but are potentially  
distorted on short time scales by synoptic weather disturbances, especially at middle to high latitudes (i.e. poleward of  $30^\circ$   
N/S) (Parazoo et al., 2008; Wang et al., 2007). With a temporally-dense dataset such as from satellite remote sensing or tower

in-situ measurements, climatological averages can be created by averaging over this variability. For temporally sparse datasets such as from airborne campaigns, it may be necessary to correct for synoptic distortion.

30 A common approach to correct synoptic distortion is to use transformed coordinates rather than geographic coordinates (i.e., pressure-latitude), to take into account atmospheric dynamics and transport barriers. Such coordinate transformation has been used, for example, to reduce dynamically induced variability in the stratosphere using equivalent latitude rather than latitude as horizontal coordinate (Butchart and Remsberg, 1986), to diagnose tropopause profile using tropopause-based rather than surface-based vertical coordinate (Birner et al., 2002), to study transport regime in the Arctic using a horizontal coordinate based on Polar Dome (Bozem et al., 2019), and to study UTLS (Upper Troposphere Lower Stratosphere) tracer data by using tropopause-based, jet-based, and equivalent latitude coordinates (Irina et al., 2019). In the troposphere, a transformed coordinate, isentropic coordinate ( $\theta$ ) has been widely applied to evaluate the distribution of tracer data (Miyazaki et al., 2008; Parazoo et al., 2011, 2012). As air parcels move with synoptic disturbances,  $\theta$  and the tracer tend to be similarly displaced so that the  $\theta$ -tracer relationship is relatively conserved (Keppel-Aleks et al., 2011). Furthermore, vertical mixing tends to be rapid on  $\theta$  surfaces, so  $\theta$  and tracer contours are often nearly parallel (Barnes et al., 2016). However,  $\theta$  varies greatly with latitude and altitude over seasons due to changes in heating and cooling with solar insolation, which complicates the interpretation of  $\theta$ -tracer relationships on seasonal time scales.

During analysis of airborne data from the HIPER Pole-to-Pole Observations (HIPPO) (Wofsy, 2011) and the Atmospheric Tomography Mission (ATom) (Prather et al., 2018) airborne campaigns, we have found it useful to transform potential temperature into a mass-based unit,  $M_\theta$ , which we define as the total mass of dry air under a given isentropic surface in the hemisphere. In contrast to  $\theta$ , which has large seasonal variation,  $M_\theta$  has a more stable relationship to latitude and altitude, while varying in parallel with  $\theta$  on synoptic scales. Also, for a tracer which is well-mixed on  $\theta$ , a plot of this tracer versus  $M_\theta$  can be directly integrated to yield the atmospheric inventory of the tracer, because  $M_\theta$  directly corresponds to the mass of air. We note that a similar concept to  $M_{\theta_e}$  has been introduced in the stratosphere by Linz et al. (2016), in which  $M(\theta)$  is defined as the mass above the  $\theta$  surface, to study the relationship between age of air and diabatic circulation of the stratosphere.

Several choices need to be made in the definition of  $M_\theta$ , including defining boundary conditions (e.g. in altitude and latitude) for mass integration and whether to use potential temperature  $\theta$  or equivalent potential temperature  $\theta_e$ . Here, for boundaries, we use the dynamical tropopause (based on potential vorticity unit, PVU) and the Equator, thus integrating the dry air mass of the troposphere in each hemisphere. We also focus on  $M_\theta$  defined using equivalent potential temperature ( $\theta_e$ ) to conserve moist static energy in the presence of latent heating during vertical motion, which improves alignment between mass transport and mixing especially within storm tracks in mid-latitudes (Parazoo et al., 2011; Pauluis et al., 2008, 2010). We call this tracer  $M_{\theta_e}$ .

In this paper we describe the method for calculating  $M_{\theta_e}$  and discuss its variability on synoptic to seasonal scales. We also discuss the time variation of the  $\theta_e$ - $M_{\theta_e}$  relationship within each hemisphere and explore the stability of  $M_{\theta_e}$  and  $\theta_e$ - $M_{\theta_e}$

60 relationship using different reanalysis products. To illustrate the application of  $M_{\theta_e}$ , we map  $\text{CO}_2$  data from two recent airborne campaigns (HIPPO and ATom) on  $M_{\theta_e}$ . Further, we show how  $M_{\theta_e}$  can be used to accurately compute the average  $\text{CO}_2$  concentration over the entire troposphere of the Northern Hemisphere using measurements from the same airborne campaigns. We examine the accuracy of this method and propose an appropriate way to sample the atmosphere with aircraft to compute the average of a chemical tracer within a large zonal domain.

## 65 2 Methods

### 2.1 Meteorological reanalysis products

The calculation of  $M_{\theta_e}$  requires the distribution of dry air mass and  $\theta_e$ . For these quantities, we alternately use three reanalysis products: ERA-Interim (Dee et al., 2011), NCEP2 (Kanamitsu et al., 2002), and Modern-Era Retrospective analysis for Research and Applications Version 2 (MERRA-2) (Gelaro et al., 2017). All products have  $2.5^\circ$  horizontal resolution. NCEP2 has daily resolution and we average 6-hourly ERA-Interim fields and 3-hourly MERRA-2 fields to yield daily fields. ERA-Interim has 32 vertical levels from 1000 mbar to 1 mbar, with approximately 20 to 27 levels in the troposphere. NCEP2 has 17 vertical levels from 1000 mbar to 10 mbar, with approximately 8 to 12 levels in the troposphere. MERRA-2 has 42 vertical levels from 985 mbar to 0.01 mbar, with approximately 21 to 25 levels in the troposphere.

### 2.2 Equivalent potential temperature ( $\theta_e$ ) and dry air mass ( $M$ ) of the atmospheric fields

75 We compute  $\theta_e$  (K) using the following expression:

$$\theta_e = \left( T + \frac{L_v(T)}{C_{pd}} \cdot w \right) \cdot \left( \frac{P_0}{P} \right)^{\frac{R_d}{C_{pd}}} \quad (1)$$

from Stull (2012).  $T$  (K) is the temperature of air,  $w$  (kg water vapor per kg air mass) is the water vapor mixing ratio,  $R_d$  ( $287.04, \text{J kg}^{-1} \text{K}^{-1}$ ) is the gas constant for air,  $C_{pd}$  ( $1005.7 \text{J kg}^{-1} \text{K}^{-1}$ ) is the specific heat of dry air at constant pressure,  $P_0$  (1013.25, mbar) is the reference pressure at the surface, and  $L_v(T)$  is the latent heat of evaporation at temperature  $T$ .  $L_v(T)$  is defined as  $2406 \text{kJ kg}^{-1}$  at  $40^\circ\text{C}$ , and  $2501 \text{kJ kg}^{-1}$  at  $0^\circ\text{C}$  and scales linearly with temperature.

Following Bolton (1980), we compute water vapor mixing ratio ( $w$ ) from relative humidity (RH,  $\text{kg kg}^{-1}$ ) provided by the reanalysis products and the formula for saturation mixing ratio of water vapor ( $P_{s,v}$ , mbar) modified by Wexler(1976).

$$P_{s,v} = 0.06122 \cdot e^{\frac{17.67 \cdot T}{T+243.5}} \quad (2)$$

$$w = \text{RH} \cdot 0.622 \cdot \frac{P_{s,v}}{P - P_{s,v}} \quad (3)$$

85 We compute the total air mass of each grid cell  $x$  at time  $t$ ,  $M_x(t)$ , shown in Eq. 4, from the product of pressure range and

surface area, and divided by a latitude and height dependent gravity constant provided by Arora et al. (2011). The surface area is computed by using latitude ( $\Phi$ ), longitude ( $\lambda$ ), radius of the earth ( $R$ , 6371 km).

$$M_x = \frac{\Delta P}{g} \cdot |\Delta \sin(\Phi) \cdot \Delta \lambda| \cdot R^2 \quad (4)$$

where  $\Delta$  represents the difference between two boundaries of each grid cell.

90 The gravity constant ( $g$ ,  $\text{kg m}^{-2}$ ) is computed following Arora et al. (2011) as:

$$g(\Phi, h) = g_0 \cdot (1 + 0.0053 \cdot \sin^2(\Phi) - 0.000006 \cdot \sin^2(2 \cdot \Phi)) - 0.000003086 \cdot h \quad (5)$$

where the reference gravity constant ( $g_0$ ) is assumed to be  $9.78046 \text{ m s}^{-2}$ , and the height ( $h$ ) in unit of m is computed from

$$P = P_0 \cdot e^{-\frac{h}{H}} \quad (6)$$

where  $H$  is the scale height of the atmosphere and assumed to be 8400 m.

95 The dry air mass is then computed by subtracting the water mass, computed from relative humidity, saturation water vapor mass mixing ratio, and total air mass of the grid cell. Since this study focuses on tracer distributions in the troposphere, we compute  $M_{\theta_e}$  with an upper boundary at the dynamical tropopause defined as the 2 PVU (potential vorticity units,  $10^{-6} \text{ K kg}^{-1} \text{ m}^2 \text{ s}^{-1}$ ) surface.

100 ERA-Interim and NCEP2 include hypothetical levels below the true land/sea surface, for example, the 850 hPa level over the Himalayan, which we exclude in the calculation of  $M_{\theta_e}$ .

### 2.3 Determination of $M_{\theta_e}$

We show a schematic of the conceptual basis for the calculation of  $M_{\theta_e}$  in Figure 1. To compute  $M_{\theta_e}$ , we sort all tropospheric grid cells in the hemisphere by increasing  $\theta_e$ , and sum the dry air mass over grid cells following

$$M_{\theta_e}(\theta_e, t) = \sum M_x(t)|_{\theta_{e_x} < \theta_e} \quad (7)$$

105 where  $M_x(t)$  is the dry air mass of each grid cell  $x$  at time  $t$ , and  $\theta_{e_x}$  is the equivalent potential temperature of the grid cell. The sum is over all grid cells with  $\theta_{e_x}$  less than  $\theta_e$ .

This calculation yields a unique value of  $M_{\theta_e}$  for each value of  $\theta_e$ . We refer to the relationship between  $\theta_e$  and  $M_{\theta_e}$  as the “ $\theta_e$ - $M_{\theta_e}$  look-up table”, which we generate at daily resolution. We provide this look-up table for each hemisphere computed from ERA-Interim from 1980 to 2018 with daily resolution and from the lowest to the highest  $\theta_e$  surface in the troposphere with 1  
110 K interval (see data availability).

### 3 Characteristics of $M_{\theta_e}$

#### 3.1 Spatial and temporal distribution of $M_{\theta_e}$

Figure 2 shows snapshots of the distribution of zonal average  $\theta_e$  and  $M_{\theta_e}$  with latitude and pressure at two arbitrary time slices (1 January 2009, 1 July 2009).  $M_{\theta_e}$  is not continuous across the Equator because it is defined separately in each hemisphere.

115 By definition, each  $M_{\theta_e}$  surface is exactly aligned with a corresponding  $\theta_e$  surface, and  $M_{\theta_e}$  surfaces have the same characteristics as  $\theta_e$  surfaces, which decrease with latitude and generally increase with altitude. Whereas, the zonal average  $\theta_e$  surfaces vary by up to 20 degrees in latitude over seasons, the meridional displacement of zonal average  $M_{\theta_e}$  is much smaller, with less than 5 degrees in latitude poleward of 30°N/S, as expected, because the zonal average displacement of atmospheric mass over seasons is small. This small seasonal displacement is closely associated with the seasonality of vertical sloping of  $\theta_e$  surfaces (Figure 2). As the mass under each  $M_{\theta_e}$  surface is always constant, the change in tilt must cause the meridional displacement. In the summer, the tilt is steeper (due to increased deep convection) so  $M_{\theta_e}$  surfaces move poleward in the lower troposphere but move equatorward in the upper troposphere.

$M_{\theta_e}$  surfaces at given meridians (Figure 3) in the Northern Hemisphere show clear zonal asymmetry, with larger and more complex displacements compared to the zonal averages, associated with differential heating by land and ocean, and orographic stationary Rossby waves (Hoskins and Karoly, 1981; Wills and Schneider, 2018). For example, over the Northern Hemisphere ocean at 180°E (Figure 3a) and from the summer to winter,  $M_{\theta_e}$  surfaces move poleward in the mid- to high latitude (e.g. poleward of 45°N), but move equatorward in the mid- to low latitude lower troposphere (e.g. equatorward of 45°N, 900 – 700 mbar), with the magnitude smaller than 10 degrees latitude in both. Whereas, over the Northern Hemisphere land at 100°E (Figure 3b) and from the summer to winter,  $M_{\theta_e}$  surfaces moves equatorward by up to 30 degrees latitude, except high latitude middle troposphere (e.g. poleward of 70°N, ~ 500 mbar), where the flat  $M_{\theta_e}$  surfaces lead to slightly poleward displacements. In the Southern Hemisphere, in contrast, the summer to winter displacements of the 180°E and 100°E sections are similar to the zonal average.

At lower latitudes, the zonal averages of  $M_{\theta_e}$  and  $\theta_e$  both exhibit strong secondary maxima near the surface associated with the Hadley circulation (Equatorward of 30° N/S) and in the summer, driven by high water vapor. From the contours in Figure 2, this surface branch of high  $M_{\theta_e}$  and  $\theta_e$  appears disconnected from the upper tropospheric branch. In fact, these two branches are connected through air columns undergoing deep convection, which are not resolved in the zonal means shown in Figure 2, but are resolved in some meridians (e.g. Figure 3a). We also note that, over the land at 100°E (Figure 3b), the two disconnected  $M_{\theta_e}$  and  $\theta_e$  branches in the Northern Hemisphere summer are displaced poleward compared to the zonal average, consistent with a northward shift of intertropical convergence zone (ITCZ) over southern Asia. The existence of these two branches may limit some applications of  $M_{\theta_e}$ , as discussed in Section 4.

Figure 4 shows the zonal average meridional displacement of  $\theta_e$  and  $M_{\theta_e}$  with daily resolution. In summer,  $M_{\theta_e}$  surfaces displace poleward in the lower troposphere but equatorward in the upper troposphere. The displacements in the lower

145 troposphere (925 mbar) are greater in the Northern Hemisphere, where the  $M_{\theta_e} = 140$  ( $10^{16}$  kg) surface, for example, displaces poleward by 10 degrees in latitude between winter and summer (Figure 4b). Beside the seasonal variability, Figure 4 also shows evident synoptic-scale variability.

Since the tilting of  $\theta_e$  surfaces has an impact on the seasonal displacement of  $M_{\theta_e}$  surfaces, the contribution of different pressure levels to the mass of a given  $M_{\theta_e}$  bin must also vary with season. In Figure 5, we show these contributions as two daily snapshots on 1 January 2009 and 1 July 2009. Low  $M_{\theta_e}$  bins consist of air masses mostly below 500 mbar near the Pole. As  $M_{\theta_e}$  increases, the contribution from the upper troposphere gradually increases while the contribution from the surface to 800 mbar decreases to its minimum at  $\sim 100$  to  $120$  ( $10^{16}$  kg). The contribution from the surface to 800 mbar increases as  $M_{\theta_e}$  increases above  $120$  ( $10^{16}$  kg). The mass fraction shows only small variations with season, with the lower troposphere (Surface to 800 mbar) contributing slightly less in the low  $M_{\theta_e}$  bands and slightly more in the high  $M_{\theta_e}$  bands in the summer, which is closely related to the seasonal tilting of corresponding  $\theta_e$  surfaces.

### 3.2 $\theta_e$ - $M_{\theta_e}$ relationship

155 Figure 6 compares the temporal variation of  $M_{\theta_e}$  of several given  $\theta_e$  surfaces (i.e.,  $\theta_e$ - $M_{\theta_e}$  look-up table) computed from different reanalysis products for 2009. The deviations are indistinguishable between ERA-Interim and MERRA-2, except near  $\theta_e = 340$  K, where MERRA-2 is systematically lower than ERA-Interim by 1.5 to 6.5 ( $10^{16}$  kg). NCEP2 shows slightly larger deviations from ERA-Interim, but less than 8.5 ( $10^{16}$  kg). The products are highly consistent in seasonal variability, and they also show agreement on synoptic time scales. The small difference between products is expected because of different resolutions and methods (Mooney et al., 2011). We expect these differences would be negligible for most applications of  $M_{\theta_e}$ .

Figure 6 shows that, in both hemispheres,  $M_{\theta_e}$  reaches its minimum in summer and maximum in winter for a given  $\theta_e$  surface, with the largest seasonality at the lowest  $\theta_e$  (or  $M_{\theta_e}$ ) values. The seasonality decreases as  $\theta_e$  increases, following the reduction in the seasonality of shortwave absorption at lower latitudes (Li and Leighton, 1993). The seasonality is smaller in the Southern Hemisphere, consistent with the larger ocean area and hence greater heat capacity and transport (Fasullo and Trenberth, 2008; Foltz and McPhaden, 2006). Figure 6 also shows that  $M_{\theta_e}$  has significant synoptic-scale variability but smaller than the seasonal variability. Synoptic variability is typically larger in winter than summer, as discussed below.

### 3.3 Relationship to diabatic heating and mass fluxes

A key step of the application of  $M_{\theta_e}$  for interpreting tracer data is the generation of the look-up table that relates  $\theta_e$  and  $M_{\theta_e}$ . In this section, we address a tangential question of what controls the temporal variation of the look-up table, which is not necessary for the application but may be of fundamental meteorological interest.

As shown in Appendix A, the temporal variation of the lookup table,  $\dot{M}_{\theta_e} = \frac{\partial}{\partial t} M_{\theta_e}(\theta_e, t)$ , can be related to underlying mass and heat fluxes according to

$$\dot{M}_{\theta_e} = -\frac{1}{C_{pd}} \frac{\partial Q_{dia}(\theta_e, t)}{\partial \theta_e} + m_T(\theta_e, t) + m_E(\theta_e, t) \quad (8)$$

where  $\frac{\partial Q_{dia}(\theta_e, t)}{\partial \theta_e}$  ( $J s^{-1} K^{-1}$ ) is the effective diabatic heating, integrated over the full  $\theta_e$  surface per unit width in  $\theta_e$ ,  $m_T(\theta_e, t)$  ( $kg s^{-1}$ ) is the net mass flux across the tropopause and  $m_E(\theta_e, t)$  ( $kg s^{-1}$ ) is the net mass flux across the Equator, including all air with equivalent potential temperature less than  $\theta_e$ .  $Q_{dia}$  has contributions from internal heating without ice formation ( $Q'_{int}$ ), heating from ice formation ( $Q_{ice}$ ), sensible heating from the surface ( $Q_{sen}$ ), surface evaporation ( $Q_{evap}$ ), turbulent diffusion of heat ( $Q_{diff}$ ), and turbulent transport of water vapor ( $Q_{H_2O}$ ) following

$$Q_{dia}(\theta_e, t) = Q'_{int}(\theta_e, t) + Q_{ice}(\theta_e, t) + Q_{sen}(\theta_e, t) + Q_{evap}(\theta_e, t) + Q_{diff}(\theta_e, t) + Q_{H_2O}(\theta_e, t) \quad (9)$$

The terms  $Q_{evap}$  and  $Q_{H_2O}$  are expressed as heating rates by multiplying the underlying water fluxes by  $L_v(T)/C_{pd}$ . In order to quantify the dominant processes contributing to temporal variation of  $M_{\theta_e}$ , the terms in Eqs. 8 and 9 must be linked to diagnostic variables available in the reanalysis or model products. Although there was no perfect match with any of the three reanalysis products, MERRA-2 provides temperature tendencies for individual processes, which can be converted to heating rates per Eq. 9 following

$$\frac{\partial Q_i(\theta_e, t)}{\partial \theta_e} = \frac{C_{pd}}{\Delta \theta_e} \sum_x \left( \frac{dT}{dt} \right)_{x,i} M_x \quad (10)$$

where  $i$  refers a specific process ( $Q'_{int}$ ,  $Q_{ice}$ , etc.),  $\left( \frac{dT}{dt} \right)_x$  ( $K s^{-1}$ ) is the temperature tendency of grid cell  $x$ ,  $M_x$  ( $kg$ ) is the mass of grid cell  $x$ , and  $\Delta \theta_e$  is the width of the  $\theta_e$  surface.

There are 5 heating terms provided in the MERRA-2 product, which we can approximately relate to terms in Eq. 9, as shown in Table 1. The first three terms ( $Q_{rad}$ ,  $Q_{dyn}$ , and  $Q_{ana}$ ) can be summed to yield  $Q'_{int}$ , the forth ( $Q_{trb}$ ) is equal to the sum of  $Q_{diff}$  and  $Q_{sen}$ , and the fifth ( $Q_{mst}$ ) approximates the sum of  $Q_{ice}$  and  $Q_{evap}$ . MERRA-2 does not provide terms corresponding to  $Q_{H_2O}$  or  $Q_{evap}$  but  $Q_{mst}$  represents heating due to moist processes, which includes  $Q_{ice}$  plus water vapor evaporation/condensation within the atmosphere. This water vapor evaporation/condensation should be approximately equal to  $Q_{evap}$  with small time lag when integrated over a  $\theta_e$  surface because mixing is preferentially along the  $\theta_e$  surface and water vapor released into a  $\theta_e$  surface by surface evaporation will tend to transport and precipitate from the same  $\theta_e$  surface within a short time period (Bailey et al., 2019). Thus, the MERRA-2 term for heating by moist processes should approximate  $Q_{ice} + Q_{evap}$ .

Figure 7a compares the temporal variation of  $\dot{M}_{\theta_e}$  computed by integrating dry air mass (i.e.,  $\theta_e$ - $M_{\theta_e}$  look-up table) with  $M_{\theta_e}$  computed from the sum of the diabatic heating terms from MERRA-2 (via Eq. 8 to Eq. 10). The comparison focuses on the  $\theta_e = 300$  K surface, which does not intersect with the Equator or tropopause, so that the two mass flux terms ( $m_T$ ,  $m_E$ ) vanish.

200 These two methods have a high correlation at 0.71. We do not expect perfect agreement because  $M_{\theta_e}$  computed by the sum of heating neglects turbulent water vapor transport, and only approximates  $Q_{\text{evap}}$  as discussed above. This relatively good agreement nevertheless demonstrates that the formulation based on MERRA-2 heating terms includes the dominant processes that drive temporal variations in the look-up table. Figure 7a shows poorer agreement from late August to October, which we also find in other years (Figure S1 and S2), and on lower (e.g.,  $\theta_e = 290\text{K}$ , Figure S3) but not higher surfaces (e.g.,  $\theta_e = 310\text{K}$ , Figure S4), where the two methods agree better. The poor agreement may reflect a partial breakdown of the assumption that  $Q_{\text{mst}}$  approximates the sum of  $Q_{\text{ice}}$  and  $Q_{\text{evap}}$ , but further analysis is beyond the scope of this study.

Figure 7b further breaks down the sum of the heating terms in Eq. 8 and 9 from MERRA-2 into individual components. Each term clearly displays variability on synoptic to seasonal scales. To quantify the contribution of different terms on the different time scales, we separate each term into a seasonal and synoptic component, where the seasonal component is derived by a two-harmonic fit with constant offset and the synoptic component is the residual. We estimate the fractional contribution of each heating term on seasonal and synoptic time scales separately in Table 2, using the method in Supplementary S1. On the seasonal time scale, the variance is dominated by radiative heating and cooling of the atmosphere and the moist processes (including both ice formation and extra water vapor from surface evaporation) together, with prominent counteraction between each other. On the synoptic time scale, dissipation of kinetic energy of turbulence dominates the variance.

215 Similar analyses on different  $\theta_e$  surfaces and in different years (Figure S1 to S4) all show that combination of radiative heating and moist processes dominates the temporal variation of  $M_{\theta_e}$  on the seasonal time scale, while dissipation of kinetic energy of turbulence dominates on the synoptic time scale.

#### 4 Applications of $M_{\theta_e}$ as an atmospheric coordinate

To illustrate the potential application of  $M_{\theta_e}$  for interpreting sparse data, we focus on the seasonal cycle of  $\text{CO}_2$  in the Northern Hemisphere as resolved by two series of global airborne campaigns, HIPPO and ATom. HIPPO consisted of five campaigns between 2009 and 2011 and ATom consisted of four campaigns between 2016 and 2018. Each campaign covered from  $\sim 150$  m to  $\sim 14000$  m and from nearly Pole to Pole, along both northbound and southbound transects. On HIPPO, both transects were over the Pacific Ocean, while on ATom, southbound transects were over the Pacific Ocean and northbound transects were over the Atlantic Ocean. The flight tracks are shown in Figure 8a. We aggregate data from each campaign into northbound and southbound transects within each hemisphere, but only use data from the Northern Hemisphere. We only consider tropospheric observations by excluding measurements from the stratosphere, which is defined by observed water vapor less than 50 ppm and either  $\text{O}_3$  greater than 150 ppb or detrended  $\text{N}_2\text{O}$  to the reference year of 2009 less than 319 ppb. Water vapor and  $\text{O}_3$  were measured by the NOAA UCATS (UAS Chromatograph for Atmospheric Trace Species, Hurst) instrument and were interpolated to 10-sec resolution.  $\text{N}_2\text{O}$  was measured by the Harvard QCLS (Quantum Cascade Laser System, Santoni et al., 2014) instrument. Furthermore, we exclude all near-surface observations within  $\sim 100$  seconds of take-offs, within  $\sim 600$

seconds of landings, and missed approaches, which usually show high CO<sub>2</sub> variability due to strong local influences. In-situ measurements of CO<sub>2</sub> were made by 3 different instruments on both HIPPO and Atom. Of these, we use the CO<sub>2</sub> measurements made by the NCAR Airborne Oxygen Instrument (AO2) with a 2.5 seconds measurement interval (Stephens et al., 2020), for consistency with planned future applications to APO (atmospheric potential oxygen) computed from AO2. The differences between instruments are small for our application (Santoni et al., 2014). The data used in this study are averaged to 10-sec resolution and we show the detrended CO<sub>2</sub> values along each airborne campaign transect for the Northern Hemisphere in Figure 8b. Since we focus on the seasonal cycle of CO<sub>2</sub>, all airborne observations are detrended by subtracting an interannual trend fitted to CO<sub>2</sub> measured at the Mauna Loa Observatory (MLO) by the Scripps CO<sub>2</sub> Program. This trend is computed by a stiff cubic spline function plus 4-harmonic terms with linear gain to the MLO record.  $M_{\theta e}$  is computed from ERA-Interim in this section.

#### 4.1 Mapping Northern Hemisphere CO<sub>2</sub>

A conventional method to display seasonal variations in CO<sub>2</sub> from airborne data is to plot time series of the data at a given location or latitude and different pressure levels (Graven et al., 2013; Sweeney et al., 2015). In Figure 9, we compare this method using HIPPO and ATom airborne data, binning and averaging the data from each airborne campaign transect by pressure and latitude bins, with our new method, binning the data by pressure and  $M_{\theta e}$ . For each latitude bin, we choose a corresponding  $M_{\theta e}$  bin which has approximately the same meridional coverage in the lower troposphere. We remind the reader that  $M_{\theta e}$  decreases poleward, while also generally increasing with altitude (Figures 2 to 4).

As shown in Figure 9, the transect average of detrended CO<sub>2</sub> (shown as points) from both binning methods resolve well-defined seasonal cycles (based on 2-harmonic fit) in all bins, with higher amplitudes near the surface (low pressure) and at high latitude (low  $M_{\theta e}$ ). However, binning by  $M_{\theta e}$  leads to much smaller variations of the mean seasonal cycle (shown as solid curves) with pressure, as expected, because moist isentropes are preferential surfaces of mixing. Also, within individual pressure bins, the short-term variability relative to the mean cycles based on the distribution of all detrended observations (not shown as points but denoted as  $1\sigma$  values in Figure 9) is smaller when binning by  $M_{\theta e}$  (F-test,  $p < 0.01$ ), except in the lower troposphere of the highest  $M_{\theta e}$  bin (90-110  $10^{16}$  kg). The smaller short-term variability is expected because  $M_{\theta e}$  tracks the synoptic variability of the atmosphere. When binning by latitude, the smallest short-term variability is found at the lowest bin (surface-800 mbar) and the largest short-term variability is found in the highest bin (500 mbar-tropopause), except the highest latitude bin (45° N-55° N). When binning by  $M_{\theta e}$ , in contrast, the short-term variability in the middle pressure bin is always smaller than the higher and lower pressure bins (F-test,  $p < 0.01$ ), except for the 50 to 70  $M_{\theta e}$  bin, where the difference between the lowest and middle pressure bins is not significant (based on  $1\sigma$  levels). The lower variability in the mid troposphere may reflect the suppression of variability from synoptic disturbances, leaving a clearer signal of the influence of surface fluxes of CO<sub>2</sub> and stratosphere-troposphere exchanges. We compare the variance of detrended airborne observations within each  $M_{\theta e}$ -

pressure bin with its fitted value. The fitted seasonal cycle of each bin explains 63.2% to 90.5% of the variability for different bins, with higher fractions in the middle troposphere.

Figure 9 also shows the CO<sub>2</sub> seasonal cycle at MLO, which falls within a single  $M_{\theta_e}$ -pressure bin (90-110  $10^{16}$  kg, 500-800 mbar) at all seasons. Although the airborne data in this bin span a wide range of latitudes ( $\sim 10^\circ$  N- $75^\circ$  N), the seasonal cycle averaged over this bin is very similar to the cycle at MLO (airborne cycle leads by  $\sim 10$  days with 1.0% lower amplitude). This small difference is within the  $1\sigma$  uncertainty of our estimation from airborne observation, and some difference is expected, since we choose a  $M_{\theta_e}$ -pressure bin wider than the seasonal variation of  $M_{\theta_e}$  and pressure at MLO.

It is also of interest to examine how CO<sub>2</sub> data from surface stations fit into the framework based on  $M_{\theta_e}$ . Figure 10 compares the CO<sub>2</sub> seasonal cycle of five NOAA surface stations (Dlugokencky et al., 2019) with the cycle from the airborne observations binned into selected  $M_{\theta_e}$  bins. These surface stations are chosen to be representative of different  $M_{\theta_e}$  ranges. For the comparison, we chose  $M_{\theta_e}$  bins that span the seasonal maximum and minimum  $M_{\theta_e}$  value of the station. These bins are narrower than the bins used in Figure 9, in order to sharply focus on the latitude of the station. To maximize sampling coverage, we bin the airborne data only by  $M_{\theta_e}$  without pressure sub-bins. For mid- and high latitude surface stations (right three panels), the seasonal amplitude of station CO<sub>2</sub> and corresponding airborne CO<sub>2</sub> are close (within 4–5%), while airborne cycles lag by 2–3 weeks. The lag presumably represents the slow mixing from the mid-latitude surface to the high latitude mid-troposphere (Jacob, 1999). In contrast, for low latitude stations (left two panels) which generally sample trade winds, the seasonal cycles differ significantly, indicating that the air sampled at these stations is not rapidly mixed along surfaces of constant  $M_{\theta_e}$  or  $\theta_e$  with air aloft. As mentioned above (Section 3.1), surfaces of high  $M_{\theta_e}$  within the Hadley circulation have two branches, one near the surface and one aloft. A timescale of several months for transport from the lower to the upper branch can be estimated from the known overturning flows based on air mass flux streamfunctions (Dima and Wallace, 2003). This delay, plus strong mixing and diabatic effects (Miyazaki et al., 2008), ensures that the lower and upper branches are not well connected on seasonal time scales. Our results nevertheless demonstrate that the  $M_{\theta_e}$  framework combining airborne and surface data could help understand details of atmospheric transport both along and across  $\theta_e$  surfaces.

## 4.2 Computing the hemispheric mass-weighted average CO<sub>2</sub> mole fraction

We next illustrate the use of  $M_{\theta_e}$  for computing the mass-weighted average of a long-lived chemical tracer by performing this exercise for CO<sub>2</sub> in the Northern Hemisphere. We calculate the Northern Hemisphere tropospheric mass-weighted average CO<sub>2</sub> from each airborne transect using a method that assumes that CO<sub>2</sub> is uniformly mixed on  $\theta_e$  surfaces throughout the hemisphere (Barnes et al., 2016; Parazoo et al., 2011, 2012). We exclude airborne observation from HIPPO-1 Northbound due to the lack of data north of  $40^\circ$  N. We use the  $\theta_e$ - $M_{\theta_e}$  lookup table of the corresponding date to assign a value of  $M_{\theta_e}$  to each observation based on its  $\theta_e$ . The observations for each transect are then sorted by  $M_{\theta_e}$ . The hemispheric average CO<sub>2</sub> is calculated by trapezoidal integration of CO<sub>2</sub> as a function of  $M_{\theta_e}$  and divided by the total dry air mass as computed from the corresponding range of  $M_{\theta_e}$ .

To illustrate the  $M_{0e}$  integration method, we choose HIPPO-1 Southbound and show  $CO_2$  measurements and  $\Delta CO_2$  atmospheric inventory (Pg) as a function of  $M_{0e}$  in Figure 11. The Northern Hemisphere tropospheric average detrended  $\Delta CO_2$  is computed by integrating the area under the curve (subtracting negative contributions) and dividing by the maximum value of  $M_{0e}$  within the hemisphere (here  $195.13 \times 10^{16}$  kg). This yields a mass-weighted average detrended  $\Delta CO_2$  of 1.13 ppm for the full troposphere of the Northern Hemisphere. The trapezoidal integration has a high accuracy because the data are dense over  $M_{0e}$ . The  $\Delta CO_2$  atmospheric inventory is dominated by the domain  $M_{0e} < 120$  (mid- to high latitude), which has large  $CO_2$  seasonal cycle driven by temperate and boreal ecosystem, with less than 4.1% contributed by the additional ~38.8% of the air mass outside this domain in the low latitude or upper troposphere (Fig. 11b), where  $\Delta CO_2$  differs less from the detrended baseline, which has been subtracted.

We compute a Northern Hemisphere mass-weighted average detrended  $\Delta CO_2$  for each airborne campaign transect and fit the time series to a 2-harmonic fit to estimate the seasonal cycle (Figure 12). We find that the cycle has a seasonal amplitude of 7.9 ppm and a downward zero-crossing at Julian day 179, where the latter is defined as the date when the detrended seasonal cycle changes from positive to negative.

To address the error in our estimation of Northern Hemisphere mass-weighted average  $CO_2$  seasonal cycle from HIPPO and Atom airborne observation, we consider two main sources: (1) irreproducibility in the  $CO_2$  measurements and (2) limited coverage in space and time. For the first contribution, we compute the difference between mass-weighted average  $CO_2$  from AO2 and mean mass-weighted average  $CO_2$  from Harvard QCLS, Harvard OMS, and NOAA Picarro for each airborne campaign transect, while masking values that are missing in any of these datasets. We compute the standard deviation of these differences ( $\pm 0.15$  ppm) for mass-weighted average  $CO_2$  of each airborne campaign transect as the  $1\sigma$  level of uncertainty. We further compute the uncertainties for the seasonal amplitude of  $\pm 0.11$  ppm and for the downward zero-crossing of  $\pm 0.83$  days, which are calculated from 1000 iterations of the 2-harmonic fit, allowing for random Gaussian uncertainty ( $\sigma = \pm 0.15$  ppm) for each transect.

For the contribution to the error in the amplitude and phase from limited space/time coverage, we use simulated  $CO_2$  data from the Jena  $CO_2$  Inversion Run ID: s04oc v4.3 (Rödenbeck et al., 2003). This model includes full atmospheric fields from 2009 to 2018, which we detrend using the cubic spline fit to the observed MLO trend. From these detrended fields, we compute the climatological cycle of the Northern Hemisphere average by integrating over all tropospheric grid cells (cutoff at  $PVU = 2$ ) to produce a daily time series of the hemispheric mean, which we take as the model “truth”. We fit a 2-harmonic function to this “true” time series to compute a “true” climatological cycle over the 2009-2018 period (Table 3), which is our target for validation. We then subsample the Jena  $CO_2$  Inversion along the HIPPO and ATom flight tracks and process the data similarly to the observations, using the  $M_{0e}$  integration method and a 2-harmonic fit. The comparison shows that the  $M_{0e}$  integration method yields an amplitude which is 1% too large and yields a downward zero-crossing date which is 6 days too late. We view these offsets as systematic biases, which we correct from the observed amplitude and phase reported above. The uncertainties

in these biases are hard to quantify, but we take  $\pm 100\%$  as a conservative estimate. We thus allow an additional random error of  $\pm 0.08$  ppm in amplitude and  $\pm 6.0$  days in downward zero crossing for uncertainty in the bias. Combining the random and systematic error contributions leads to a corrected Northern Hemisphere tropospheric average CO<sub>2</sub> seasonal cycle amplitude of  $7.8 \pm 0.14$  ppm and downward zero-crossing of  $173 \pm 6.1$  days. This corrected cycle is an estimate of the climatological average from 2009 to 2018.

The error due to limited space/time coverage can be divided into three components: limited seasonal coverage (17 transects over the climatological year), limited interannual coverage (sampling particular years instead of all years), and limited spatial coverage (under-sampling the full hemisphere). We quantify the combined biases due to both limited seasonal and interannual coverage by comparing the two-harmonic fit of the full “true” daily time series of the hemispheric mean to a two-harmonic fit of that data subsampled on the actual mean sampling dates of the 17 flight tracks. We isolate the bias associated with limited seasonal coverage by repeating this calculation, replacing the “true” daily time series with the daily climatological cycle. The bias associated with limited spatial coverage is quantified as the residual. Combining these results, we estimate that the limited seasonal, interannual, and spatial coverage, account for biases in the downward zero-crossing of 1.1, 1.4, and 3.5 days respectively, all in the same direction (too late). The seasonal amplitude bias due to individual components are all small ( $< 0.5\%$ ).

It is of some interest to compare our estimate of the Northern Hemisphere average cycle with the cycle at Mauna Loa, which is also broadly representative of the hemisphere. Our comparison in Figure 12 shows small but significant differences in both amplitude and phase, with the MLO amplitude being  $\sim 11.5\%$  smaller than the hemispheric average and lagging in phase by  $\sim 1$  month. There are also differences in the shape of the cycle, with the MLO cycle rising more slowly from October to February, but more quickly from February to May. These features at least partly reflect variations in the transport of air masses to the station (Harris et al., 1992; Harris and Kahl, 1990).

In Figure 13, we compare the  $M_{\theta_e}$  integration method with an alternate latitude-pressure weighted average method, with no correction for synoptic variability. For this method, we bin flight track subsampled Jena CO<sub>2</sub> Inversion data into  $\sin(\text{latitude})$ -pressure bins with 0.01 and 25 mbar as intervals respectively, while all bins without data are filtered. We further compute a weighted average CO<sub>2</sub> for each airborne campaign transect. The root-mean-square errors (RMSE) to the true average of the  $M_{\theta_e}$  integration method are  $\pm 0.32$  and  $\pm 0.27$  ppm for HIPPO and ATom campaigns, respectively, which are smaller than the RMSE of the simple latitude-pressure weighted average method at  $\pm 0.82$  and  $\pm 0.53$  ppm.

We also evaluate the biases in the hemispheric average season cycles computed with the simple latitude-pressure weighted average method. As summarized in Table 3, the latitude-pressure weighted average method yields a larger error in seasonal amplitude ( $M_{\theta_e}$  method 1.0 % too large, latitude-pressure method 20.8% too large), while both methods show similar phasing error (6 to 7 days late). The larger error associated with the latitude-pressure weighted average method is consistent with strong influence of synoptic variability. This synoptic variability could potentially be corrected using model simulations of the 3-

dimensional CO<sub>2</sub> fields (Bent, 2014). The  $M_{\theta_e}$  integration method appears advantageous because it accounts for synoptic variability, and easily yields a hemispheric average by directly integrating over  $M_{\theta_e}$ .

360 The relative success of the  $M_{\theta_e}$  integration method in yielding accurate hemispheric averages using HIPPO and ATom data is attributable partly to the extensive data coverage. To explore the coverage requirement for reliably resolving hemispheric averages, we also test the integration method when applied to simulated data with lower coverage. We start with the same coverage as for ATom and HIPPO but select only subsets of the points in four groups: poleward of 30° N, Equator to 30° N, surface to 600 mbar, and 600 mbar to tropopause. We also examine whether we can only utilize observation along the Pacific

365 transect by excluding measurements along the Atlantic transects (ATom northbound). We further explore the impact of reduced sampling density by subsampling the Jena CO<sub>2</sub> Inversion based on the spatial coverage of the Medusa sampler, which is an airborne flask sampler that collected 32 cryogenically dried air samples per flight during HIPPO and ATom (Stephens et al., submitted to AMTD, 2020). We further randomly retain 10%, 5%, and 1% of the full flight track subsampled data, repeating each ratio with 1000 iterations. We compute the detrended average CO<sub>2</sub> from these nine simulations by the  $M_{\theta_e}$  integration

370 method and then compute the RMSE relative to the detrended true hemispheric average, together with the seasonal magnitude and day of year of the downward zero-crossing, as summarized in Table 3. HIPPO-1 Northbound is excluded in all these simulations. The number of data points of each simulation and number of observations of the original HIPPO and ATom data sets are summarized in Table S1. These results show that limiting sampling to either equatorward or poleward of 30° N yields significant error (24.3% smaller and 24.9% larger seasonal amplitude, respectively). Additionally, there is a ~ 25 days lag in

375 phase if sampling is limited to equatorward of 30° N. However, restricting sampling to be exclusively above or below 600 mbar, or only along the Pacific transect does not lead to significant errors. Randomly reducing the sampling by 10- to 100-fold or only keeping Medusa spatial coverage also have minimal impact. This suggests that, to compute the average CO<sub>2</sub> of a given region, it may be sufficient to have low sampling density provided that the measurements adequately cover the full range in  $\theta_e$  (or  $M_{\theta_e}$ ).

## 380 5 Discussion and summary

We have presented a transformed isentropic coordinate,  $M_{\theta_e}$ , which is the total dry air mass under a given  $\theta_e$  surface in the troposphere of the hemisphere.  $M_{\theta_e}$  can be computed from meteorological fields by integrating dry air mass under a specific  $\theta_e$  surface, and different reanalysis products show a high consistency. The  $\theta_e$ - $M_{\theta_e}$  relationship varies seasonally due to seasonal heating/cooling of the atmosphere via radiative heating and moist processes. The seasonality in the relationship is greater at

385 low  $\theta_e$  compared to high  $\theta_e$ , and is greater in the Northern than the Southern Hemisphere. The  $\theta_e$ - $M_{\theta_e}$  relationship also shows synoptic-scale variability, which is mainly driven by the dissipation of kinetic energy of turbulence.  $M_{\theta_e}$  surfaces show much less seasonal displacement with latitude and altitude than surfaces of constant  $\theta_e$ , while being parallel and exhibiting essentially identical synoptic scale variability. As a coordinate for mapping tracer distributions,  $M_{\theta_e}$  shares with  $\theta_e$  the advantages of following displacements due to synoptic disturbances and aligning with surfaces.  $M_{\theta_e}$  has the additional advantage of being

390 approximately fixed in space seasonally, which allows mapping to be done on seasonal time scales, and having units of mass, which provides a close connection with atmospheric inventories.

As a coordinate,  $M_{\theta_e}$  is probably better viewed as an alternative to latitude, due to its nearly fixed relationship with latitude over season, rather than as an alternative to altitude (or pressure), as typically done for potential temperature (Miyazaki et al., 2008; Miyazaki and Iwasaki, 2005; Parazoo et al., 2011; Tung, 1982; Yang et al., 2016). Even though the contours of constant  
395  $M_{\theta_e}$  extend over a wide range of latitudes (from low latitudes at the Earth surface to high latitudes aloft), a close association with latitude is provided by the point of contact with Earth's surface. Also,  $M_{\theta_e}$  is nearly always monotonic with latitude (increasing equatorward) while it is not necessarily monotonic with altitude in the lower troposphere (Figure 2 and 3).

As a first application, we have illustrated using  $M_{\theta_e}$  to map the seasonal variation of  $\text{CO}_2$  in the Northern Hemisphere, using data from the HIPPO and ATom airborne campaigns. This application shows that  $M_{\theta_e}$  has several advantages as a coordinate  
400 compared to using latitude: (1) variations in  $\text{CO}_2$  with pressure are smaller at fixed  $M_{\theta_e}$  than at fixed latitude, and (2) the scatter about the mean  $\text{CO}_2$  seasonal cycle is smaller when sorting data into pressure/ $M_{\theta_e}$  bins than into pressure/latitude bins. We have also shown that, at middle and high latitudes, the  $\text{CO}_2$  seasonal cycles that are resolved in the airborne data (binned by  $M_{\theta_e}$  but not pressure) are very similar to the cycles observed at surface stations at the appropriate latitude, with a phase lag of  $\sim 2$  to 3 weeks. At lower latitudes,  $\text{CO}_2$  cycles in the airborne data (binned similarly by  $M_{\theta_e}$ ) are less consistent with surface  
405 data, as expected due to slow transport and diabatic processes within the Hadley Circulation. For characterizing the patterns of variability in airborne  $\text{CO}_2$  data, we expect the advantages of  $M_{\theta_e}$  over latitude will be greatest for sparse datasets, allowing data to be binned more coarsely with pressure or elevation while still resolving features of large-scale variability, such as seasonal cycles or gradients with latitude.

As a second application, we use  $M_{\theta_e}$  to compute the Northern Hemisphere tropospheric average  $\text{CO}_2$  from the HIPPO and  
410 ATom airborne campaigns by integrating  $\text{CO}_2$  over  $M_{\theta_e}$  surfaces. With a small correction for systematic biases induced by limited hemispheric coverage of the HIPPO and ATom flight tracks, we report a seasonal amplitude of  $7.8 \pm 0.14$  ppm and a downward zero-crossing at Julian day  $173 \pm 6.1$ . This hemispheric average cycle may prove valuable as a target for validation of models of surface  $\text{CO}_2$  exchange.

Our analysis also clarifies that computing hemispheric averages with the  $M_{\theta_e}$  integration method depends on adequate spatial  
415 coverage. The coverage provided by the HIPPO and ATom campaigns appears more than adequate for computing the average seasonal cycle of  $\text{CO}_2$  in the Northern Hemisphere, and the errors for this application remain small if the coverage is limited to either above or below 600 mbar, or reduced to retain only 1% of the measurements. Most critical is maintaining coverage in latitude, or  $M_{\theta_e}$  surfaces. The  $M_{\theta_e}$  integration method of computing hemispheric averages assumes that the tracer is uniformly distributed and instantly mixed on  $\theta_e$  ( $M_{\theta_e}$ ) surfaces. We have shown that systematic gradients in  $\text{CO}_2$  are resolved with pressure  
420 at fixed  $M_{\theta_e}$ , which reflects the finite rates of dispersion on  $\theta_e$  surfaces. Further improvements to the integration method seem possible by integrating separately over different pressure levels, taking account of the different mass fraction in different

pressure bins (e.g. Figure 5). The need is especially relevant for high  $M_{\theta_e}$  bins which are less completely mixed, and which tend to intersect the Equator or have separate surface branches. For these  $M_{\theta_e}$  bins, it would be more appropriate to integrate over  $M_\theta$  in the upper and lower atmosphere separately. This complication is of minor importance for computing the mass-weighted average  $\text{CO}_2$  cycle, because the cycle of  $\text{CO}_2$  is small in these air masses.

The definition of  $M_{\theta_e}$  requires horizontal and vertical boundaries for the integration of dry air mass. We use the dynamic tropopause (based on PVU) and the Equator as boundaries, which is appropriate for integrating tropospheric inventories in a hemisphere. Other boundaries may be more appropriate for other applications. For example,  $M_{\theta_e}$  could be computed from the lowest  $\theta_e$  surface in the Southern Hemisphere with a latitude cutoff at  $30^\circ\text{S}$ , to apply to airborne observations only over the Southern Ocean. On the other hand, the boundary choice only influences  $M_{\theta_e}$  surfaces that actually intercept the boundaries, making the choice less important at high latitude in the lower troposphere (lowest  $M_{\theta_e}$  surfaces). Some tropospheric applications may also benefit by integrating over dry potential temperature ( $\theta$ ) rather than  $\theta_e$ .

Based on our promising results for  $\text{CO}_2$ , we expect that  $M_{\theta_e}$  may be usefully applied as a coordinate for mapping and computing atmospheric inventories of many tracers, such as  $\text{O}_2/\text{N}_2$ ,  $\text{N}_2\text{O}$ ,  $\text{CH}_4$ , and the isotopes of  $\text{CO}_2$ , whose residence time is long compared to the time scale for mixing along isentropes.  $M_{\theta_e}$  may also prove useful in the design phase of airborne campaigns to ensure strategic coverage. Our results show that, to study the seasonal cycle of a tracer on a hemispheric scale, it is critical to have well-distributed sampling in  $M_{\theta_e}$ .

## 6 Code availability

We provide R code to generate  $\theta_e$ - $M_{\theta_e}$  look-up tables from ERA-Interim meteorological fields at <https://github.com/yumingjin0521/Mtheta>.

## 7 Data availability

All HIPPO 10-sec merge data are available from: [https://doi.org/10.3334/CDIAC/HIPPO\\_010](https://doi.org/10.3334/CDIAC/HIPPO_010) (Wofsy et al., 2017b). Besides, all HIPPO Medusa merge data are available from: [http://dx.doi.org/10.3334/CDIAC/hippo\\_014](http://dx.doi.org/10.3334/CDIAC/hippo_014) (Wofsy et al., 2017a). All ATom 10-sec and Medusa merges data are available from: <https://doi.org/10.3334/ORNLDAAC/1581> (Wofsy et al., 2018).

$\text{CO}_2$  data from Mauna Loa Observatory are available from the Scripps  $\text{CO}_2$  Program at: <https://scrippsco2.ucsd.edu>. Other surface station  $\text{CO}_2$  data, including Trinidad Head, Cold Bay, Barrow, Cape Kumukahi, Sand Island are provided by NOAA/ESRL GMD flask sampling network (<http://www.cmdl.noaa.gov/ccgg/trends>) and downloaded from Observation Package (ObsPack) at <http://dx.doi.org/10.25925/20190812> (Dlugokencky et al., 2019).

The Jena  $\text{CO}_2$  Inversion are available at the project website: <http://www.bgc-jena.mpg.de/CarboScope/s/main.html>. Run ID: s04oc v4.3 was used in this study.

ERA-Interim is available at: <https://www.ecmwf.int/en/forecasts/datasets/reanalysis-datasets/era-interim>. NCEP2 is available at: <https://psl.noaa.gov/data/gridded/data.ncep.reanalysis2.html>. MERRA-2 is available at the NASA Goddard Earth Sciences (GES) Data and Information Services Center (DISC) at: <https://disc.gsfc.nasa.gov/datasets?keywords=%22MERRA-2%22&page=1&source=Models%2FAnalyses%20MERRA-2>.

455  $\theta_e$ - $M_{\theta_e}$  look-up tables with daily resolution and 1 K intervals in  $\theta_e$  from 1980 to 2018 computed from ERA-Interim are available at <https://github.com/yumingjin0521/Mtheta>.

## 8 Appendix A: Temporal variation of $M_{\theta_e}$

Following Walin's derivation for cross-isothermal volume flow in the ocean (Walin, 1982), we show how  $\dot{M}_{\theta_e} = \frac{\partial}{\partial t} M_{\theta_e}(\theta_e, t)$  can be related to energy and mass fluxes. We start by deriving the relationship for  $M_\theta$  (based on potential temperature  $\theta$ ) but  
460 later generalize to apply to  $M_{\theta_e}$ .

All definitions are summarized in Table A1, and Figure A1 is the schematic diagram of mass and energy flux.

All mass and heat fluxes are counted positive as into region  $R(\theta, t)$ . The heat fluxes through tropopause, Equator and surface of region  $R(\theta, t)$  can be divided into **an advective ( $F(\theta, t)$ ) and a turbulent ( $D(\theta, t)$ ) component**. Integrating over the tropopause and equatorial boundary, we have:

$$465 \quad Q_T(\theta, t) = C_{pd} \int_{-\infty}^{\theta} \frac{\partial F_T(\theta', t)}{\partial \theta'} \theta' d\theta' + \int_{-\infty}^{\theta} \frac{\partial D_T(\theta', t)}{\partial \theta'} d\theta' \quad (A1)$$

$$Q_E(\theta, t) = C_{pd} \int_{-\infty}^{\theta} \frac{\partial F_E(\theta', t)}{\partial \theta'} \theta' d\theta' + \int_{-\infty}^{\theta} \frac{\partial D_E(\theta', t)}{\partial \theta'} d\theta' \quad (A2)$$

$$Q_I(\theta, t) = C_{pd} \cdot F_I(\theta, t) \cdot \theta + D_I(\theta, t) \quad (A3)$$

where  $C_{pd}$  is the heat capacity of dry air in units of  $J \text{ kg}^{-1} \text{ K}^{-1}$ .

Based on the continuity of mass and energy for region  $R(\theta, t)$ , we obtain

$$470 \quad \begin{aligned} \frac{\partial}{\partial t} M_\theta(\theta, t) &= F_T(\theta, t) + F_E(\theta, t) + F_I(\theta, t) \\ &= \int_{-\infty}^{\theta} \frac{\partial F_T(\theta', t)}{\partial \theta'} d\theta' + \int_{-\infty}^{\theta} \frac{\partial F_E(\theta', t)}{\partial \theta'} d\theta' + F_I(\theta, t) \end{aligned} \quad (A4)$$

$$C_{pd} \frac{\partial}{\partial t} \int_{-\infty}^{\theta} \frac{\partial M_\theta(\theta', t)}{\partial \theta'} \theta' d\theta' = Q_T(\theta, t) + Q_E(\theta, t) + Q_I(\theta, t) + \int_{-\infty}^{\theta} \frac{\partial Q_s(\theta', t)}{\partial \theta'} d\theta' + \int_{-\infty}^{\theta} \frac{\partial Q_{int}(\theta', t)}{\partial \theta'} d\theta' \quad (A5)$$

Substituting Eq. A1 to Eq. A3 into Eq. A5 and differentiating with respect to  $\theta$  yields

$$C_{pd}\theta \frac{\partial}{\partial t} \frac{\partial M_\theta(\theta, t)}{\partial \theta} = C_{pd}\theta \left( \frac{\partial F_T(\theta, t)}{\partial \theta} + \frac{\partial F_E(\theta, t)}{\partial \theta} + \frac{\partial F_I(\theta, t)}{\partial \theta} \right) + C_{pd}F_I(\theta, t) + \frac{\partial Q_{diff}(\theta, t)}{\partial \theta} + \frac{\partial Q_s(\theta, t)}{\partial \theta} + \frac{\partial Q_{int}(\theta, t)}{\partial \theta} \quad (A6)$$

475 where,

$$Q_{diff}(\theta, t) = \int_{-\infty}^{\theta} \frac{\partial D_T(\theta', t)}{\partial \theta'} d\theta' + \int_{-\infty}^{\theta} \frac{\partial D_E(\theta', t)}{\partial \theta'} d\theta' + D_I(\theta, t) \quad (A7)$$

Differentiating Eq. A4 with respect to  $\theta$ , and multiplying  $C_{pd} \cdot \theta$  yields

$$C_{pd}\theta \frac{\partial}{\partial t} \frac{\partial M_\theta(\theta, t)}{\partial \theta} = C_{pd}\theta \left( \frac{\partial F_T(\theta, t)}{\partial \theta} + \frac{\partial F_E(\theta, t)}{\partial \theta} + \frac{\partial F_I(\theta, t)}{\partial \theta} \right) \quad (A8)$$

Subtracting Eq. A8 from Eq. A6, we obtain

$$480 \quad C_{pd}F_I(\theta, t) = -\frac{\partial Q_{diff}(\theta, t)}{\partial \theta} - \frac{\partial Q_s(\theta, t)}{\partial \theta} - \frac{\partial Q_{int}(\theta, t)}{\partial \theta} \quad (A9)$$

Eq. A9 divided by  $C_{pd}$  plus Eq. A4 yields

$$\frac{\partial}{\partial t} M_\theta(\theta, t) = -\frac{1}{C_{pd}} \left( \frac{\partial Q_{diff}(\theta, t)}{\partial \theta} + \frac{\partial Q_s(\theta, t)}{\partial \theta} + \frac{\partial Q_{int}(\theta, t)}{\partial \theta} \right) + \int_{-\infty}^{\theta} \frac{\partial F_T(\theta', t)}{\partial \theta'} d\theta' + \int_{-\infty}^{\theta} \frac{\partial F_E(\theta', t)}{\partial \theta'} d\theta' \quad (A10)$$

Eq. A10 illustrates the temporal variation of  $M_\theta$ , where  $Q_{int}$  includes radiative heating (i.e. sum of shortwave and longwave heating), **dissipation of kinetic energy of turbulence**, and latent heat release due to evaporation and condensation.

485 To modify Eq. A10 to apply to  $M_{\theta_e}$  rather than  $M_\theta$ , it is necessary to replace all  $\theta$  with  $\theta_e$ , and additionally account for the following:

1. Condensation and evaporation is conserved on the  $\theta_e$  surfaces, but the gaining and losing of water vapor through surface evaporation and water vapor transport contributes to  $\theta_e$ . This contribution can be computed as the product of latent heat of evaporation and the extra water vapor content. Thus, the surface contribution ( $Q_s$ ) needs to include both sensible heating of the atmosphere ( $Q_{sen}$ ) and the water vapor flux from the surface into the atmosphere ( $Q_{evap}$ ). Similarly, the diffusion term within the atmosphere ( $Q_{diff}$ ) needs to include both heat and water vapor ( $Q_{H_2O}$ ).

2. Internal heating ( $Q_{int}$ ) needs to exclude latent heat releasing due to evaporation and condensation of liquid water, which cancel in  $\theta_e$ , but it still needs to include heating from ice formation, which does not cancel in  $\theta_e$ . We subtract this ice component from the rest of the internal heating, yielding two terms  $Q'_{int}$  and  $Q_{ice}$ , with  $Q_{int} = Q'_{int} + Q_{ice}$ .

495 Therefore, we can write the temporal variation of  $M_{\theta_e}$  as

$$\frac{\partial}{\partial t} M_{\theta_e}(\theta_e, t) = \int_{-\infty}^{\theta_e} \frac{\partial F_T(\theta'_e, t)}{\partial \theta'_e} d\theta'_e + \int_{-\infty}^{\theta_e} \frac{\partial F_E(\theta'_e, t)}{\partial \theta'_e} d\theta'_e - \frac{1}{C_{pd}} \left( \frac{\partial Q_{diff}(\theta_e, t)}{\partial \theta_e} + \frac{\partial Q_{sen}(\theta_e, t)}{\partial \theta_e} + \frac{\partial Q_{evap}(\theta_e, t)}{\partial \theta_e} + \frac{\partial Q'_{int}(\theta_e, t)}{\partial \theta_e} + \frac{\partial Q_{ice}(\theta_e, t)}{\partial \theta_e} + \frac{\partial Q_{H_2O}(\theta_e, t)}{\partial \theta_e} \right) \quad (A11)$$

## 9 Authors contributions

YJ carried out the data analysis and derivations. Initial drafts were prepared by YJ and RFK, with additional contributions from all co-authors.

## 500 10 Competing interests

The authors declare that they have no conflict of interest.

## 11 Acknowledgements

The original  $M_{\theta_e}$  concept arose out of discussions during the ORCAS field campaign that included Ralph Keeling, Colm Sweeney, Eric Kort, Matthew Long, and Martin Hoecker-Martinez. We would like to acknowledge the efforts of the full  
505 HIPPO and ATom science teams and the pilots and crew of the NCAR/NSF GV and NASA DC-8, the NCAR and NASA project managers, field support staff, and logistics experts. In this work, we have used the HIPPO and ATom 10-sec merge files, supported by the National Center for Atmospheric Research (NCAR). NCAR is sponsored by the National Science Foundation under Cooperative Agreement No. 1852977. The HIPPO program was supported by NSF grants ATM-0628575, ATM-0628519 and ATM-0628388 to Harvard University, University of California San Diego, NCAR, and the University of  
510 Colorado/CIRES. The ATom program was supported by the NASA grant NNX15AJ23G. Medusa and AO2 measurements on ATom were supported NSF grants AGS-1547797 and AGS-1623748 to University of California San Diego and NCAR. YJ and EJM are also supported under AGS-1623748. We thank the Harvard QCLS, Harvard OMS, NOAA UCATS and NOAA Picarro teams for sharing measurements. We thank NOAA ESRL GML for providing surface station CO<sub>2</sub> data measured at Trinidad Head, Cold Bay, Barrow, Cape Kumukahi, and Sand Island. We thank Christian Rödenbeck for sharing Jena CO<sub>2</sub>  
515 Inversion run.

Any opinions, findings, and conclusions or recommendations expressed in this material are those of the authors and do not necessarily reflect the views of the National Science Foundation.

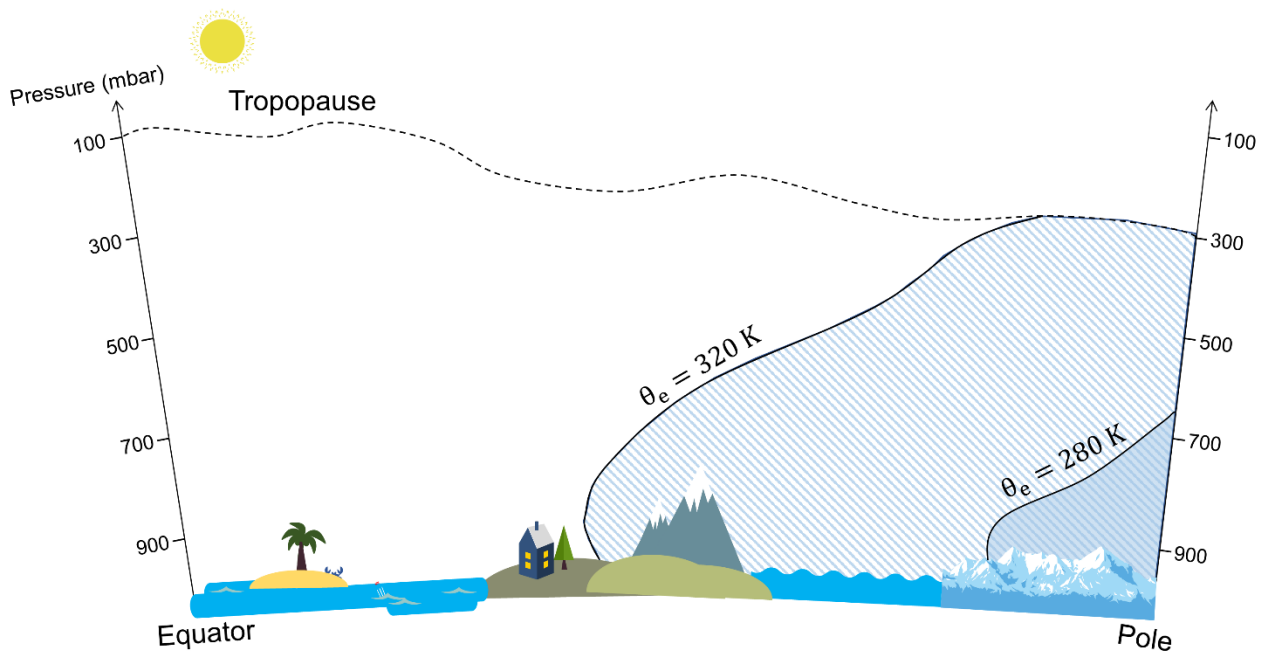

520 **Figure 1: Schematic of the conceptual basis to calculate  $M_{\theta_e}$ .  $M_{\theta_e}$  of a given  $\theta_e$  surface is computed by summing all dry air mass with a low equivalent potential temperature in the troposphere of the hemisphere. This calculation yields a unique  $\theta_e$ - $M_{\theta_e}$  relation at a given time point.**

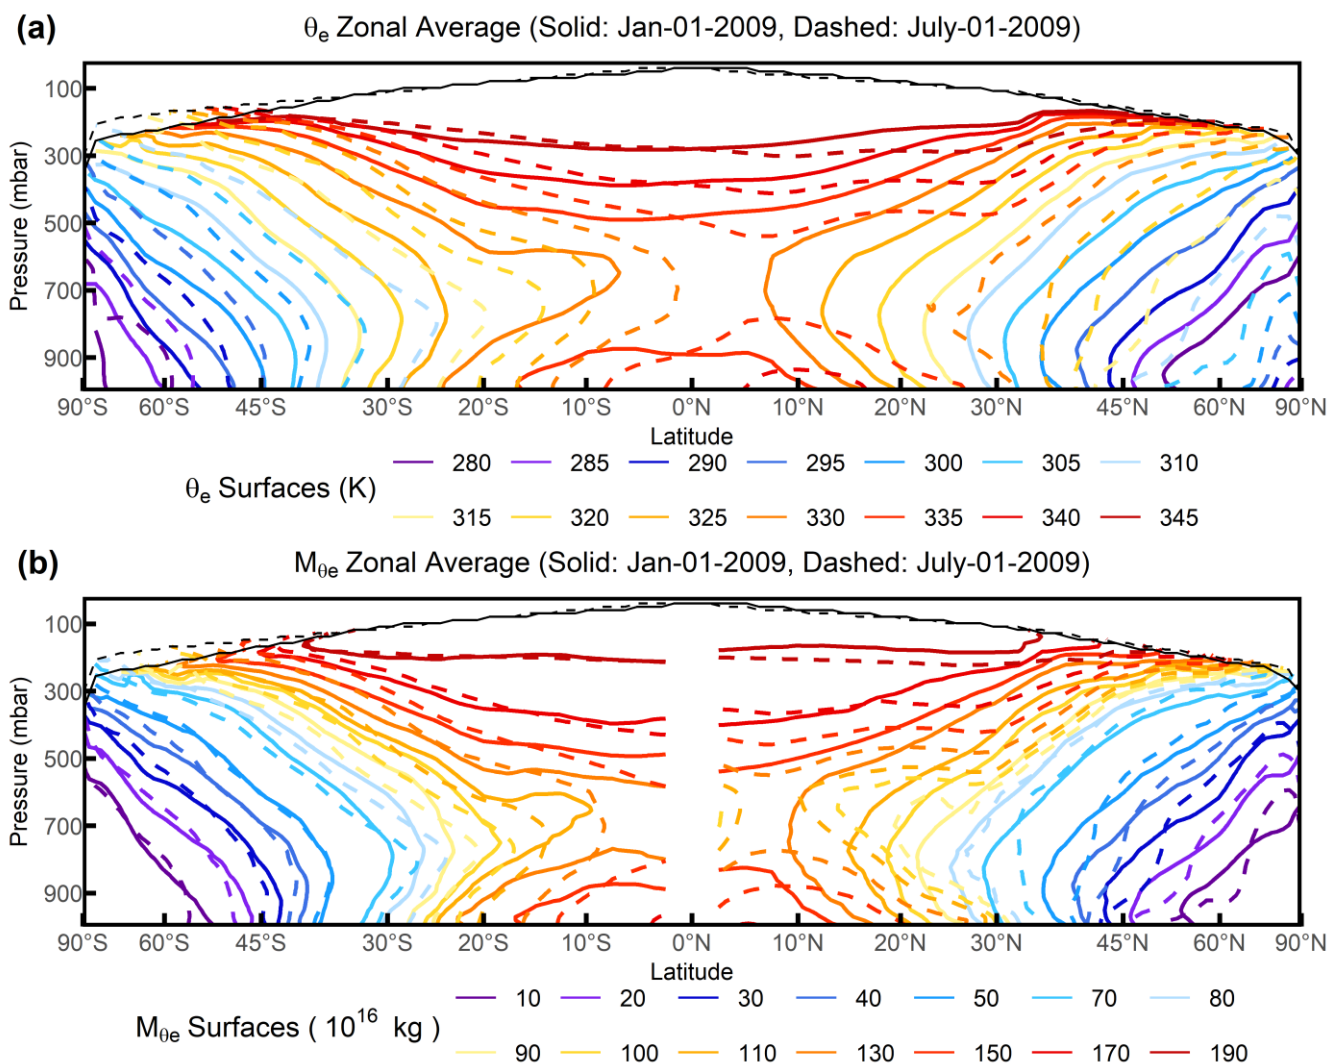

525 **Figure 2: Snapshot of the distribution of (a) zonal average  $\theta_e$  surfaces on 1 January 2009 (solid lines) and 1 July 2009 (dashed lines), (b) zonal average  $M_{\theta_e}$  surfaces on 1 January 2009 (solid lines) and 1 July 2009 (dashed lines). The zonal average tropopause is also shown here for 1 January 2009 (solid black line) and 1 July 2009 (dashed black line).  $\theta_e$ ,  $M_{\theta_e}$  and tropopause are computed from ERA-Interim.**

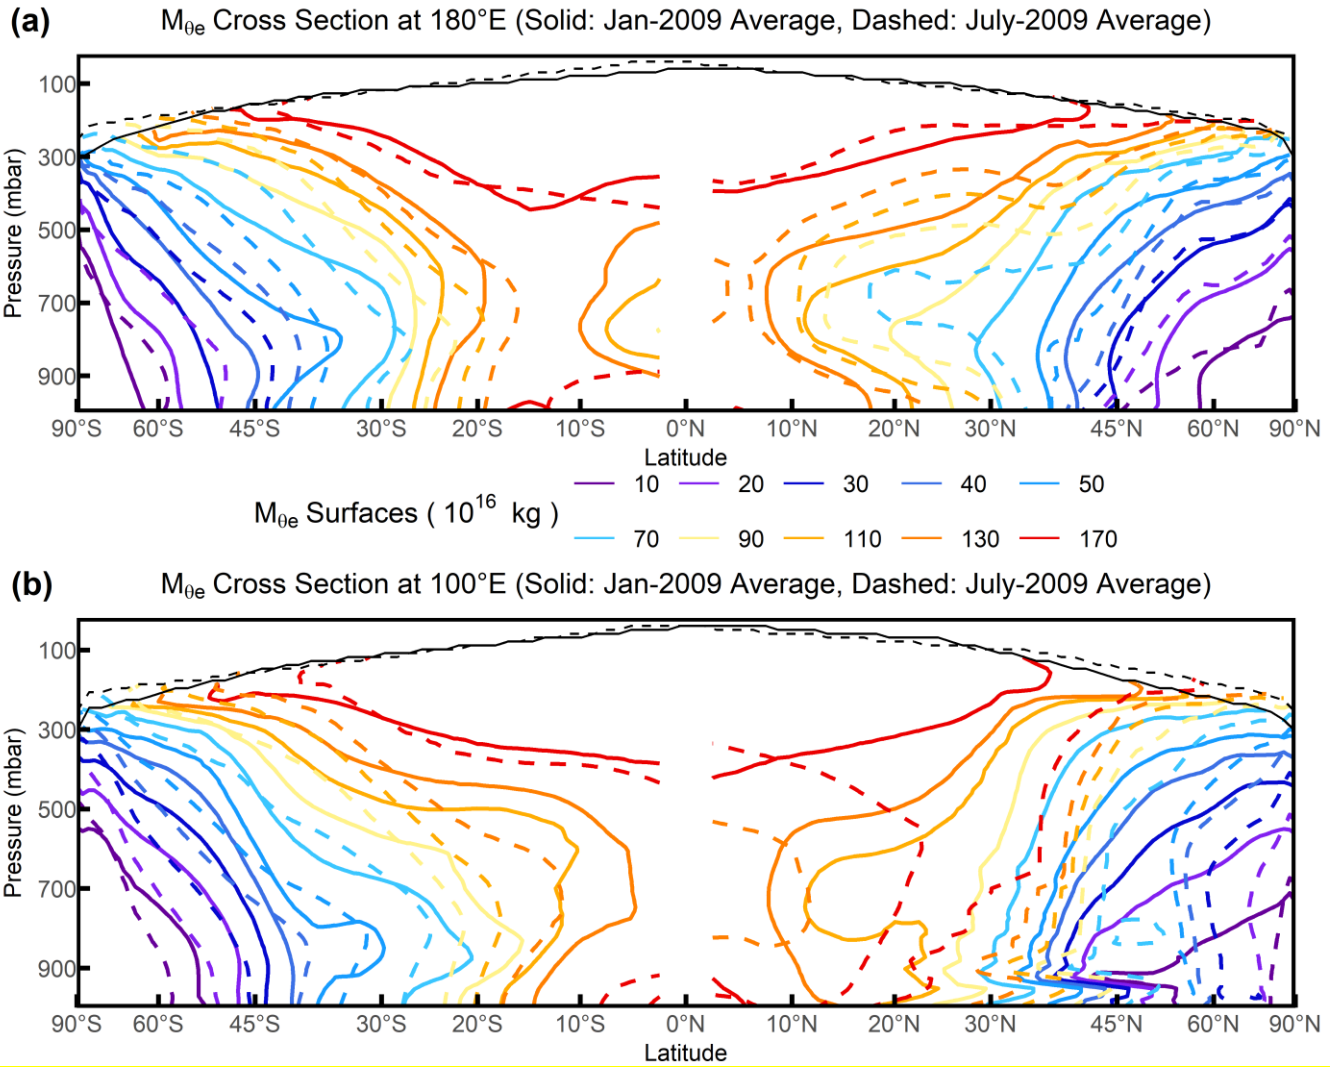

**Figure 3: (a)  $M_{\theta e}$  surfaces at  $180^\circ\text{E}$  as Jan-2009 average (solid lines) and July-2009 average (dashed lines). This cross section is mostly over the Pacific Ocean. (b)  $M_{\theta e}$  surfaces at  $100^\circ\text{E}$  as Jan-2009 average (solid lines) and July-2009 average (dashed lines). This cross section is mostly over the Eurasia land in the Northern Hemisphere.  $M_{\theta e}$  and tropopause are computed from ERA-Interim.**

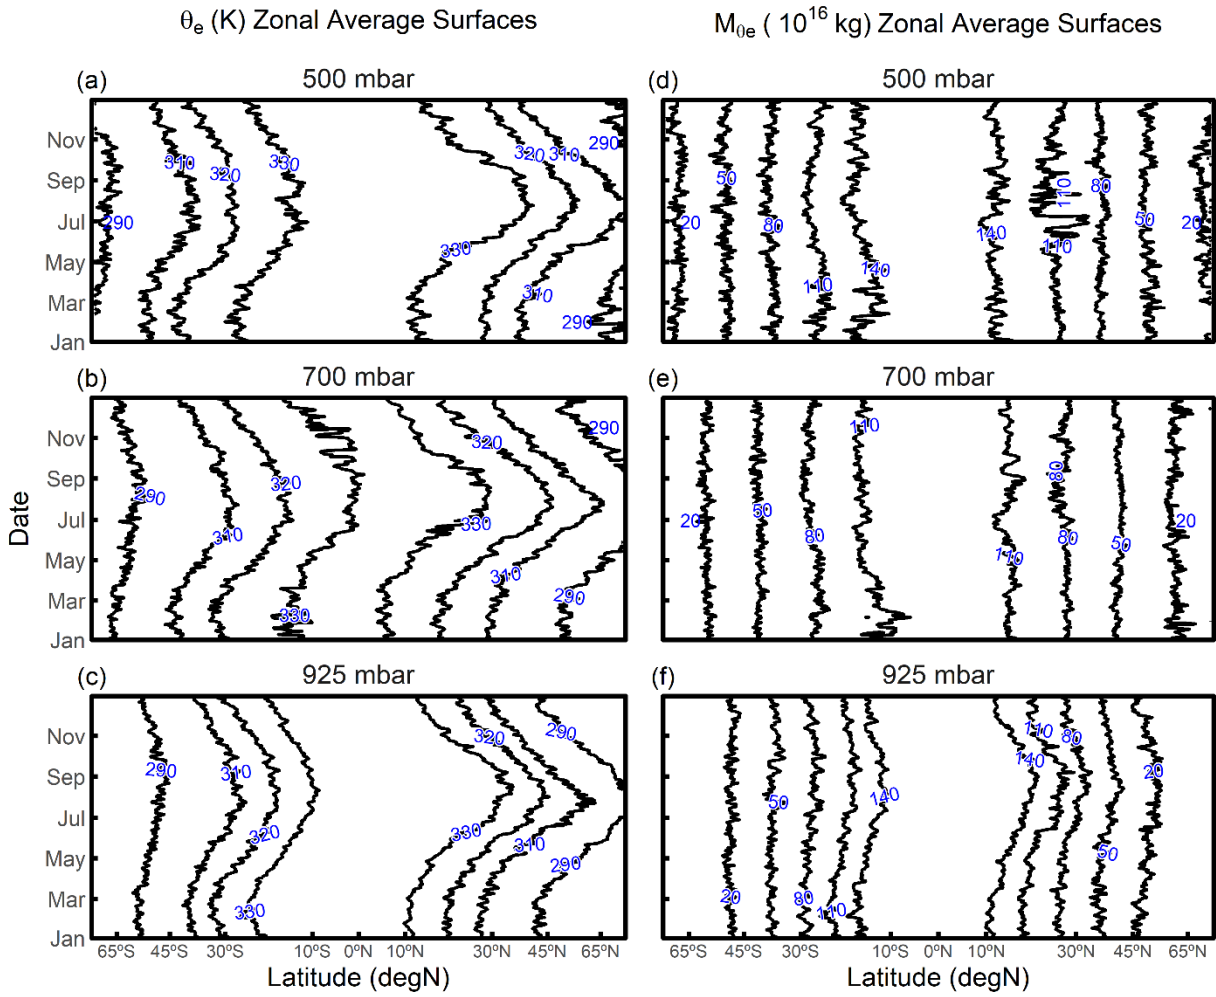

**Figure 4:** Time series of meridional displacement of selected zonal average  $\theta_e$  (K) surfaces over a year at (a) 500 mbar, (b) 700 mbar and (c) 925 mbar. Meridional displacement of selected zonal average  $M_{0e}$  ( $10^{16}$  kg) surfaces over a year at (d) 500 mbar, (e) 700 mbar and (f) 925 mbar. The value of each surface is labelled.  $\theta_e$  and  $M_{0e}$  are computed from ERA-Interim. Results shown are for year 2009.

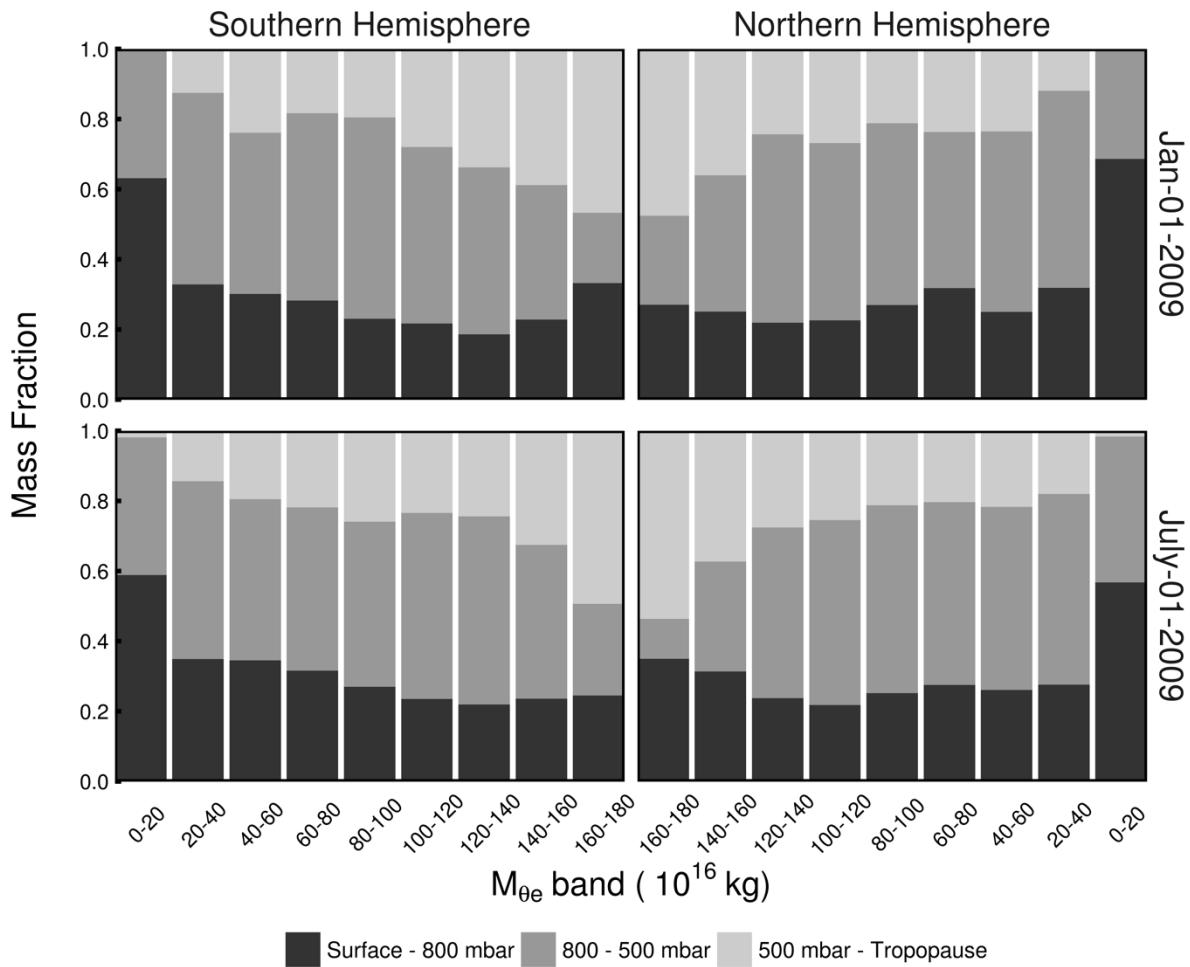

Figure 5: Snapshots (1 January 2009 and 1 July 2009) of the mass distribution of different  $M_{0e}$  bins from three pressure bins (surface to 800 mbar, 800 mbar to 500 mbar, and 500 mbar to tropopause).  $M_{0e}$  is computed from ERA-Interim. Low  $M_{0e}$  bins are seen to have larger contributions from the air near the surface, and high  $M_{0e}$  bins have larger contributions from air aloft. Comparing the top and the bottom panels shows that the seasonal differences in pressure contributions are small except for the highest  $M_{0e}$  bins (160-180) and the lowest  $M_{0e}$  bin in the northern hemisphere (0-20).

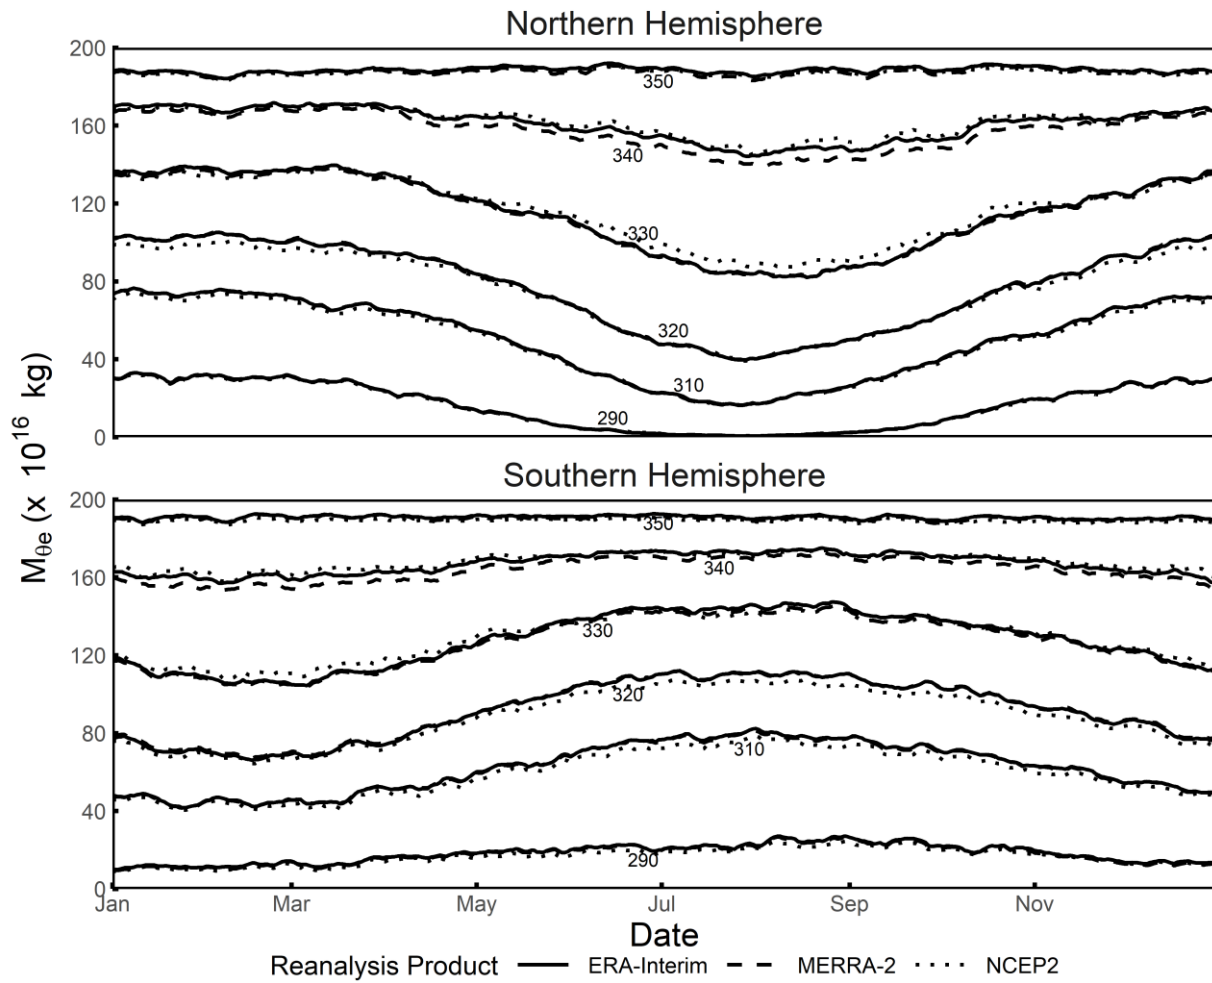

**Figure 6: Variability of  $M_{\theta_e}$  of given  $\theta_e$  surfaces (i.e.,  $\theta_e$ - $M_{\theta_e}$  look-up table) over a year with daily resolution in the Northern and Southern Hemisphere. Data from ERA-Interim is shown as a solid line, MERRA-2 is shown as a dashed line and NCEP2 is shown as a dotted line. Results shown are for year 2009.**

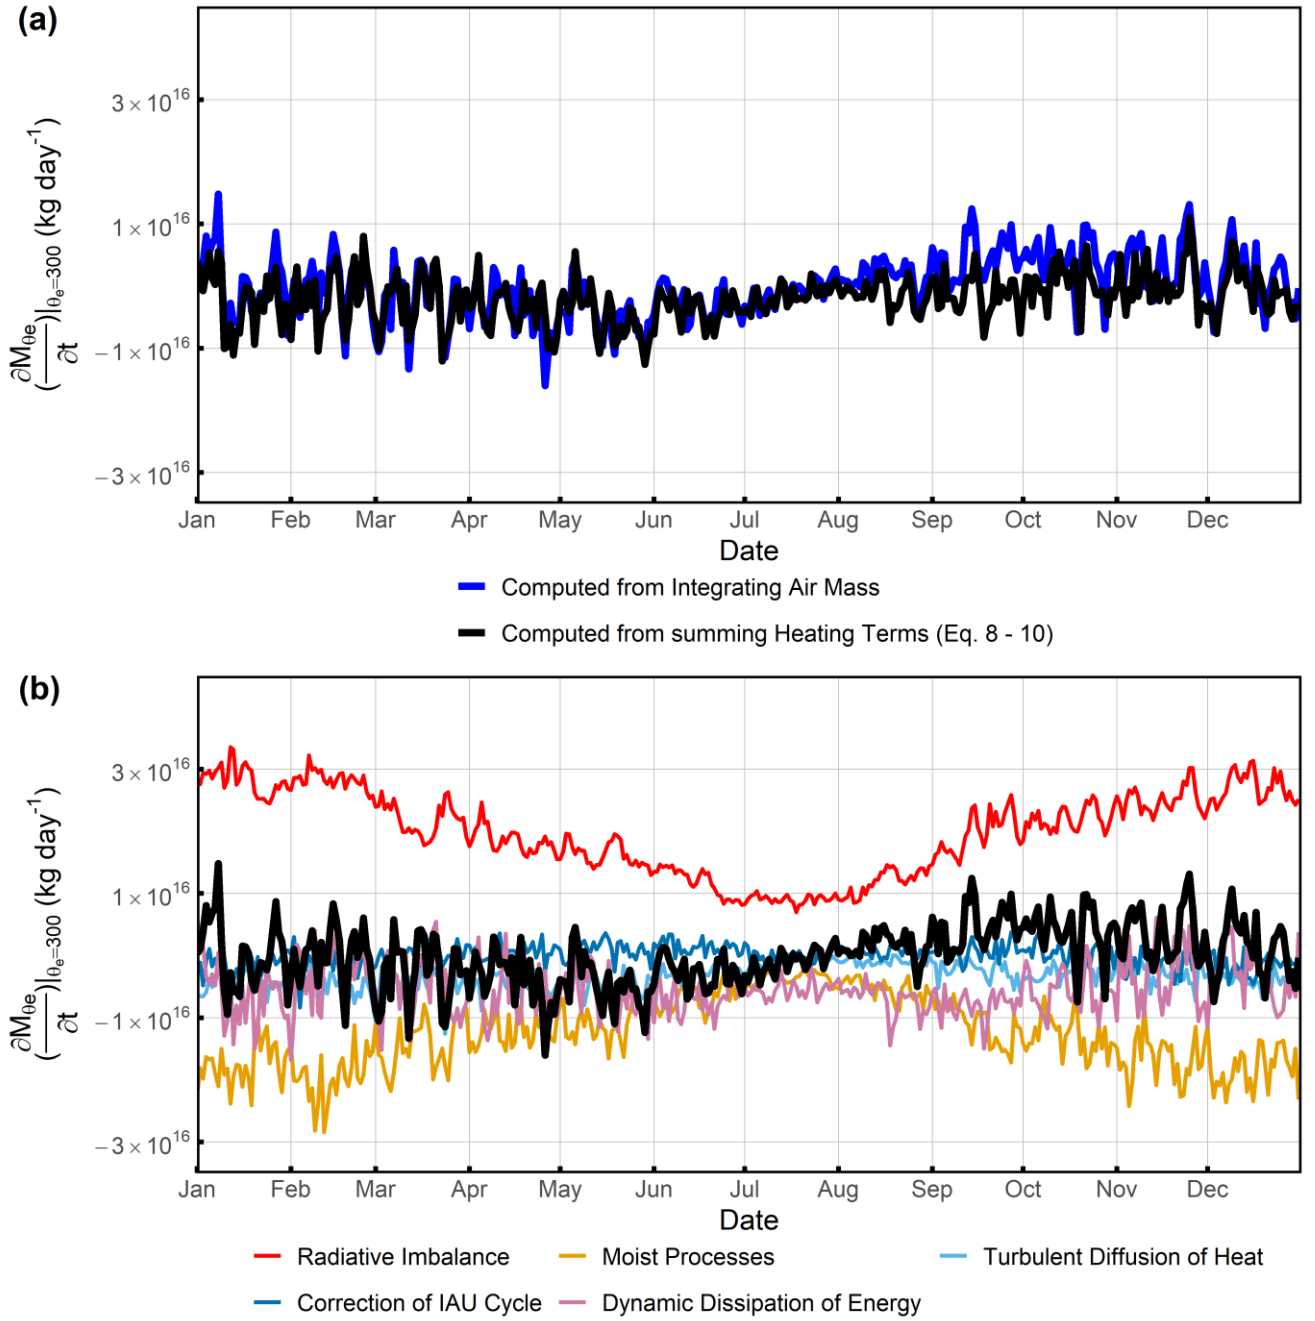

**Figure 7: (a) Temporal variation of  $M_{0e}$  in the Northern Hemisphere at  $\theta_e = 300$  K computed by integrating air mass (blue line) and estimated from the sum of five heating terms (Table 1) in MERRA-2 (black line). (b) The heating variables decomposed into five contributions as indicated (see Table 1). Results shown are for year 2009.**

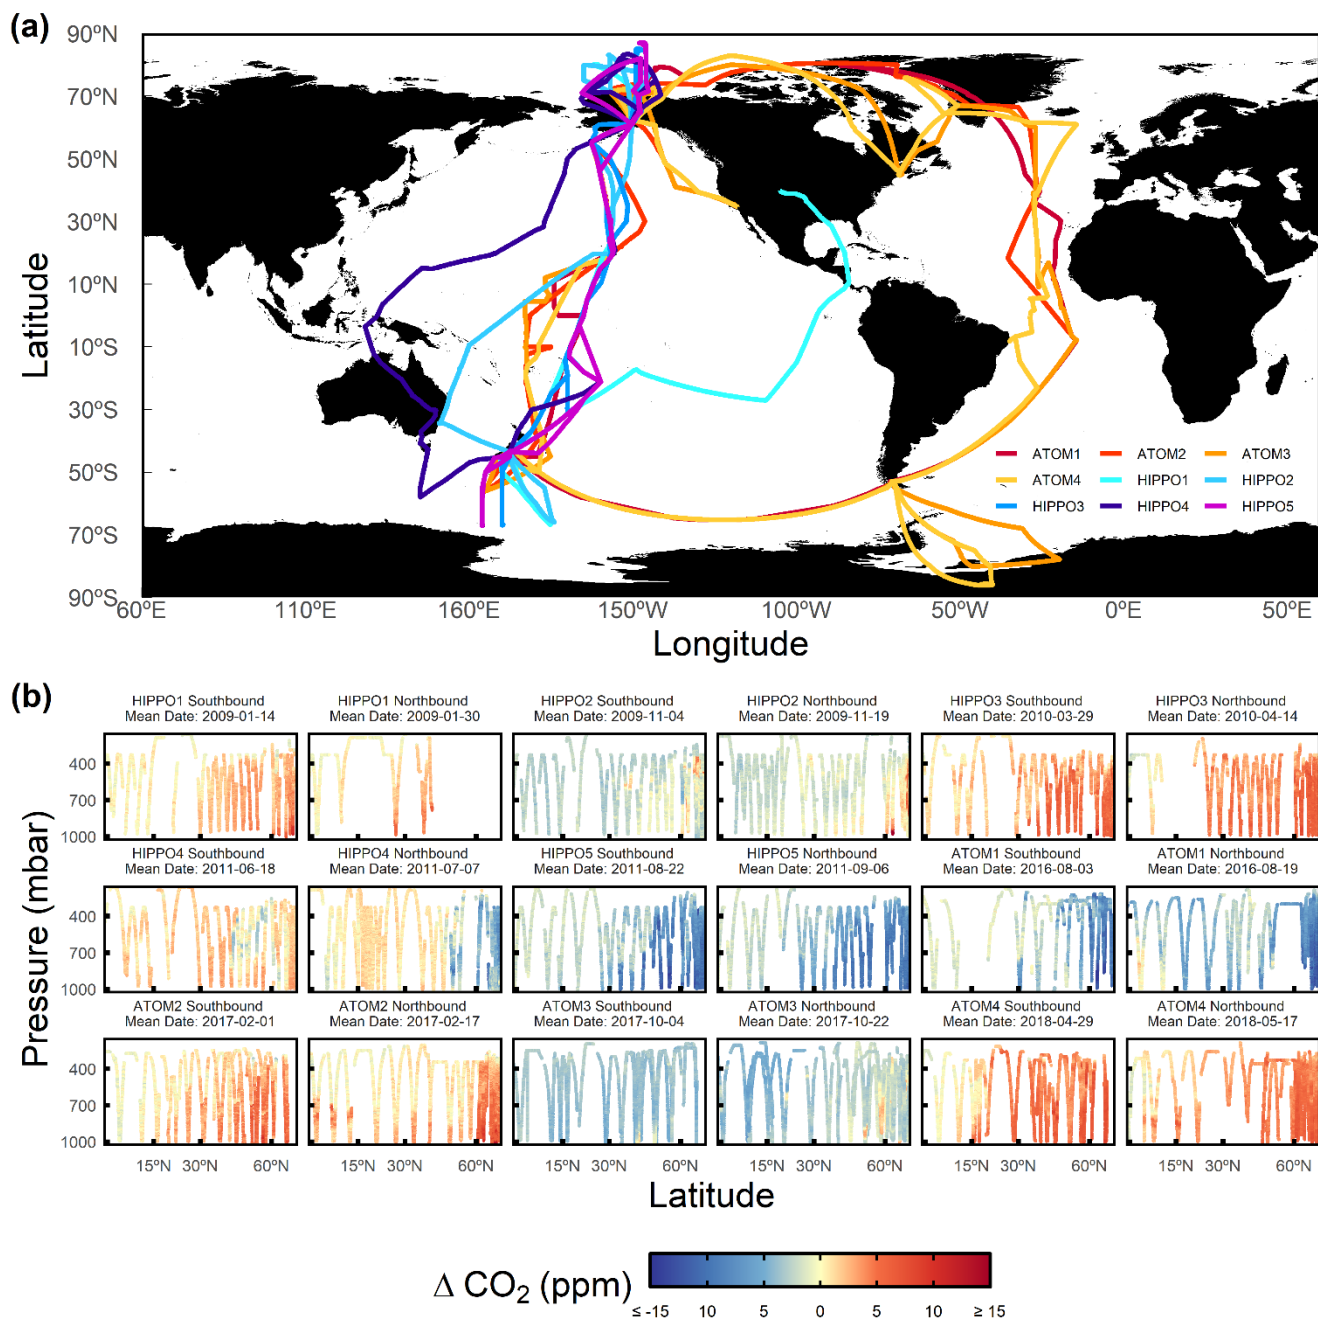

555 **Figure 8: (a) HIPPO and ATom horizontal flight tracks coloured by campaigns. (b) Latitude and pressure cross-section of detrended  $\text{CO}_2$  of each airborne campaign transect.  $\text{CO}_2$  is detrended by subtracting MLO stiff cubic spline trend, which is computed by a stiff cubic spline function plus 4-harmonic functions with linear gain to MLO record.**

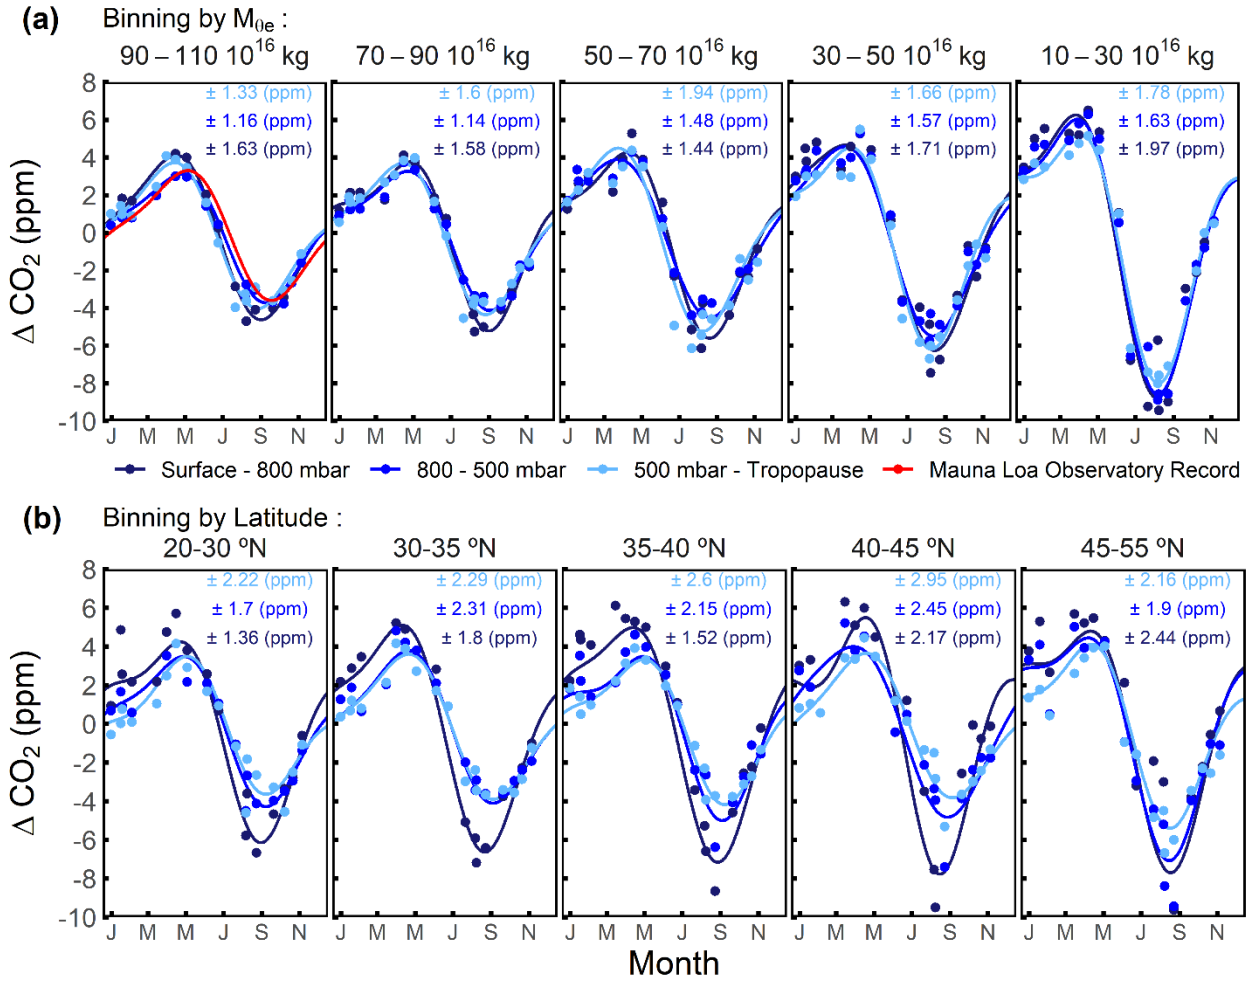

**Figure 9: Seasonal cycles of airborne Northern Hemisphere  $\text{CO}_2$  data sorted by (a)  $M_{0e}$ -pressure bins and (b) latitude-pressure bins.  $M_{0e}$  bins ( $10^{16}$  kg) and latitude bins are shown on the top of each panel. Pressure bins are coloured. The latitude bounds are chosen to approximate the meridional coverage of each corresponding  $M_{0e}$  bin in the lower troposphere. The seasonal cycle at MLO from 2009 to 2018 is shown on the 90–110  $M_{0e}$  bin panel, which spans the  $M_{0e}$  of the station. Airborne observations are first grouped into  $M_{0e}$ -pressure or latitude-pressure bins, and then averaged for each airborne campaign transect, shown as points. We filter out the points averaged from less than 20 10-sec observations. The seasonal cycle of airborne data and MLO (2009–2018) are computed by a 2-harmonic fit to the detrended time series. The  $1\sigma$  variability about the seasonal cycle fits for each  $M_{0e}$ -pressure or latitude-pressure bin are labelled on top of each panel. These  $1\sigma$  values are based on the distribution of all binned observations (not shown), rather than the distribution of average  $\text{CO}_2$  of each bin and airborne campaign transect (shown).**

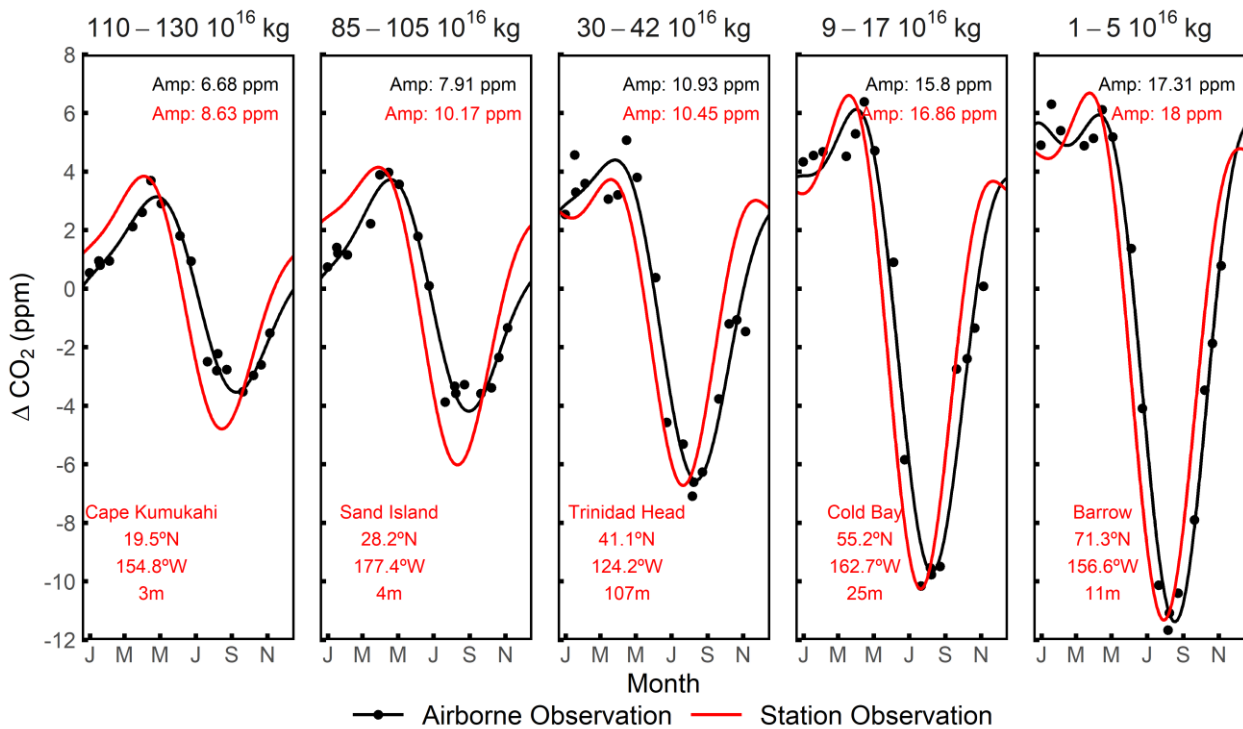

570

**Figure 10: CO<sub>2</sub> seasonal cycles of multiple surface stations (2009-2018) compared to seasonal cycles of airborne observations averaged over corresponding  $M_{0e}$  bin. The choice of  $M_{0e}$  bin is to approximate the range of  $M_{0e}$  at each corresponding surface station and is shown on the top of each panel. Daily  $M_{0e}$  of the station is computed from ERA-Interim, based on its location. We detrend station and airborne observations by subtracting the MLO stiff cubic spline trend. We compute an average detrended CO<sub>2</sub> for each airborne campaign transect and each  $M_{0e}$  bin, shown as black points. The seasonal cycles are computed from a 2-harmonic fit, with the seasonal amplitude (Amp.) shown on the upper right of each panel.**

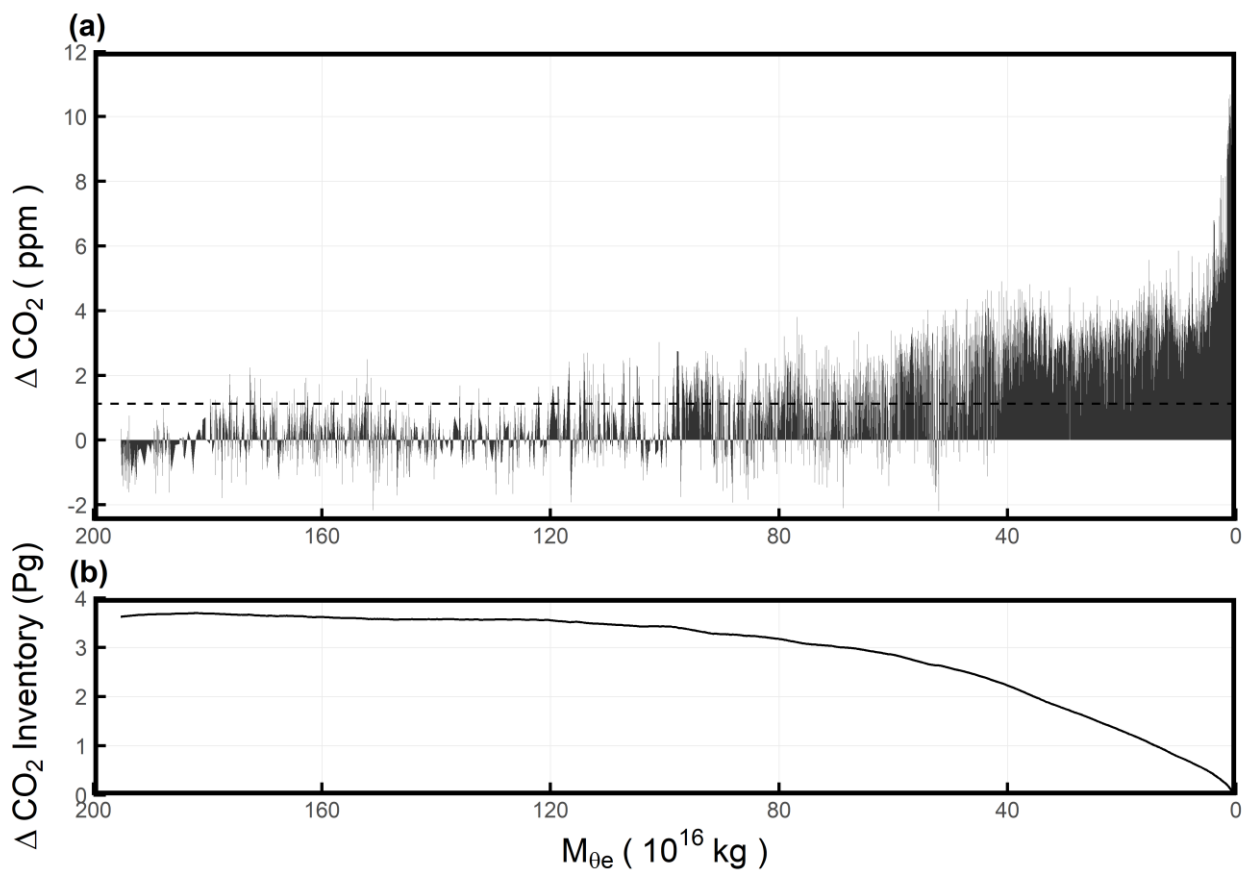

Figure 11: (a) Detrended  $\text{CO}_2$  measurements from HIPPO-1 Southbound (from 12 January 2009 to 17 January 2009) plotted as a function of  $M_{\theta e}$  in the Northern Hemisphere. The data are detrended by subtracting the MLO stiff cubic spline trend. Individual points are connected by straight line segments and the area under the resulting curve is shaded. We note that the area under the curve has units of  $\text{ppm} \times \text{kg}$ , and dividing this by the total dry air mass (i.e., the range of  $M_{\theta e}$  of the integral) gives ppm unit because the mass of dry air is proportional to the moles of dry air. The Northern Hemisphere average of 1.13 ppm is indicated by the dashed line. (b) Integral of the data in (a), rescaled from ppm to Pg, integrating from  $M_{\theta e} = 0$  to a given  $M_{\theta e}$  value.

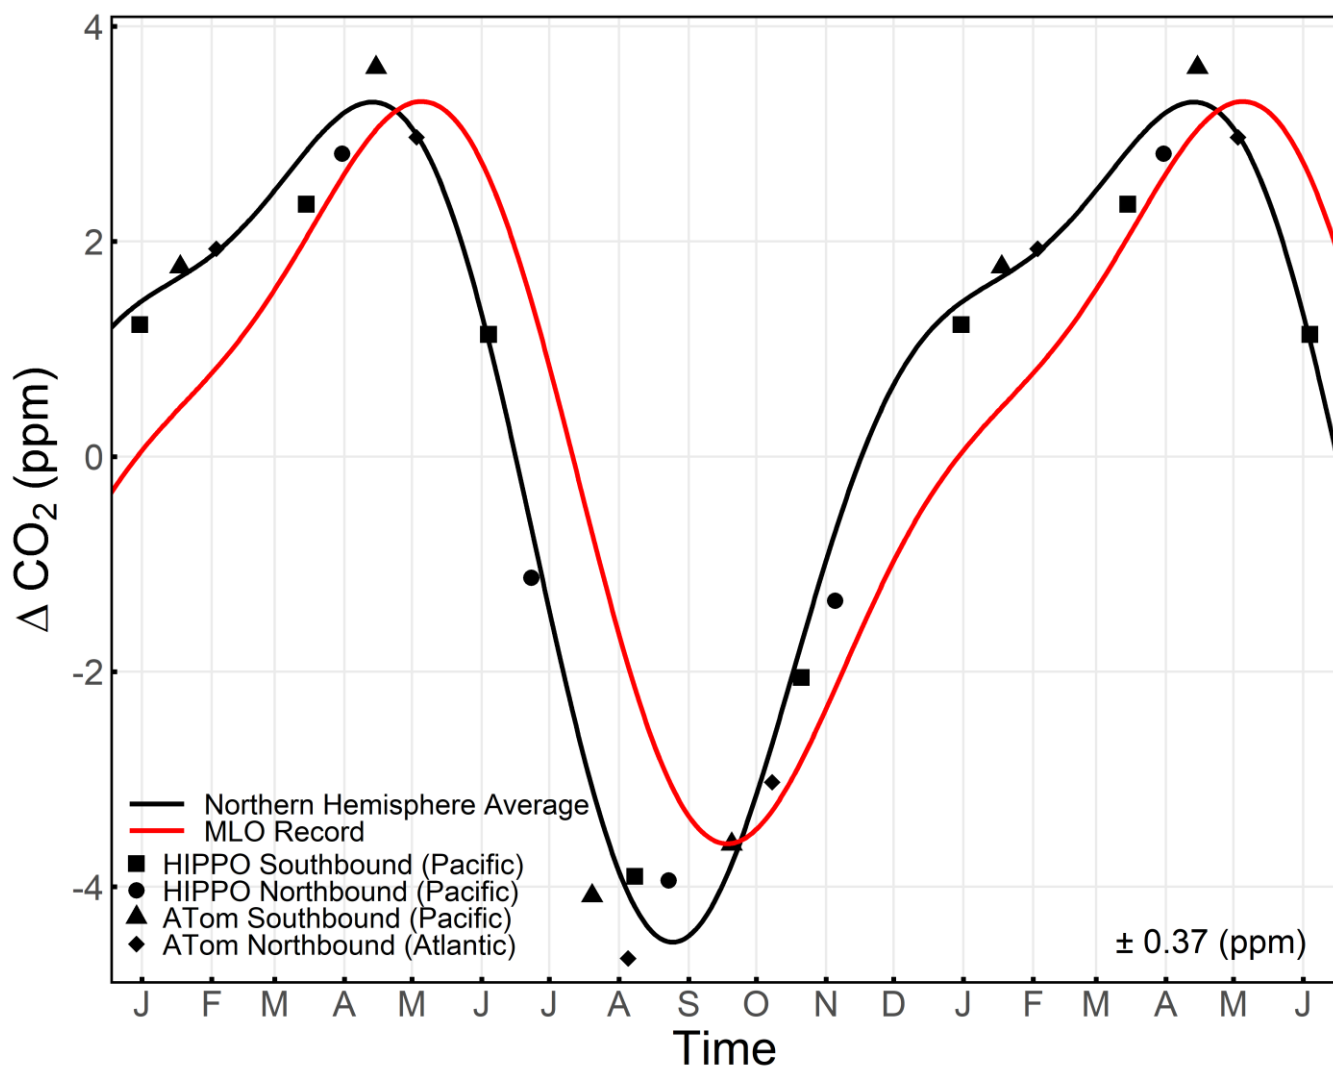

Figure 12: Comparison between the CO<sub>2</sub> seasonal cycle of Northern Hemisphere tropospheric average computed from airborne observation and the M<sub>0c</sub> integration method (black points and line) and the mean cycle at MLO measured by Scripps CO<sub>2</sub> Program from 2009 to 2018 (red line). Both are detrended by subtracting a stiff cubic spline trend at MLO. We then compute a mass-weighted average detrended CO<sub>2</sub> for each airborne campaign transect, shown as black points, with campaigns and transects be presented in different shapes. The seasonal cycle of both are computed by a 2-harmonic fit to the detrended time series. The 1 $\sigma$  variability of the detrended average CO<sub>2</sub> values about the fit line is shown on the lower right. The first half year is repeated for clarity.

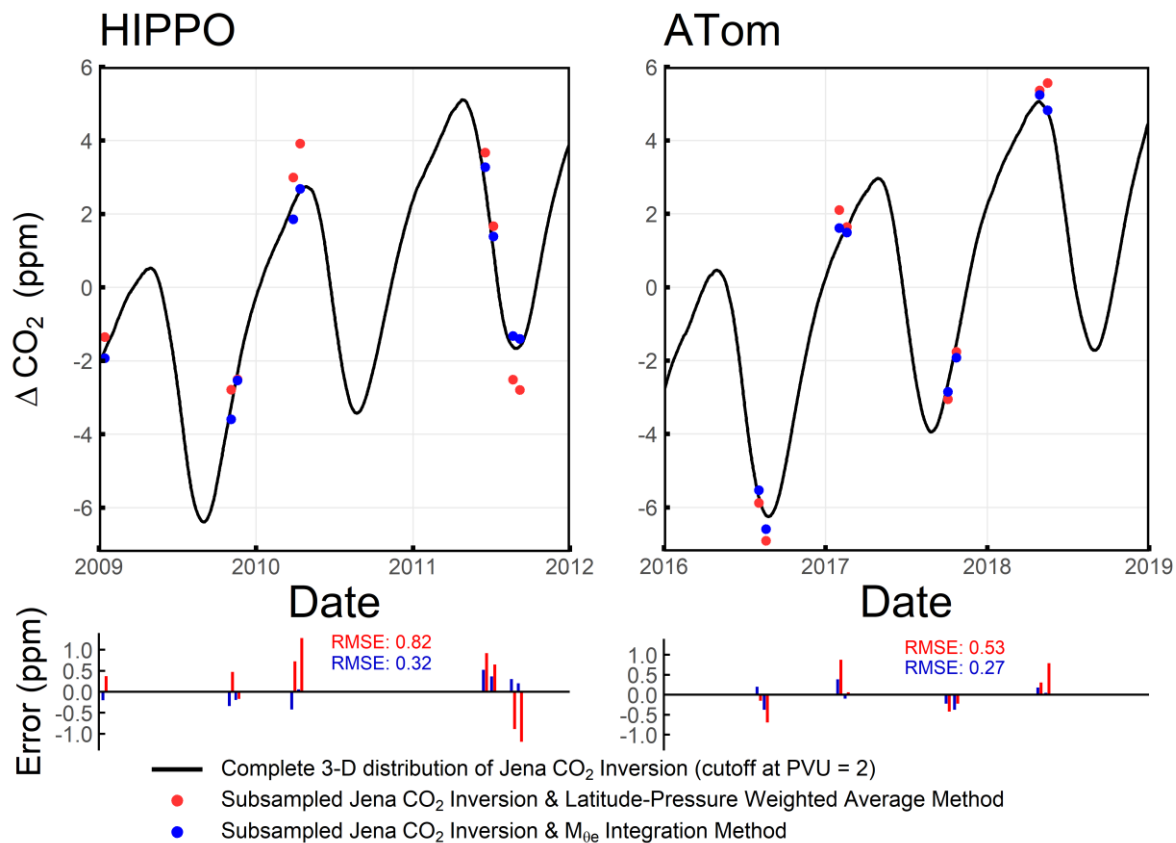

590 **Figure 13: Comparison between the Northern Hemisphere average  $\text{CO}_2$  from full integration of the simulated atmospheric fields from the Jena  $\text{CO}_2$  Inversion (cutoff at  $\text{PVU} = 2$ ) and from two methods that use the same simulated data subsampled with HIPPO/ATom coverage: (1) the  $M_{0e}$  integration method (blue) and (2) simple integration by  $\sin(\text{latitude})$ -pressure (red). We divide the comparison into HIPPO (left) and ATom (right) temporal coverage. The lower panel shows the Error for individual tracks using alternate subsampling methods.**

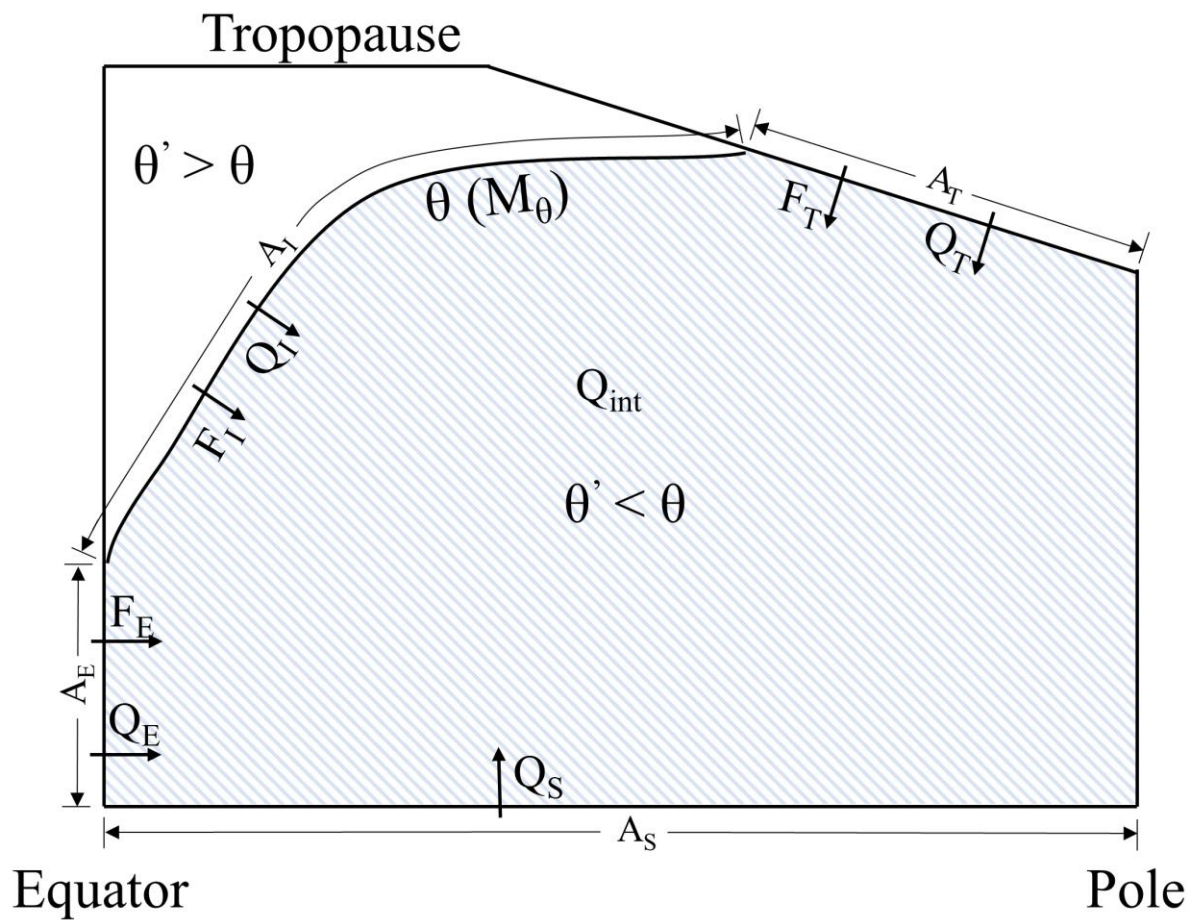

595

**Figure A1:** Illustration of terms defined in Table A1. Shaded area denotes the region  $R(\theta, t)$  with  $\theta'$  lower than  $\theta$ , which is the area of mass integration to yield  $M_\theta$ . The curve denotes a given  $\theta$  or  $M_\theta$  surface.

Table 1: Correspondence of heating variables between our derivation (Eq. 9) and MERRA-2

| Diabatic heating terms in our derivation (Eq. 9) | Diabatic heating terms in MERRA-2, $\frac{\partial Q_i(\theta_e,t)}{\partial \theta_e}$                                                                       |
|--------------------------------------------------|---------------------------------------------------------------------------------------------------------------------------------------------------------------|
| $Q'_{\text{int}}$                                | 1. Radiative heating (i.e., sum of shortwave and longwave radiative heating, $Q_{\text{rad}}$ )<br>+                                                          |
|                                                  | 2. Absorption of kinetic energy that breaking the eddies ( $Q_{\text{dyn}}$ )<br>+                                                                            |
|                                                  | 3. The analysis tendency introduced during the corrector segment of the Incremental Analysis Update (IAU) cycle ( $Q_{\text{ana}}$ )                          |
| $Q_{\text{diff}} + Q_{\text{sen}}$               | 4. Turbulent heat flux including surface sensible heating ( $Q_{\text{trb}}$ )                                                                                |
| $Q_{\text{evap}} + Q_{\text{ice}}$               | 5. Moist processes including all latent heating due to condensation and evaporation as well as the mixing by convective parameterization ( $Q_{\text{mst}}$ ) |
| $Q_{\text{H}_2\text{O}}$                         | Not available                                                                                                                                                 |

605

**Table 2: Fractional contribution of the individual heating terms in Figure 6b to their sum for  $\theta_e = 300\text{K}$ . The analysis is done separately on synoptic and seasonal components. The seasonal component is based on a 2-harmonic fit and the synoptic component is defined as the residual. The fractional contributions sum to 1, while a positive contribution means in phase and negative contribution means anti-phase. A contribution in absolute value that is bigger than 1 illustrates that the variability of the heating term is larger than the variability of the sum on the corresponding time scale.**

| Heating terms    | Seasonal component | Synoptic component |
|------------------|--------------------|--------------------|
| $Q_{\text{rad}}$ | 2.25               | 0.03               |
| $Q_{\text{mst}}$ | -1.39              | 0.07               |
| $Q_{\text{dyn}}$ | 0.24               | 0.72               |
| $Q_{\text{dyn}}$ | 0.21               | 0.11               |
| $Q_{\text{ana}}$ | -0.31              | 0.07               |
| Sum              | 1                  | 1                  |

610 **Table 3: RMSE, seasonal amplitude and day of year of the downward zero-crossing of each simulation based on the Jena CO<sub>2</sub> Inversion. The true value (daily average CO<sub>2</sub>) is computed by integrating over all tropospheric grid cells of the Jena CO<sub>2</sub> Inversion, while troposphere is defined by PVU < 2 from ERA-Interim. Seasonal amplitude and downward zero-crossing of true average and each simulation is computed from 2-harmonic fit to the detrended value, which is detrended by subtracting the MLO cubic stiff spline. Subsample with randomly retaining a certain fraction of data are conducted by randomly subsampling for 1000 times, thus, the seasonal amplitude and day of year of the downward zero-crossing is computed as the mean  $\pm$  standard deviation of the 1000 iterations.**

| Method                                                  | RMSE<br>(ppm)* | Seasonal<br>Amplitude (ppm) | Downward Zero-<br>Crossing (day) |
|---------------------------------------------------------|----------------|-----------------------------|----------------------------------|
| True Value (Cut off at PVU = 2)                         | /              | 7.58                        | 175.1                            |
| Evaluation of M <sub>0e</sub> Integration Method        |                |                             |                                  |
| Full Airborne Coverage                                  | 0.30           | 7.65                        | 181.1                            |
| Subsample: Equator to 30°N                              | 1.26           | 5.74                        | 197.8                            |
| Subsample: Poleward of 30°N                             | 0.82           | 9.47                        | 179.0                            |
| Subsample: Surface – 600 mbar                           | 0.57           | 7.77                        | 185.1                            |
| Subsample: 600 mbar – Tropopause                        | 0.38           | 7.28                        | 180.7                            |
| Subsample: Pacific Only                                 | 0.33           | 7.33                        | 181.6                            |
| Subsample: Randomly retain 10%                          | 0.38           | 7.64 $\pm$ 0.116            | 182.4 $\pm$ 0.82                 |
| Subsample: Randomly retain 5%                           | 0.40           | 7.65 $\pm$ 0.163            | 182.3 $\pm$ 1.08                 |
| Subsample: Randomly retain 1%                           | 0.56           | 7.72 $\pm$ 0.366            | 182.2 $\pm$ 2.24                 |
| Subsample: MEDUSA Coverage                              | 0.48           | 7.52                        | 181.7                            |
| Evaluation of Latitude-Pressure Weighted Average Method |                |                             |                                  |
| Full Airborne Coverage                                  | 0.68           | 9.16                        | 182.2                            |

\* Each simulation yields 17 data points of different date over the seasonal cycle from 17 airborne campaign transects. RMSE of each simulation is computed with respect to the true value.

**Table A1: Definition of variables.**

| Variable                                                      | Definition                                                                                                                    | Unit                            |
|---------------------------------------------------------------|-------------------------------------------------------------------------------------------------------------------------------|---------------------------------|
| $\theta'(r, t)$                                               | Potential temperature at location $r$ and time $t$ .                                                                          | K                               |
| $\theta$                                                      | Potential temperature of the chosen isentropic surface.                                                                       | K                               |
| $R(\theta, t)$                                                | A region in which $\theta'(r, t) < \theta$ shown as shaded area in Figure A1.                                                 |                                 |
| $A_T(\theta, t)$                                              | Area at the tropopause where $\theta'(r, t) < \theta$ .                                                                       | $\text{m}^2$                    |
| $A_E(\theta, t)$                                              | Area at the Equator where $\theta'(r, t) < \theta$ .                                                                          | $\text{m}^2$                    |
| $A_I(\theta, t)$                                              | Area where $\theta'(r, t) = \theta$ .                                                                                         | $\text{m}^2$                    |
| $A_S(\theta, t)$                                              | Area at the Earth surface where $\theta'(r, t) < \theta$ .                                                                    | $\text{m}^2$                    |
| $M_\theta(\theta, t)$                                         | Dry air mass of $R(\theta, t)$ .                                                                                              | kg                              |
| $F_T(\theta, t)$                                              | Mass flux through $A_T(\theta, t)$ . Positive value denotes flux into region $R(\theta, t)$ .                                 | $\text{kg s}^{-1}$              |
| $F_E(\theta, t)$                                              | Mass flux through $A_E(\theta, t)$ . Positive value denotes flux into region $R(\theta, t)$ .                                 | $\text{kg s}^{-1}$              |
| $F_I(\theta, t)$                                              | Mass flux through $A_I(\theta, t)$ . Positive value denotes flux into region $R(\theta, t)$ .                                 | $\text{kg s}^{-1}$              |
| $Q_T(\theta, t)$                                              | Heat flux through $A_T(\theta, t)$ . Positive value denotes flux into region $R(\theta, t)$ .                                 | $\text{J s}^{-1}$               |
| $Q_E(\theta, t)$                                              | Heat flux through $A_E(\theta, t)$ . Positive value denotes flux into region $R(\theta, t)$ .                                 | $\text{J s}^{-1}$               |
| $Q_I(\theta, t)$                                              | Heat flux through $A_I(\theta, t)$ . Positive value denotes flux into region $R(\theta, t)$ .                                 | $\text{J s}^{-1}$               |
| $Q_s(\theta, t)$                                              | Surface sensible heat flux to the region $R(\theta, t)$ . Positive value denotes flux into the atmosphere.                    | $\text{J s}^{-1}$               |
| $Q_{\text{int}}(\theta, t)$                                   | Internal heating and cooling within region $R(\theta, t)$ . Positive value denotes absorbing heat.                            | $\text{J s}^{-1}$               |
| $\frac{\partial Q_s(\theta, t)}{\partial \theta}$             | Surface sensible heat flux to the $\theta$ surface. Positive value denotes flux into the atmosphere (i.e., $\theta$ surface). | $\text{J s}^{-1} \text{K}^{-1}$ |
| $\frac{\partial Q_{\text{int}}(\theta, t)}{\partial \theta}$  | Internal heating and cooling on the $\theta$ surface. Positive value denotes absorbing heat.                                  | $\text{J s}^{-1} \text{K}^{-1}$ |
| $\frac{\partial Q_{\text{diff}}(\theta, t)}{\partial \theta}$ | Turbulent diffusive heat fluxes into the $\theta$ surface. Positive value denotes heat flux into the $\theta$ surface         | $\text{J s}^{-1} \text{K}^{-1}$ |

## References

- 620 Arora, K., Cazenave, A., Engdahl, E. R., Kind, R., Manglik, A., Roy, S., Sain, K. and Uyeda, S.: Encyclopedia of solid earth geophysics, Springer Science & Business Media., 2011.
- Bailey, A., Singh, H. K. A. and Nusbaumer, J.: Evaluating a Moist Isentropic Framework for Poleward Moisture Transport: Implications for Water Isotopes Over Antarctica, *Geophys. Res. Lett.*, 46(13), 7819–7827, doi:10.1029/2019GL082965, 2019.
- Barnes, E. A., Parazoo, N., Orbe, C. and Denning, A. S.: Isentropic transport and the seasonal cycle amplitude of CO<sub>2</sub>, *J.*  
625 *Geophys. Res. Atmos.*, 121(13), 8106–8124, doi:10.1002/2016JD025109, 2016.
- Bent, J. D.: Airborne oxygen measurements over the Southern Ocean as an integrated constraint of seasonal biogeochemical processes, University of California, San Diego., 2014.
- Birner, T., Do, A. and Schumann, U.: How sharp is the tropopause at midlatitudes ?, , 29(14), 1–4, 2002.
- Bolton, D.: The computation of equivalent potential temperature, *Mon. Weather Rev.*, 108(7), 1046–1053, doi:10.1175/1520-  
630 0493(1980)108<1046:TCOEPT>2.0.CO;2, 1980.
- Bozem, H., Hoor, P., Kunkel, D., Köllner, F., Schneider, J., Herber, A., Schulz, H., Leaitch, W. R., Aliabadi, A. A., Willis, M. D. and Burkart, J.: Characterization of transport regimes and the polar dome during Arctic spring and summer using in situ aircraft measurements, *Atmos. Chem. Phys.*, 19, 15049–15071, 2019.
- Butchart, N. and Remsberg, E. E.: The area of the stratospheric polar vortex as a diagnostic for tracer transport on an isentropic  
635 surface, *J. Atmos. Sci.*, 43(13), 1319–1339, 1986.
- Conway, T. J. and Tans, P. P.: Development of the CO<sub>2</sub> latitude gradient in recent decades, *Global Biogeochem. Cycles*, 13(4), 821–826, doi:10.1029/1999GB900045, 1999.
- Dee, D. P., Uppala, S. M., Simmons, A. J., Berrisford, P., Poli, P., Kobayashi, S., Andrae, U., Balmaseda, M. A., Balsamo, G., Bauer, P., Bechtold, P., Beljaars, A. C. M., van de Berg, L., Bidlot, J., Bormann, N., Delsol, C., Dragani, R., Fuentes, M.,  
640 Geer, A. J., Haimberger, L., Healy, S. B., Hersbach, H., Hólm, E. V., Isaksen, L., Kållberg, P., Köhler, M., Matricardi, M., McNally, A. P., Monge-Sanz, B. M., Morcrette, J. J., Park, B. K., Peubey, C., de Rosnay, P., Tavolato, C., Thépaut, J. N. and Vitart, F.: The ERA-Interim reanalysis: Configuration and performance of the data assimilation system, *Q. J. R. Meteorol. Soc.*, 137(656), 553–597, doi:10.1002/qj.828, 2011.
- Dima, I. M. and Wallace, J. M.: On the Seasonality of the Hadley Cell, *J. Atmos. Sci.*, 60(12), 1522–1527,  
645 doi:https://doi.org/10.1175/1520-0469(2003)060<1522:OTSOTH>2.0.CO;2, 2003.
- Dlugokencky, E. J., Mund, J. W., Crotwell, A. M., Crotwell, M. J. and Thoning, K. W.: Atmospheric Carbon Dioxide Dry Air Mole Fractions from the NOAA ESRL Carbon Cycle Cooperative Global Air Sampling Network, 1968-2018, Version: 2019-07, <https://doi.org/10.15138/wkgj-f215>., 2019.

- Ehhalt, D. H.: The CH<sub>4</sub> concentration over the ocean and its possible variation with latitude, *Tellus*, 30(2), 169–176, doi:10.3402/tellusa.v30i2.10329, 1978.
- 650 Fasullo, J. T. and Trenberth, K. E.: The annual cycle of the energy budget. Part I: Global mean and land-ocean exchanges, *J. Clim.*, 21(10), 2297–2312, doi:10.1175/2007JCLI1935.1, 2008.
- Foltz, G. R. and McPhaden, M. J.: The role of oceanic heat advection in the evolution of tropical North and South Atlantic SST anomalies, *J. Clim.*, 19(23), 6122–6138, doi:10.1175/JCLI3961.1, 2006.
- 655 Gelaro, R., McCarty, W., Suárez, M. J., Todling, R., Molod, A., Takacs, L., Randles, C. A., Darmenov, A., Bosilovich, M. G., Reichle, R., Wargan, K., Coy, L., Cullather, R., Draper, C., Akella, S., Buchard, V., Conaty, A., da Silva, A. M., Gu, W., Kim, G. K., Koster, R., Lucchesi, R., Merkova, D., Nielsen, J. E., Partyka, G., Pawson, S., Putman, W., Rienecker, M., Schubert, S. D., Sienkiewicz, M. and Zhao, B.: The modern-era retrospective analysis for research and applications, version 2 (MERRA-2), *J. Clim.*, 30(14), 5419–5454, doi:10.1175/JCLI-D-16-0758.1, 2017.
- 660 Graven, H. D., Keeling, R. F., Piper, S. C., Patra, P. K., Stephens, B. B., Wofsy, S. C., Welp, L. R., Sweeney, C., Tans, P. P., Kelley, J. J., Daube, B. C., Kort, E. A., Santoni, G. W. and Bent, J. D.: Enhanced seasonal exchange of CO<sub>2</sub> by Northern ecosystems since 1960, *Science*, 341(6150), 1085–1089, doi:10.1126/science.1239207, 2013.
- Harris, J. M. and Kahl, J. D.: A descriptive atmospheric transport climatology for the Mauna Loa Observatory, using clustered trajectories, *J. Geophys. Res. Atmos.*, 95(D9), 13651–13667, doi:10.1029/jd095id09p13651, 1990.
- 665 Harris, J. M., Tans, P. P., Dlugokencky, E. J., Masarie, K. A. and Lang, Patricia M anWhittlestone, Stewart and Steele, L. P.: Variations in atmospheric methane at Mauna Loa Observatory related to long-range transport, *J. Geophys. Res. Atmos.*, 97(D5), 6003–6010, doi:10.1029/92JD00158, 1992.
- Hurst, D.: Global Monitoring Division (GMD), Earth System Research Laboratory, NOAA. 2011. UCATS 2-Channel Gas Chromatograph (GC). Version 1.0. UCAR/NCAR - Earth Observing Laboratory. <https://data.eol.ucar.edu/dataset/112.021>.
- 670 Jacob, D. J.: Introduction to atmospheric chemistry, Princeton University Press., 1999.
- Kanamitsu, M., Ebisuzaki, W., Woollen, J., Yang, S.-K., Hnilo, J. J., Fiorino, M. and Potter, G. L.: NCEP-DOE AMIP-II Reanalysis (R-2), *Bull. Am. Meteorol. Soc.*, 83(11), 1631–1643, doi:10.1175/BAMS-83-11, 2002.
- Keppel-Aleks, G., Wennberg, P. O. and Schneider, T.: Sources of variations in total column carbon dioxide, *Atmos. Chem. Phys.*, 11(8), 3581–3593, doi:10.5194/acp-11-3581-2011, 2011.
- 675 Li, Z. and Leighton, H. G.: Global climatologies of solar radiation budgets at the surface and in the atmosphere from 5 years of ERBE data, *J. Geophys. Res. Atmos.*, 98(D3), 4919–4930, doi:10.1029/93jd00003, 1993.
- Linz, M., Plumb, R. A., GerBer, E. P. and Sheshadri, A.: The Relationship between Age of Air and the Diabatic Circulation

- of the Stratosphere, *J. Atmos. Sci.*, 73(11), 4507–4518, doi:10.1175/JAS-D-16-0125.1, 2016.
- Miyazaki, K. and Iwasaki, T.: Diagnosis of Meridional Ozone Transport Based on Mass-Weighted Isentropic Zonal Means, *J. Atmos. Sci.*, 62(4), 1192–1208, 2005.
- Miyazaki, K., Patra, P. K., Takigawa, M., Iwasaki, T. and Nakazawa, T.: Global-scale transport of carbon dioxide in the troposphere, *J. Geophys. Res. Atmos.*, 113(D15), D15301, doi:10.1029/2007JD009557, 2008.
- Mooney, P. A., Mulligan, F. J. and Fealy, R.: Comparison of ERA-40, ERA-Interim and NCEP/NCAR reanalysis data with observed surface air temperatures over Ireland, *Int. J. Climatol.*, 31(4), 545–557, doi:10.1002/joc.2098, 2011.
- Parazoo, N. C., Denning, A. S., Kawa, S. R., Corbin, K. D., Lokupitiya, R. S. and Baker, I. T.: Mechanisms for synoptic variations of atmospheric CO<sub>2</sub> in North America, South America and Europe, *Atmos. Chem. Phys.*, 8, 7239–7254, doi:https://doi.org/10.5194/acp-8-7239-2008, 2008.
- Parazoo, N. C., Denning, A. S., Berry, J. A., Wolf, A., Randall, D. A., Kawa, S. R., Pauluis, O. and Doney, S. C.: Moist synoptic transport of CO<sub>2</sub> along the mid-latitude storm track, *Geophys. Res. Lett.*, 38(9), doi:10.1029/2011GL047238, 2011.
- Parazoo, N. C., Denning, A. S., Kawa, S. R., Pawson, S. and Lokupitiya, R.: CO<sub>2</sub> flux estimation errors associated with moist atmospheric processes, *Atmos. Chem. Phys.*, 12(14), 6405–6416, doi:10.5194/acp-12-6405-2012, 2012.
- Pauluis, O., Czaja, A. and Korty, R.: The global atmospheric circulation on moist isentropes, *Science*, 321(5892), 1075–1078, doi:10.1126/science.1159649, 2008.
- Pauluis, O., Czaja, A. and Korty, R.: The global atmospheric circulation in moist isentropic coordinates, *J. Clim.*, 23(11), 3077–3093, doi:10.1175/2009JCLI2789.1, 2010.
- Prather, M. J., Flynn, C. M., Fiore, A., Correa, G., Strode, S. A., Steenrod, S. D., Murray, L. T. and Lamarque, J. F.: ATom: Simulated Data Stream for Modeling ATom-like Measurements, ORNL Distributed Active Archive Center., 2018.
- Randerson, T., Thompson, V., Conway, J., Fung, I. Y. and Field, B.: The contribution of terrestrial sources and sinks to trends in the seasonal cycle of atmospheric carbon dioxide, *Global Biogeochem. Cycles*, 11(4), 535–560, doi:https://doi.org/10.1029/97GB02268, 1997.
- Rasmussen, R. A. and Khalil, R. A. K.: Atmospheric Methane (CH<sub>4</sub>): Trends and Seasonal Cycles, *J. Geophys. Res.*, 86(C10), 9826–9832, doi:https://doi.org/10.1029/JC086iC10p09826, 1981.
- Rödenbeck, C., Houweling, S., Gloor, M. and Heimann, M.: CO<sub>2</sub> flux history 1982–2001 inferred from atmospheric data using a global inversion of atmospheric transport, *Atmos. Chem. Phys.*, 3, 1919–1964, doi:https://doi.org/10.5194/acp-3-1919-2003https://doi.org/10.5194/acp-3-1919-2003, 2003.
- Santoni, G. W., Daube, B. C., Kort, E. A., Jiménez, R., Park, S., Pittman, J. V., Gottlieb, E., Xiang, B., Zahniser, M. S., Nelson,

- D. D., Mcmanus, J. B., Peischl, J., Ryerson, T. B., Holloway, S., Andrews, A. E., Sweeney, C., Hall, B., Hintsa, E. J., Moore, F. L., Elkins, J. W., Hurst, D. F., Stephens, B. B., Bent, J. and Wofsy, S. C.: Evaluation of the airborne quantum cascade laser spectrometer (QCLS) measurements of the carbon and greenhouse gas suite - CO<sub>2</sub>, CH<sub>4</sub>, N<sub>2</sub>O, and CO - during the CalNex and HIPPO Campaigns, *Atmos. Meas. Tech.*, 7(6), 1509–1526, doi:10.5194/amt-7-1509-2014, 2014.
- Stephens, B. B., Morgan, E. J., Bent, J. D., Keeling, R. F., Watt, A. S., Shertz, S. R. and Daube, B. C.: Airborne measurements of oxygen concentration from the surface to the lower stratosphere and pole to pole, *Atmospheric Meas. Tech. Discuss.*, doi:https://doi.org/10.5194/amt-2020-294, 2020.
- Stull, R. B.: An introduction to boundary layer meteorology, Springer Science & Business Media., 2012.
- Sweeney, C., Karion, A., Wolter, S., Newberger, T., Guenther, D., Higgs, J. A., Andrews, A. E., Lang, P. M., Neff, D., Dlugokencky, E., Miller, J. B., Montzka, S. A., Miller, B. R., Masarie, K. A., Biraud, S. C., Novelli, P. C., Crotwell, M., Crotwell, A. M., Thoning, K. and Tans, P. P.: Seasonal climatology of CO<sub>2</sub> across North America from aircraft measurements in the NOAA/ESRL Global Greenhouse Gas Reference Network, *J. Geophys. Res. Atmos.*, 120(10), 5155–5190, doi:https://doi.org/10.1002/2014JD022591, 2015.
- Tohjima, Y., Minejima, C., Mukai, H., MacHida, T., Yamagishi, H. and Nojiri, Y.: Analysis of seasonality and annual mean distribution of atmospheric potential oxygen (APO) in the Pacific region, *Global Biogeochem. Cycles*, 26(4), 1–15, doi:10.1029/2011GB004110, 2012.
- Tung, K. K.: On the Two-Dimensional Transport of Stratospheric Tracer Gases in Isentropic Coordinates, *J. Atmos. Sci.*, 39(10), 2330–2355, doi:https://doi.org/10.1175/1520-0469(1982)039<2330:OTDITO>2.0.CO;2, 1982.
- Walín, G.: On the relation between sea-surface heat flow and thermal circulation in the ocean, *Tellus*, 34(2), 187–195, doi:10.3402/tellusa.v34i2.10801, 1982.
- Wang, J. W., Denning, A. S., Lu, L., Baker, I. T., Corbin, K. D. and Davis, K. J.: Observations and simulations of synoptic, regional, and local variations in atmospheric CO<sub>2</sub>, *J. Geophys. Res. Atmos.*, 112(D4), D04108, doi:10.1029/2006JD007410, 2007.
- Wexler, A.: Vapor pressure equation for water in the range 0 to 100 C, *J. Res. Natl. Bur. Stand. Sect. A Phys. Chem.*, 75A(3), 213, doi:10.6028/jres.075a.022, 1976.
- Wofsy, S.: HIPPO MEDUSA Flask Sample Trace Gas And Isotope Data. Version 1.0. UCAR/NCAR - Earth Observing Laboratory. [https://doi.org/10.3334/CDIAC/HIPPO\\_014](https://doi.org/10.3334/CDIAC/HIPPO_014), 2017a.
- Wofsy, S. C.: HIAPER Pole-to-Pole Observations (HIPPO): fine-grained, global-scale measurements of climatically important atmospheric gases and aerosols, *Philos. Trans. R. Soc. A Math. Phys. Eng. Sci.*, 369(1943), 2073–2086, doi:10.1098/rsta.2010.0313, 2011.

Wofsy, S. C.: HIPPO Merged 10-Second Meteorology, Atmospheric Chemistry, and Aerosol Data. Version 1.0. UCAR/NCAR - Earth Observing Laboratory. [https://doi.org/10.3334/CDIAC/HIPPO\\_010](https://doi.org/10.3334/CDIAC/HIPPO_010), 2017b.

Wofsy, S. C., Afshar, S., Allen, H., APEL, E., Asher, E., Barletta, B., Bent, J., Bian, H., Biggs, B., Blake, D. and Others:  
740 ATom: Merged Atmospheric Chemistry, Trace Gases, and Aerosols, ORNL DAAC, doi:10.3334/ORNLDAAAC/1581, 2018.

Yang, H., Chen, G., Tang, Q. and Hess, P.: Quantifying isentropic stratosphere-troposphere exchange of ozone, *J. Geophys. Res. Atmos.*, 121(7), 3372–3387, doi:<https://doi.org/10.1002/2015JD024180>, 2016.

Supplement of

**A mass-weighted atmospheric isentropic coordinate for mapping chemical tracers and computing atmospheric inventories**

5 Yuming Jin et al.

*Correspondence to:* Yuming Jin ([y2jin@ucsd.edu](mailto:y2jin@ucsd.edu))

10 **S1: Contribution of each heating term to the overall time variation of  $M_{\theta_e}$**

The fractional contributions from different heating terms to the temporal variation of  $M_{\theta_e}$  on seasonal and synoptic scales are computed by using a vector projection method (Graven et al., 2013). In this method, each heating term ( $\frac{\partial}{\partial t} M_{\theta_e}^i(\theta_e, t)$ ) is projected onto the sum of all the heating terms ( $\frac{\partial}{\partial t} M_{\theta_e}(\theta_e, t)$ ) via:

$$x_i = \frac{\sum_t \left[ \frac{\partial}{\partial t} M_{\theta_e}^i(\theta_e, t) \cdot \frac{\partial}{\partial t} M_{\theta_e}(\theta_e, t) \right]}{\sum_t \left[ \frac{\partial}{\partial t} M_{\theta_e}(\theta_e, t) \cdot \frac{\partial}{\partial t} M_{\theta_e}(\theta_e, t) \right]} \quad (S1)$$

15 with

$$\frac{\partial}{\partial t} M_{\theta_e}(\theta_e, t) = \sum_i \frac{\partial}{\partial t} M_{\theta_e}^i(\theta_e, t) \quad (S2)$$

where the sum is over all time steps, and the mean of each  $\frac{\partial}{\partial t} M_{\theta_e}^i(\theta_e, t)$  has been pre-subtracted (i.e.,  $\sum_t \frac{\partial}{\partial t} M_{\theta_e}^i(\theta_e, t) = 0$ ). The sum over  $x_i$  equals 1, but individual  $x_i$  can be either positive or negative and the absolute value can be either larger or smaller than 1.

20

(a)

Year: 2010

$\theta_e$  surface: 300 (K)

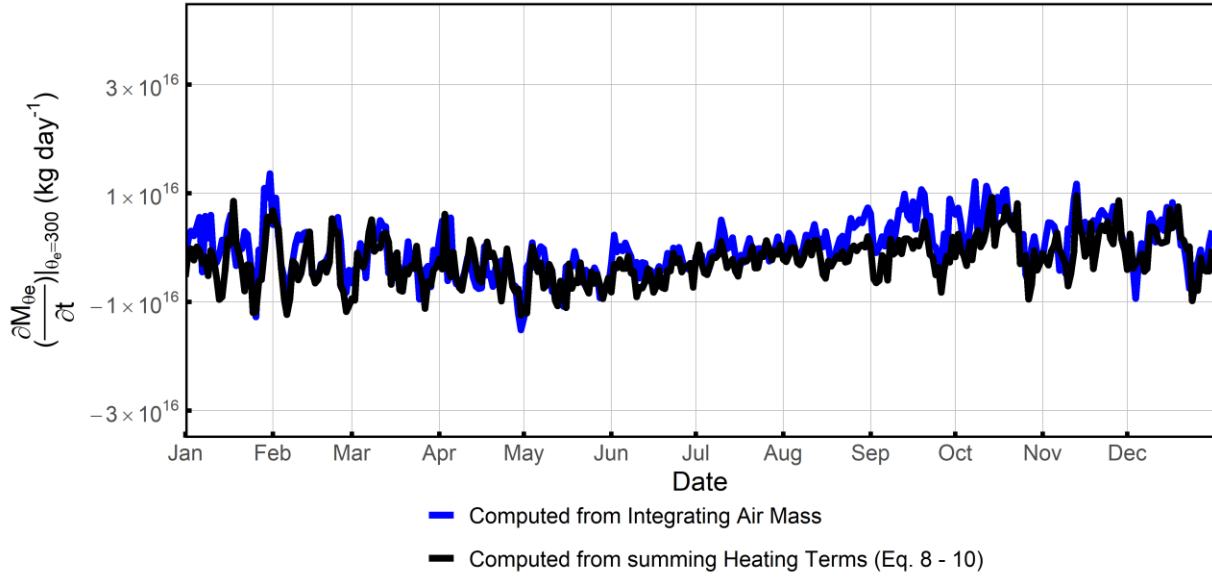

(b)

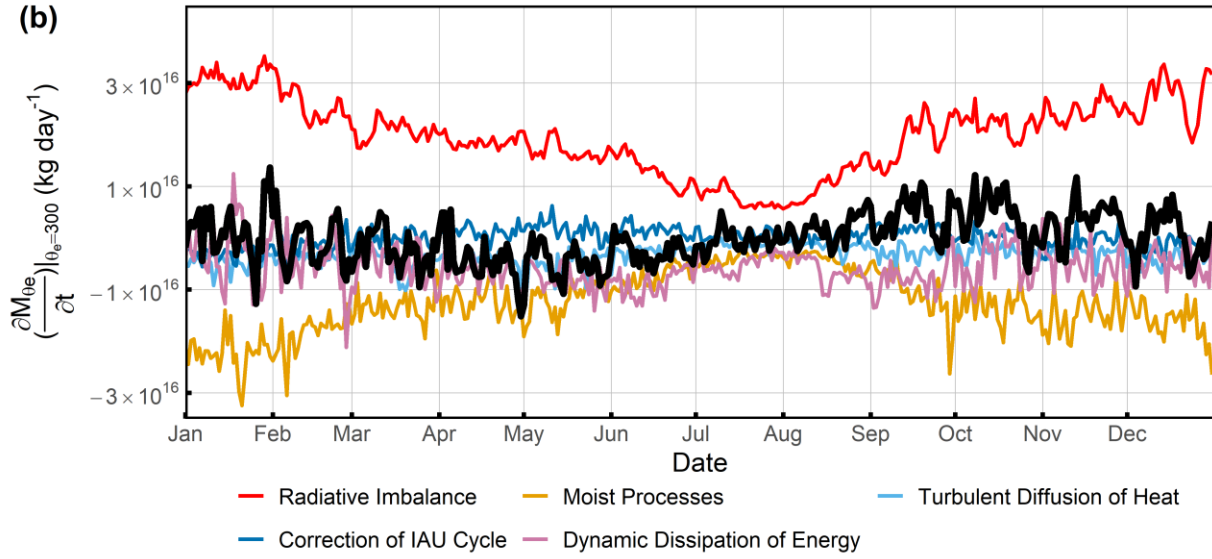

Figure S1: (a) Temporal variation of  $M_{\theta_e}$  in the Northern Hemisphere at  $\theta_e = 300$  K computed by integrating air mass (blue line) and estimated from the sum of five heating terms (Table 1) in MERRA-2 (black line). (b) The heating variables decomposed into five contributions as indicated (see Table 1). Results shown are for year 2010.

(a)

Year: 2011

$\theta_e$  surface: 300 (K)

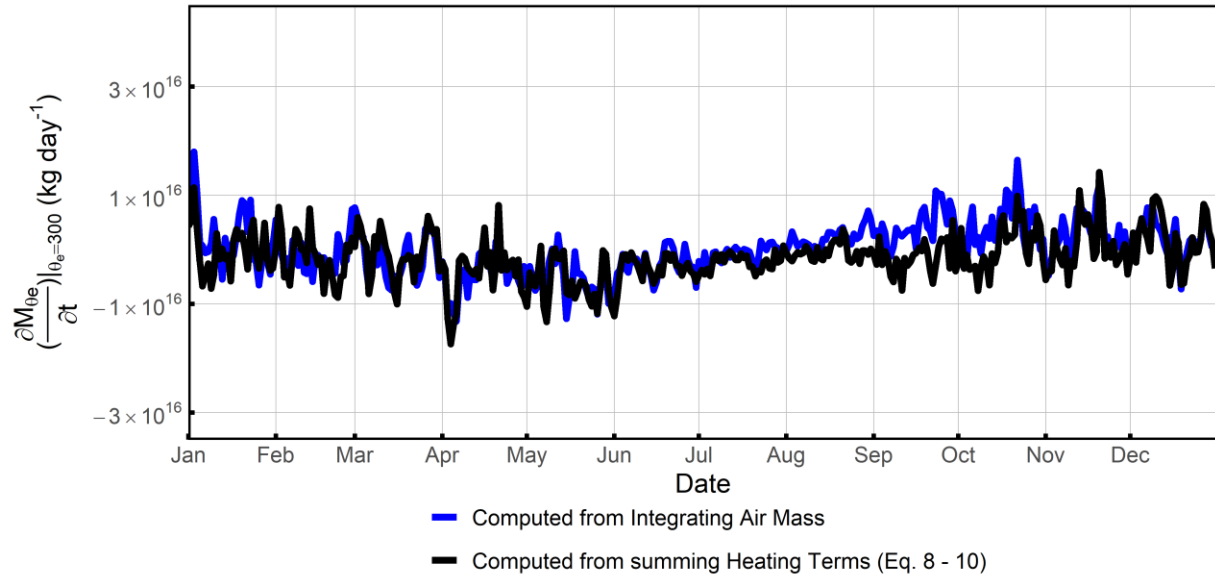

(b)

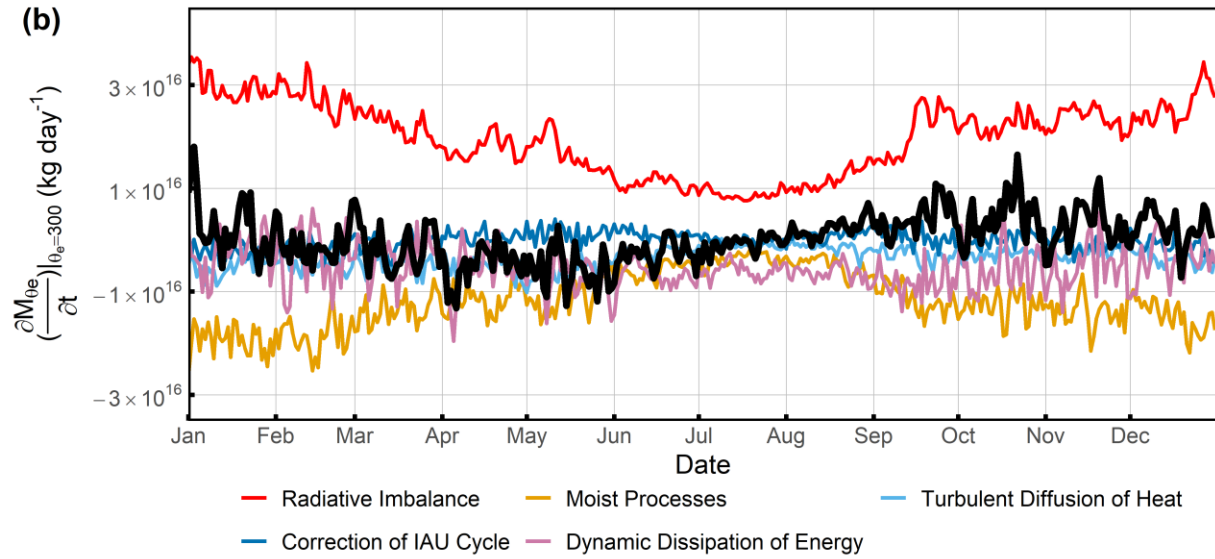

Figure S2: Similar to Figure S1, but for the year of 2011.

(a)

Year: 2009

$\theta_e$  surface: 290 (K)

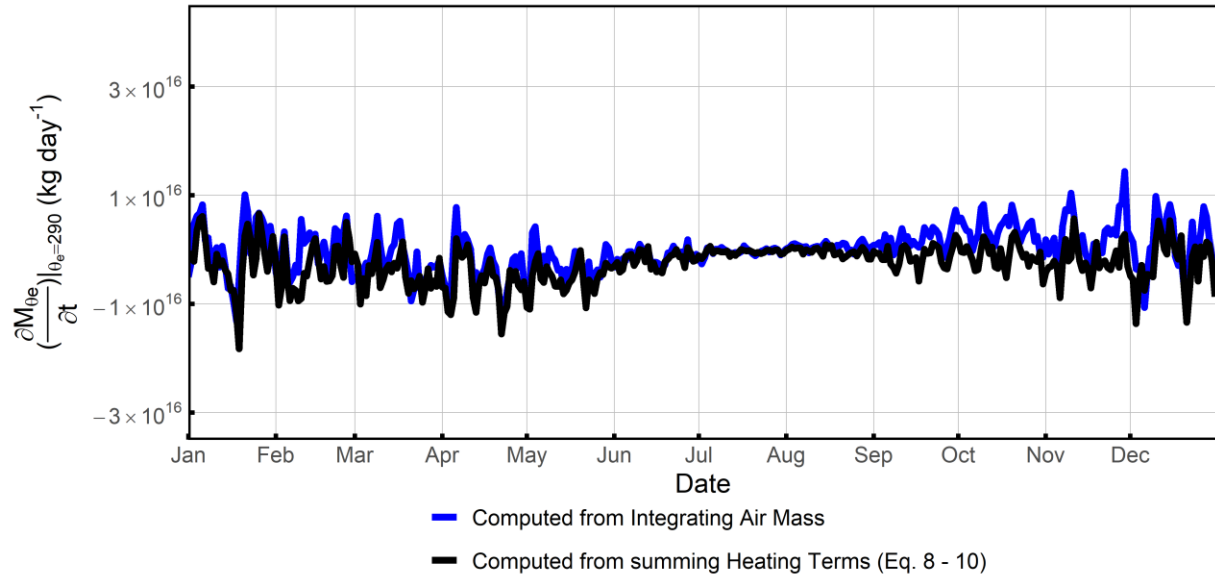

(b)

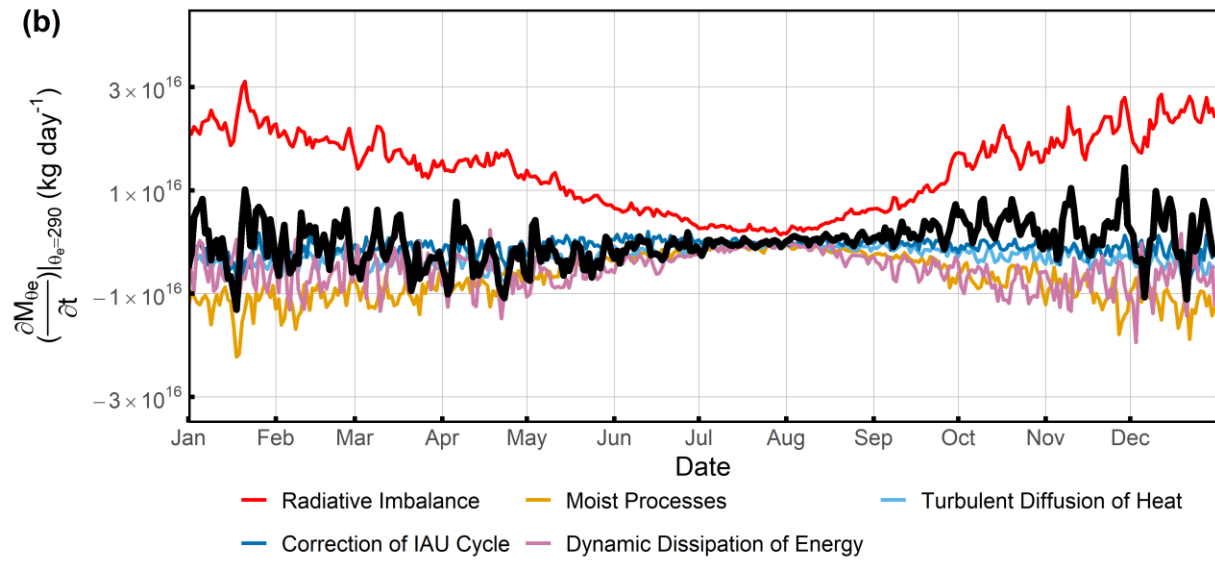

(a)

Year: 2009

$\theta_e$  surface: 310 (K)

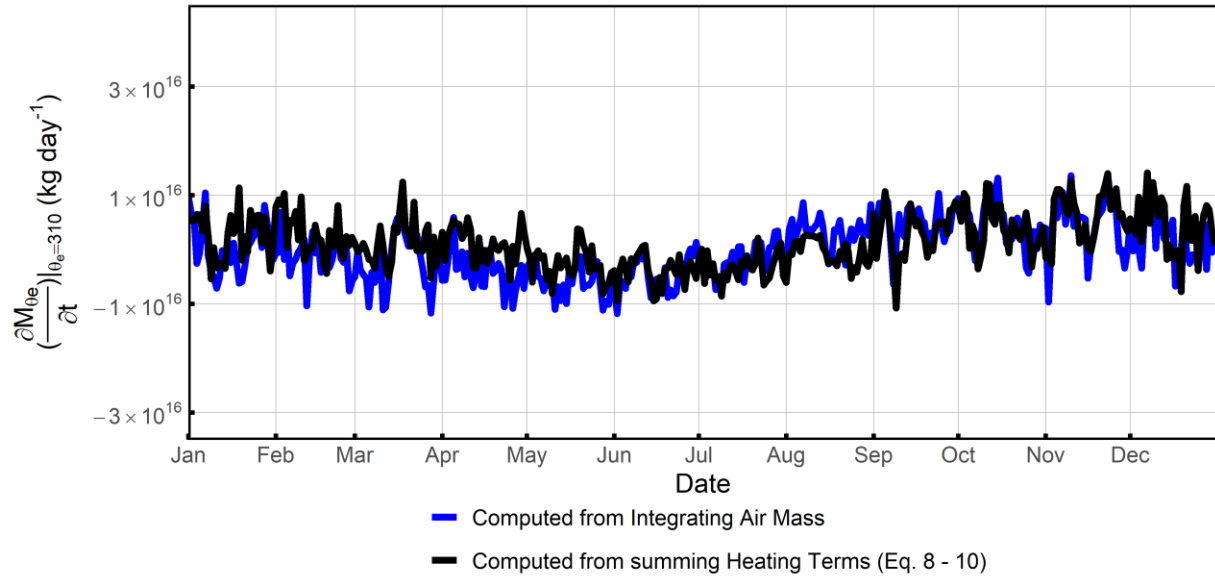

(b)

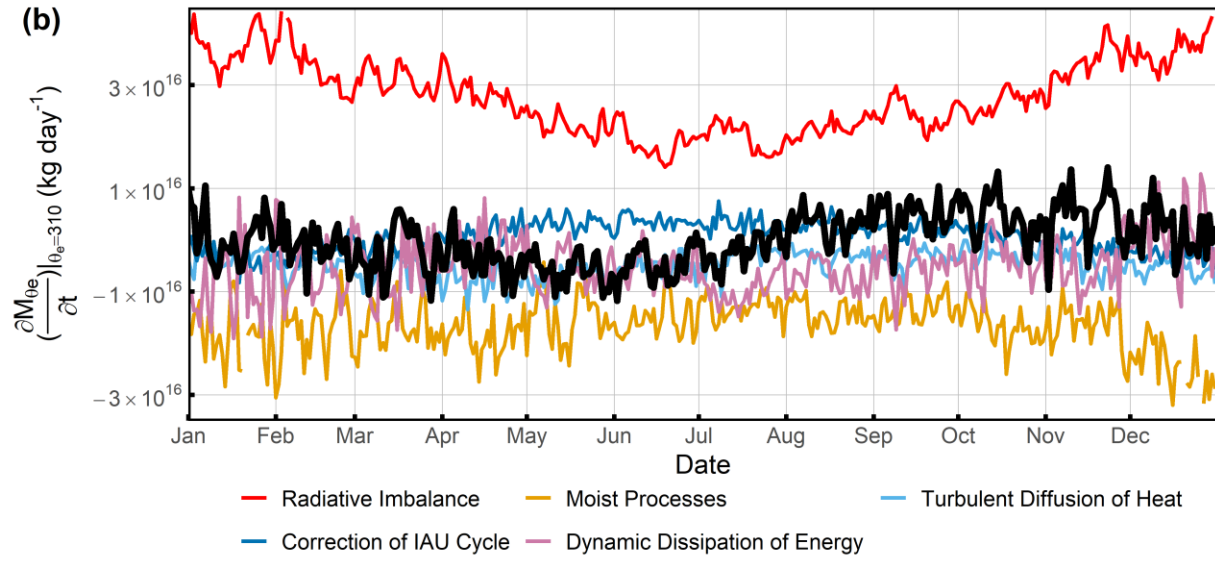

Figure S4: Similar to Figure S3, but on the 310 K  $\theta_e$  surface.

**Table S1: Number of data points of each airborne campaign transect for each simulation**

| Airborne<br>Transect | Original | Equator<br>to 30 °N | Poleward<br>of 30 °N | Surface –<br>600 mbar | 600 mbar<br>– Trop. | Pacific<br>Only | Medusa<br>Coverage | Random<br>10 % | Random<br>5 % | Random<br>1 % |
|----------------------|----------|---------------------|----------------------|-----------------------|---------------------|-----------------|--------------------|----------------|---------------|---------------|
| HIPPO1 SB            | 4837     | 1454                | 3383                 | 1794                  | 3043                | 4837            | 76                 | 484            | 242           | 48            |
| HIPPO2 SB            | 4665     | 1510                | 3155                 | 1945                  | 2720                | 4665            | 82                 | 451            | 233           | 45            |
| HIPPO2 NB            | 5508     | 2428                | 3080                 | 2159                  | 3349                | 5508            | 93                 | 543            | 275           | 54            |
| HIPPO3 SB            | 4439     | 1371                | 3068                 | 2038                  | 2401                | 4439            | 88                 | 427            | 222           | 43            |
| HIPPO3 NB            | 4086     | 1135                | 2951                 | 1790                  | 2296                | 4086            | 84                 | 399            | 204           | 40            |
| HIPPO4 SB            | 5491     | 1602                | 3889                 | 2340                  | 3151                | 5491            | 81                 | 534            | 275           | 53            |
| HIPPO4 NB            | 6411     | 3134                | 3277                 | 3142                  | 3269                | 6411            | 124                | 626            | 321           | 63            |
| HIPPO5 SB            | 5538     | 1678                | 3860                 | 2569                  | 2969                | 5538            | 78                 | 548            | 277           | 55            |
| HIPPO5 NB            | 4715     | 1705                | 3010                 | 2066                  | 2649                | 4715            | 86                 | 392            | 236           | 39            |
| ATom1 SB             | 9832     | 2333                | 7499                 | 3186                  | 6646                | 9832            | 83                 | 455            | 492           | 46            |
| ATom1 NB             | 10685    | 3186                | 7499                 | 3665                  | 7020                | 0               | 59                 | 893            | 534           | 89            |
| ATom2 SB             | 11372    | 3909                | 7463                 | 4057                  | 7315                | 11372           | 84                 | 1109           | 569           | 111           |
| ATom2 NB             | 10741    | 3284                | 7457                 | 3792                  | 6949                | 0               | 91                 | 1042           | 537           | 104           |
| ATom3 SB             | 15143    | 3751                | 11392                | 4817                  | 10326               | 15143           | 87                 | 1460           | 757           | 146           |
| ATom3 NB             | 14039    | 4173                | 9866                 | 4764                  | 9275                | 0               | 92                 | 1362           | 702           | 136           |
| ATom4 SB             | 13554    | 3683                | 9871                 | 5249                  | 8305                | 13554           | 84                 | 1327           | 678           | 132           |
| ATom4 NB             | 11995    | 3626                | 8369                 | 4130                  | 7865                | 0               | 89                 | 1187           | 600           | 119           |

## References

- 40 Graven, H. D., Keeling, R. F., Piper, S. C., Patra, P. K., Stephens, B. B., Wofsy, S. C., Welp, L. R., Sweeney, C., Tans, P. P., Kelley, J. J., Daube, B. C., Kort, E. A., Santoni, G. W. and Bent, J. D.: Enhanced seasonal exchange of CO<sub>2</sub> by Northern ecosystems since 1960, *Science*, 341(6150), 1085–1089, doi:10.1126/science.1239207, 2013.
